# Supplementary material for: Scientometrics Approach to Research in Ovine Mastitis from 1970 to 2019 (with a Complete List of Relevant Literature References)
Source: MDPI journal article supplement (doi:10.3390/pathogens9070585), 2020-07-17
Supplement: s1 [file s1]

*Communication*

**Scientometrics Approach to Research in Ovine Mastitis from 1970 to 2019 (with a Complete List of Relevant Literature References)**

Daphne T. Lianou and George C. Fthenakis

Table S1. Details of 580 papers published from 1970 until 2019 on ovine mastitis and listed in the Web of Science platform

| No. | Title of article                                                                                                                                             | Year of publication | Journal in which published | First author     | No. of authors | Last author   | Country(ies) of origin | Establishment(s) of origin                      | Article type                          | Study type   | Mastitis aspect covered | Production type referred to |           |       |
|-----|--------------------------------------------------------------------------------------------------------------------------------------------------------------|---------------------|----------------------------|------------------|----------------|---------------|------------------------|-------------------------------------------------|---------------------------------------|--------------|-------------------------|-----------------------------|-----------|-------|
| 1   | Experimental ovine mastitis - A pathologic study                                                                                                             | 1970                | Vet Pathol                 | E-Etelsby        | 2              | Abdel-Hamid   | EGY                    | U Assiut                                        | Original                              | Experimental | Pathogenesis            | Dairy                       |           |       |
| 2   | Experimental production of mastitis in sheep by <i>Mycobacterium smegmatis</i> and <i>Mycobacterium fortuitum</i>                                            | 1971                | Cornell Vet                | Richardson       | 1              |               | USA                    | U Cornell                                       | Original                              | Experimental | Pathogenesis            | Meat                        |           |       |
| 3   | Mastitis produced experimentally in sheep with ovine abortion <i>Chlamydia</i>                                                                               | 1972                | Zblatt Vetmed B            | Papadopoulos     | 2              | Leontides     | GRE                    | Aristotle U Thessaloniki                        | Original                              | Experimental | Pathogenesis            | Dairy                       |           |       |
| 4   | <i>Bacillus cereus</i> as a cause of bovine mastitis 1. Occurrence of a case of mastitis and studies on its infectivity for sheep and cow                    | 1973                | Zblatt Vetmed B            | Merk             | 2              | Burrow        | FRG                    | U Berlin                                        | Original                              | Experimental | Pathogenesis            | Meat                        |           |       |
| 5   | Observation of a spontaneous case of fatal ovine mastitis due to <i>Klebsiella pneumoniae</i>                                                                | 1977                | Zblatt Vetmed B            | Mandal           | 3              | Ahuja         | IND                    | U Punjab                                        | Original                              | Field        | Aetiology               | Dairy                       |           |       |
| 6   | Mastitis in cows, goats and sheep                                                                                                                            | 1978                | Norsk Vetmed               | Mosdal           | 1              |               | NOR                    | U Oslo                                          | Original                              | Field        | Aetiology               | Meat                        |           |       |
| 7   | Incidence and importance of subclinical mastitis in sheep                                                                                                    | 1978                | J Anim Sci                 | Gross            | 4              | Torell        | USA                    | U California Davis                              | Original                              | Field        | Aetiology               | Meat                        |           |       |
| 8   | Genetic and environmental effects on milk production, milk composition and mastitis incidence in crossbred ewes                                              | 1979                | J Anim Sci                 | Torres-Hernandez | 2              | Hohenboken    | USA                    | U Oregon                                        | Original                              | Field        | Risk factors            | Dairy                       |           |       |
| 9   | Mastitis and other abnormalities as related to neonatal lamb mortality in shed-lambled range ewes                                                            | 1980                | J Anim Sci                 | Kirk             | 3              | Anderson      | USA                    | U Idaho                                         | Original                              | Field        | Effects                 | Meat                        |           |       |
| 10  | Prevention of post weaning mastitis in ewes                                                                                                                  | 1981                | Vet Rec                    | Hendy            | 4              | Davies        | GBR                    | Glaxo                                           | Original                              | Field        | Control                 | Meat                        |           |       |
| 11  | Immunization against experimental staph. Mastitis - Effect of challenge with a heterologous strain of <i>Staphylococcus aureus</i>                           | 1981                | Aus Vet J                  | Watson           | 2              | Kennedy       | AUS                    | U James Cook                                    | CSIRO                                 | Original     | Experimental            | Control                     | Meat      |       |
| 12  | Effect of immunization of early influx of neutrophils during staphylococcal mastitis in sheep                                                                | 1982                | Res Vet Sci                | Colditz          | 2              | Watson        | AUS                    | U Queensland                                    | CSIRO                                 | Original     | Experimental            | Control                     | Meat      |       |
| 13  | The role of humoral and cellular mediators in enhanced mammary inflammatory reactions to staphylococcal infection in systemically immunised ewes             | 1982                | Microbiol Immunol          | Colditz          | 2              | Watson        | AUS                    | U Queensland                                    | CSIRO                                 | Original     | Experimental            | Control                     | Meat      |       |
| 14  | Mastitis in sheep in the Netherlands                                                                                                                         | 1983                | Tijd Diergk                | Koing            | 3              | Gelling       | NED                    | Vakgroep Bedrijfsdiergeneeskunde & Buitensprak  | Original                              | Field        | Aetiology               | Meat                        |           |       |
| 15  | Ovine mastitis due to <i>Histophilus ovis</i>                                                                                                                | 1983                | Can Vet J                  | Beaugrand        | 2              | Higgins       | CDN                    | U Montreal                                      | Original                              | Field        | Aetiology               | Meat                        |           |       |
| 16  | Modern aspects of sheep mastitis                                                                                                                             | 1984                | Br Vet J                   | Watson           | 2              | Buswell       | GBR                    | Beecham Animal Health                           | Review                                |              |                         |                             |           |       |
| 17  | Mastitis in sheep in Iraq                                                                                                                                    | 1985                | Vet Rec                    | Al-Samarrae      | 3              | Yousif        | IRQ                    | IND                                             | U Baghdad                             | U Haryana    | Original                | Field                       | Aetiology | Dairy |
| 18  | Immunophysiological activity of supra-mammary lymph nodes of the ewe                                                                                         | 1985                | Res Vet Sci                | Watson           | 2              | Davies        | AUS                    | U New England                                   | CSIRO                                 | Original     | Experimental            | Pathogenesis                | Meat      |       |
| 19  | Pathology of acute experimental of <i>Actinobacillus seminis</i> mastitis                                                                                    | 1985                | Aus Vet J                  | Ahnesoy          | 2              | Dennis        | USA                    | U Kansas                                        | Original                              | Experimental | Pathogenesis            | Meat                        |           |       |
| 20  | Mastitis and cell content milk in milk from Scottish blackface ewes                                                                                          | 1986                | Vet Rec                    | Mackie           | 2              | Rodgers       | GBR                    | Veterinary Research Laboratory Northern Ireland | Original                              | Field        | Diagnosis               | Meat                        |           |       |
| 21  | Patterns of non-clinical intramammary infection in a ewe flock                                                                                               | 1986                | J Am Vet Med Assoc         | Hausdon          | 3              | Judy          | USA                    | U Ohio State                                    | Original                              | Field        | Aetiology               | Meat                        |           |       |
| 22  | Detection of ovine intramammary infection                                                                                                                    | 1986                | J Am Vet Med Assoc         | Hausdon          | 3              | Judy          | USA                    | U Ohio State                                    | Original                              | Field        | Diagnosis               | Meat                        |           |       |
| 23  | Diseases of sheep and goats: mastitis                                                                                                                        | 1987                | Wiener Tierarz Monats      | Sascholer        | 3              | Kessler       | AUT                    | U Vienna                                        | Review                                |              |                         |                             |           |       |
| 24  | Iatrogenic mastitis in sheep                                                                                                                                 | 1987                | Tijd Diergk                | Roumen           | 3              | Gruys         | NED                    | Gezondheidsinst Dieren                          | Original                              | Field        | Pathogenesis            | Meat                        |           |       |
| 25  | Detection of subclinical mastitis in ewes                                                                                                                    | 1987                | Br Vet J                   | Maisi            | 3              | Seppanen      | FIN                    | U Helsinki                                      | Original                              | Field        | Diagnosis               | Meat                        |           |       |
| 26  | Protective effect of glucan against experimentally induced staphylococcal mastitis in ewes                                                                   | 1988                | Vet Microbiol              | Buddle           | 3              | Raldson       | NZL                    | Ministry of Agriculture New Zealand             | Original                              | Experimental | Control                 | Meat                        |           |       |
| 27  | Vaccination against experimental mastitis                                                                                                                    | 1988                | Res Vet Sci                | Watson           | 1              |               | AUS                    | CSIRO                                           | Original                              | Experimental | Control                 | Meat                        |           |       |
| 28  | Incidence and control of subclinical mastitis in intensively managed ewes                                                                                    | 1988                | J Anim Sci                 | McCarthy         | 4              | Notter        | USA                    | U Virginia Polytechnic                          | Original                              | Field        | Epidemiology            | Meat                        |           |       |
| 29  | Non-clinical intramammary infection in lactating ewes and its association with clinical mastitis                                                             | 1989                | Br Vet J                   | Bor              | 3              | Goetwine      | ISR                    | Agri Research Organisation Israel               | Original                              | Field        | Epidemiology            | Dairy                       |           |       |
| 30  | Intramammary antibiotic treatment at the end of lactation for prophylaxis and treatment of intramammary infections in ewes                                   | 1989                | J Am Vet Med Assoc         | Hausdon          | 3              | Baertsche     | USA                    | U Ohio State                                    | Original                              | Field        | Control                 | Meat                        |           |       |
| 31  | Investigations on cell counts of milk and distribution of bacterial mastitis in lower Austrian sheep and goat flocks                                         | 1990                | Wiener Tierarz Monats      | Deutz            | 4              | Baumgartner   | AUT                    | U Vienna                                        | Original                              | Field        | Epidemiology            | Dairy                       |           |       |
| 32  | Incidence of staphylococci in ovine mastitic milk and antibiotic susceptibility of the strains                                                               | 1990                | MilchWissenschaft          | Gutierrez        | 5              | Moveno        | FRA                    | U Leon                                          | Original                              | Field        | Epidemiology            | Treatment                   | Dairy     |       |
| 33  | The effect of experimentally induced subclinical mastitis on milk yield of ewes and on the growth of lambs                                                   | 1990                | Br Vet J                   | Fthenakis        | 2              | Jones         | GBR                    | U London                                        | Original                              | Experimental | Effects                 | Meat                        |           |       |
| 34  | Survey of intramammary infections in ewes on the New England Tableland of New South Wales                                                                    | 1990                | Aus Vet J                  | Watson           | 5              | Frost         | AUS                    | U Queensland                                    | CSIRO                                 | Original     | Field                   | Epidemiology                | Meat      |       |
| 35  | Acute mastitis in sheep                                                                                                                                      | 1990                | Prakt Tierarz              | Boisclit         | 1              |               | FRG                    | U Gießen                                        | Original                              | Field        | Epidemiology            | Meat                        |           |       |
| 36  | Milk whey induction of agglutination in ovine and bovine mastitis <i>Staphylococcus aureus</i>                                                               | 1990                | Zblatt Vetmed B            | Baselga          | 2              | Amoena        | ESP                    | U Zaragoza                                      | Original                              | Laboratory   | Aetiology               | Dairy                       |           |       |
| 37  | The influence of different factors on milk composition and production of the ewes of the Tsigai breed within the milking period                              | 1991                | Zvejskica Vyroba           | Margetin         | 4              | Capistak      | CZE                    | Research Institute Sheep Breeding Coochla       | Original                              | Field        | Effects                 | Dairy                       |           |       |
| 38  | Somatic cell counts and CMT results in milk sheep with normal udder health during a complete lactation period                                                | 1991                | Schweizer Arch Tierarz     | Regli            | 5              | Rusch         | SWI                    | U Zurich                                        | Swiss Federal Institute of Technology | Original     | Field                   | Diagnosis                   | Dairy     |       |
| 39  | Suitability of lactate dehydrogenase activity and somatic cell counts of milk for detection of subclinical mastitis in Morino ewes                           | 1991                | Acta Vet Hung              | Nizamioglu       | 2              | Erganis       | TUR                    | U Selduk                                        | Original                              | Laboratory   | Diagnosis               | Dairy                       |           |       |
| 40  | Infection of rabbit mammary glands with ovine mastitis bacterial strains                                                                                     | 1991                | J Comp Pathol              | Amoena           | 10             | Faris         | ESP                    | SIA DGA-Zaragoza                                | U Uppsala                             | Original     | Laboratory              | Pathogenesis                | Dairy     |       |
| 41  | Variation in somatic cell counts, California Mastitis Test and electrical conductivity among various fractions of ewes milk                                  | 1991                | J Dairy Sci                | Peris            | 5              | Torres        | ESP                    | U Valencia                                      | Original                              | Laboratory   | Diagnosis               | Dairy                       |           |       |
| 42  | A field investigation of subclinical mastitis in sheep                                                                                                       | 1991                | Br Vet J                   | Waikins          | 3              | Jones         | GBR                    | U London                                        | Original                              | Field        | Epidemiology            | Meat                        |           |       |
| 43  | The experimental production of mastitis in sheep by intramammary inoculation of <i>Pasteurella haemolytica</i>                                               | 1991                | J Comp Pathol              | El-Masarnat      | 3              | Scott         | GBR                    | U London                                        | Original                              | Experimental | Pathogenesis            | Meat                        |           |       |
| 44  | Somatic cell counts of ewes milk                                                                                                                             | 1991                | Br Vet J                   | Fthenakis        | 4              | Jones         | GBR                    | U London                                        | Original                              | Laboratory   | Diagnosis               | Meat                        |           |       |
| 45  | An efficient microtest to study adherence of bacteria to mammalian cells                                                                                     | 1992                | FEMS Microbiol Lett        | Aguilar          | 4              | Amoena        | ESP                    | SIA DGA-Zaragoza                                | Original                              | Laboratory   | Pathogenesis            | Dairy                       |           |       |
| 46  | Enterotoxin and toxic shock syndrome toxin-one production by staphylococci isolated from mastitis in sheep                                                   | 1992                | AFMS                       | Oxden            | 6              | Delafoente    | ESP                    | U Madrid                                        | Original                              | Laboratory   | Aetiology               | Dairy                       |           |       |
| 47  | Production of staphylococcal enterotoxin and TSST-1 by coagulase-negative staphylococci isolated from ruminant mastitis                                      | 1992                | Zblatt Vetmed B            | Oxden            | 6              | Gomez-Lucia   | ESP                    | U Madrid                                        | Original                              | Laboratory   | Aetiology               | Dairy                       |           |       |
| 48  | Influence of the lactation period on the cell count of milk samples of ewes                                                                                  | 1992                | Deut Tierarz Wochen        | Baumgartner      | 3              | Eibl          | AUS                    | U Vienna                                        | Original                              | Field        | Diagnosis               | Dairy                       |           |       |
| 49  | Nucleotide sequences and biologic properties of toxic shock syndrome from ovine-associated and bovine-associated <i>Staphylococcus aureus</i>                | 1992                | J Infect Dis               | Lee              | 9              | Schlervet     | USA                    | U Minnesota                                     | Original                              | Laboratory   | Aetiology               | Meat                        |           |       |
| 50  | Detection of enterotoxin and TSST-1 secreted by <i>Staphylococcus aureus</i> isolated from ruminant mastitis - Comparison of ELISA and immunoblot            | 1992                | J Appl Bacteriol           | Oxden            | 6              | Gomez-Lucia   | ESP                    | U Madrid                                        | Original                              | Laboratory   | Aetiology               | Dairy                       |           |       |
| 51  | Subclinical mastitis in ewes and its effect on lamb performance                                                                                              | 1992                | J Anim Sci                 | Keisler          | 3              | Moffatt       | USA                    | U Missouri                                      | Original                              | Field        | Effects                 | Meat                        |           |       |
| 52  | Number and evaluation of somatic cells in the milk of goats and sheep                                                                                        | 1992                | Archiv Lebensmittelhygiene | Hahn             | 6              | Hooschen      | GER                    | Institute of Hygiene Germany                    | Original                              | Field        | Diagnosis               | Dairy                       |           |       |
| 53  | The descriptive epidemiology of udder lesions in Northern Iraqi ewes                                                                                         | 1992                | Prev Vet Med               | Sulaiman         | 2              | Alsaadi       | IRQ                    | U Mosul                                         | Original                              | Field        | Epidemiology            | Dairy                       |           |       |
| 54  | Hydrophobicity of ruminant mastitis <i>Staphylococcus aureus</i>                                                                                             | 1992                | Curr Microbiol             | Baselga          | 6              | Amoena        | ESP                    | SIA DGA-Zaragoza                                | Original                              | Laboratory   | Aetiology               | Dairy                       |           |       |
| 55  | Use of the Fosomatic method to determine somatic cell counts                                                                                                 | 1993                | J Dairy Sci                | Gonzalo          | 4              | San Primitivo | ESP                    | U Leon                                          | Original                              | Field        | Diagnosis               | Dairy                       |           |       |
| 56  | Experimental intramammary infection of ewes with <i>Staphylococcus aureus</i> subsp. <i>anaerobius</i>                                                       | 1993                | Res Vet Sci                | Delafoente       | 5              | Suaez         | ESP                    | U Madrid                                        | Original                              | Experimental | Pathogenesis            | Dairy                       |           |       |
| 57  | Role of an intramammary device protection against experimentally induced staphylococcal mastitis in ewes                                                     | 1993                | Am J Vet Res               | Petados          | 6              | Amoena        | ESP                    | SIA DGA-Zaragoza                                | Original                              | Experimental | Control                 | Dairy                       |           |       |
| 58  | Differentiation of staphylococci from ewe and goat milk samples                                                                                              | 1993                | Deut Tierarz Wochen        | Deitshofer       | 2              | Pernhaner     | AUT                    | U Vienna                                        | Original                              | Field        | Aetiology               | Dairy                       |           |       |
| 59  | Phase variation of slime production in <i>Staphylococcus aureus</i> - implications in colonisation and virulence                                             | 1993                | Infect Immun               | Baselga          | 6              | Amoena        | ESP                    | SIA DGA-Zaragoza                                | Original                              | Experimental | Aetiology               | Pathogenesis                | Dairy     |       |
| 60  | Adherence of ruminant mastitis <i>Staph aureus</i> strains to epithelial cells from ovine mammary gland primary cultures and from a rat intestinal cell line | 1993                | Vet Microbiol              | Hurtado          | 4              | Amoena        | ESP                    | U Zaragoza                                      | SIA DGA Zaragoza                      | Original     | Laboratory              | Pathogenesis                | Dairy     |       |
| 61  | Genetic and environmental causes of variation in mastitis in sheep                                                                                           | 1993                | Small Rumin Res            | Laragud          | 2              | Vabnace       | NOR                    | Agricultural U Norway                           | Original                              | Field        | Risk factors            | Meat                        |           |       |
| 62  | Immunobiological and biochemical properties of mutants                                                                                                       | 1994                | J Immunol                  | Murray           | 9              | Schlervet     | USA                    | U Minnesota                                     | Original                              | Laboratory   | Aetiology               | Dairy                       |           |       |
| 63  | Some properties of coagulase negative staphylococci isolated from cases of ovine mastitis                                                                    | 1994                | Epidemiol Infect           | Fthenakis        | 4              | Jones         | GBR                    | U London                                        | Original                              | Laboratory   | Aetiology               | Meat                        |           |       |
| 64  | Use of liposome immunopotentialized exopolysaccharide as a component of an ovine mastitis staphylococcal vaccine                                             | 1994                | Vaccine                    | Amoena           | 3              | Albizu        | ESP                    | SIA DGA-Zaragoza                                | Original                              | Experimental | Control                 | Dairy                       |           |       |

|     |                                                                                                                                                              |      |                          |                      |   |                      |     |                                                         |                                  |          |              |              |              |       |
|-----|--------------------------------------------------------------------------------------------------------------------------------------------------------------|------|--------------------------|----------------------|---|----------------------|-----|---------------------------------------------------------|----------------------------------|----------|--------------|--------------|--------------|-------|
| 65  | Prevalence and aetiology of subclinical mastitis in ewes of Southern Greece                                                                                  | 1994 | Small Rumin Res          | Fthenakis            | 1 |                      | GRE | Lapapharm                                               |                                  | Original | Field        | Epidemiology |              | Dairy |
| 66  | Factors influencing variation of test day milk yield, somatic cell count, fat and protein in dairy sheep                                                     | 1994 | J Dairy Sci              | Gonzalo              | 4 | Primitivo            | ESP | U Leon                                                  |                                  | Original | Field        | Diagnosis    | Effects      | Dairy |
| 67  | Etiology and prevalence of subclinical mastitis in the Manchuga sheep at mid-late lactation                                                                  | 1994 | Small Rumin Res          | Delacruz             | 8 |                      | ESP | SIA DGA-Zaragoza                                        |                                  | Original | Field        | Aetiology    | Epidemiology | Dairy |
| 68  | Genetic parameters of test day measures for somatic cell counts, milk yield and protein percentage of milking ewes                                           | 1994 | J Dairy Sci              | Bano                 | 3 | Sarapinitivo         | ESP | U Leon                                                  | U Edinburgh                      | Original | Field        | Effects      | Diagnosis    | Dairy |
| 69  | Milk losses caused by chronic mastitis                                                                                                                       | 1995 | Wiener Tierarzts Monat   | Dautz                | 4 | Fuchs                | AUT | U Vienna                                                |                                  | Original | Field        | Effects      |              | Dairy |
| 70  | Effect of variable traction on the teatcup during machine milking of ewes with or without hand stripping                                                     | 1995 | Animal Zoot              | Paris                | 5 | Rodriguez            | ESP | U Valencia                                              |                                  | Original | Field        | Pathogenesis | Effects      | Dairy |
| 71  | Examination of systems that exert traction on the teatcup and reduce teat bending in machine-milking of ewes                                                 | 1995 | Animal Zoot              | Paris                | 5 | Torres               | ESP | U Valencia                                              |                                  | Original | Field        | Pathogenesis | Effects      | Dairy |
| 72  | California mastitis test and Whitehead test in diagnosis of subclinical mastitis of dairy ewes                                                               | 1995 | Small Rumin Res          | Fthenakis            | 1 |                      | GRE | Greek Army Centre Biological Research Greece            |                                  | Original | Field        | Diagnosis    |              | Dairy |
| 73  | Variation in somatic cell counts in ewes milk during lactation                                                                                               | 1995 | Zivociena Vyroba         | Marjetin             | 5 | Folys                | SLK | Research Institute in Animal Production Slovakia        |                                  | Original | Field        | Diagnosis    |              | Dairy |
| 74  | Use of somatic cell counts for the detection of subclinical mastitis in sheep                                                                                | 1995 | Small Rumin Res          | Mavroginis           | 4 | Taliois              | CYP | Agricultural Research Institute Cyprus                  | Ministry of Agriculture Cyprus   | Original | Field        | Diagnosis    |              | Dairy |
| 75  | Frequency of subclinical mastitis and observations on somatic cell counts in ewes milk in Northern Greece                                                    | 1995 | Anim Sci                 | Stefanakis           | 4 | Samariz              | GRE | Aristotle U Thessaloniki                                |                                  | Original | Field        | Epidemiology | Diagnosis    | Dairy |
| 76  | The distribution of <i>Pasteurella haemolytica</i> serotypes among cattle, sheep, and goats in South Africa and their association with disease               | 1995 | Onderstepoort Vet Res    | Ondandaal            | 2 | Henton               | ZAR | Onderstepoort Veterinary Institute South Africa         |                                  | Original | Laboratory   | Aetiology    |              | Meat  |
| 77  | Relationship between somatic cell count and intramammary infection of the half udder in dairy ewes                                                           | 1995 | J Dairy Sci              | Gonzalez-Rodriguez   | 4 | Carmenes             | ESP | U Leon                                                  |                                  | Original | Field        | Diagnosis    |              | Dairy |
| 78  | Coagulase negative staphylococci as a pathogen of subclinical and clinical mastitis in three flocks of milk sheep                                            | 1996 | Tierarzt Umsich          | Winter               | 2 | Holer                | AUT | U Vienna                                                | Disease Institute Austria        | Original | Field        | Aetiology    |              | Meat  |
| 79  | Somatic cell counts in milk of Welsh Mountain, Dorset-Horn and Chios ewes throughout lactation                                                               | 1996 | Small Rumin Res          | Fthenakis            | 1 |                      | GRE | Lapapharm                                               |                                  | Original | Field        | Diagnosis    |              | Dairy |
| 80  | Mastitis in ewes                                                                                                                                             | 1996 | Comp Cont Edu Pract Vet  | Kirk                 | 1 |                      | USA | U California Davis                                      | U Auburn                         | Review   |              |              |              |       |
| 81  | Total and differential cell count in milk of primiparous Comisana ewes without clinical signs of mastitis                                                    | 1996 | Small Rumin Res          | Morgante             | 5 | Duranti              | ITA | Inst Semiotica Medica e Metodologia Clinica Veterinaria | Istituto di Zootecnica Generale  | Original | Field        | Diagnosis    |              | Dairy |
| 82  | Evaluation of the California mastitis test as a discriminant method to detect subclinical mastitis in ewes                                                   | 1996 | Small Rumin Res          | Gonzalez-Rodriguez   | 2 | Carmenes             | ESP | U Leon                                                  |                                  | Original | Field        | Diagnosis    |              | Dairy |
| 83  | Resistance to antibiotics in <i>Staphylococcus aureus</i> at ewe mastitis, in sheep milk and its products                                                    | 1996 | Veterinarni Medicina     | Simko                | 2 | Bartko               | CZE | U Kosice                                                | Ministry of Agriculture Slovakia | Original | Laboratory   | Treatment    |              | Dairy |
| 84  | Cytokine induced inflammation in the ovine teat and udder                                                                                                    | 1996 | Vet Immunol Immunopathol | Pensson              | 5 | Scow                 | SWE | U Uppsala                                               | CSIRO                            | Original | Experimental | Pathogenesis |              | Meat  |
| 85  | Mastitis in a flock of milking sheep                                                                                                                         | 1996 | Small Rumin Res          | Kirk                 | 3 | Maas                 | USA | U Auburn                                                | U California Davis               | Original | Field        | Aetiology    | Epidemiology | Dairy |
| 86  | Total and differential cell count by direct microscopic method on ewe milk                                                                                   | 1996 | J Vet Med A              | Morgante             | 4 | Bighelli             | ITA | U Perugia                                               |                                  | Original | Laboratory   | Diagnosis    |              | Dairy |
| 87  | Subclinical mastitis in sheep                                                                                                                                | 1996 | Ind Vet J                | Rao                  | 3 | Sreenamaryana        | IND | Veterinary Polytechnic                                  |                                  | Original | Field        | Aetiology    | Epidemiology | Dairy |
| 88  | Somatic cells in sheep milk in relation to milk production and composition during suckling and milking                                                       | 1996 | Zivociena Vyroba         | Marjetin             | 4 | Folys                | SLK | Vyskumny Ustav Zivocinnej Vyroby                        |                                  | Original | Field        | Effects      |              | Dairy |
| 89  | Accumulation of leucocytes and cytokines in the lactating ovine udder during mastitis due to <i>Staphylococcus aureus</i> and <i>Escherichia coli</i>        | 1997 | Res Vet Sci              | Pearson-Walker       | 3 | Scow                 | SWE | U Uppsala                                               | CSIRO                            | Original | Experimental | Pathogenesis |              | Meat  |
| 90  | Experimental studies on <i>Pasteurella</i> mastitis in ewes                                                                                                  | 1997 | Largo Anim Pract         | Al-Ani               | 3 | Karim                | JOD | Jordan U Science Technology                             | U Baghdad                        | Original | Experimental | Pathogenesis |              | Dairy |
| 91  | Evaluation of the Staph-Zym system in the identification of <i>Staphylococci</i>                                                                             | 1997 | J Basic Microbiol        | Burriel              | 2 | Scott                | GBR | U London                                                |                                  | Original | Laboratory   | Aetiology    |              | Meat  |
| 92  | Leukocyte and cytokine accumulation in the ovine teat and udder during endotoxin-induced inflammation                                                        | 1997 | Vet Res Comm             | Walker               | 4 | Scow                 | SWE | U Uppsala                                               | CSIRO                            | Original | Experimental | Pathogenesis |              | Meat  |
| 93  | Udder ort infection and its role in ovine clinical mastitis caused by <i>Pasteurella haemolytica</i>                                                         | 1997 | J Trace Elem Med Biol    | Burriel              | 1 |                      | GBR | U London                                                |                                  | Original | Field        | Risk factors |              | Meat  |
| 94  | Dynamics of intramammary infection in the sheep caused by coagulase-negative staphylococci and its influence on udder tissue and milk composition            | 1997 | Vet Rec                  | Burriel              | 1 |                      | GBR | U London                                                |                                  | Original | Field        | Pathogenesis |              | Meat  |
| 95  | Milk differential cell counts in relation to total counts in Sardinian ewes                                                                                  | 1997 | Small Rumin Res          | Cuccuru              | 6 | Coentis              | ITA | U Sassari                                               |                                  | Original | Field        | Diagnosis    |              | Dairy |
| 96  | Serological diagnosis of bovine, caprine and ovine mastitis caused by <i>Listeria monocytogenes</i> by using an enzyme-linked immunosorbent assay            | 1997 | J Clin Microbiol         | Bourry               | 3 | Pourel               | FRA | INRA                                                    |                                  | Original | Laboratory   | Diagnosis    |              | Dairy |
| 97  | Comparison of different machine milking clusters on dairy ewes with large size teats                                                                         | 1997 | Animal Zoot              | Fernandez            | 7 | Torres               | ESP | U Valencia                                              |                                  | Original | Experimental | Risk factors |              | Dairy |
| 98  | Resistance of coagulase negative staphylococci isolated from sheep to various antimicrobial agents                                                           | 1997 | Res Vet Sci              | Burriel              | 1 |                      | GBR | U London                                                |                                  | Original | Laboratory   | Treatment    |              | Meat  |
| 99  | Leukotoxic factors produced by staphylococci of ovine origin                                                                                                 | 1997 | Microbiol Res            | Burriel              | 2 | Dagnall              | GBR | U London                                                |                                  | Original | Laboratory   | Treatment    |              | Meat  |
| 100 | <i>Corynebacterium mastitidis</i> sp. nov., isolated from milk of sheep with subclinical mastitis                                                            | 1997 | Int J Syst Bacteriol     | Fernandez-Garayzabal | 7 | Dominguez            | ESP | U Madrid                                                |                                  | Original | Field        | Aetiology    |              | Dairy |
| 101 | Pharmacokinetics and penetration of danofloxacin from the blood into the milk of ewes                                                                        | 1997 | Vet Res                  | Shem-Tov             | 4 | Saran                | ISR | Ministry of Agriculture Israel                          |                                  | Original | Laboratory   | Treatment    |              | Dairy |
| 102 | Isolation of <i>Pasteurella haemolytica</i> from grass, drinking water and straw bedding                                                                     | 1997 | Curr Microbiol           | Burriel              | 1 |                      | GBR | U London                                                |                                  | Original | Field        | Aetiology    |              | Meat  |
| 103 | Electron microscopic study of milk sediments - Qualitative and quantitative observations                                                                     | 1997 | AFMS                     | Burriel              | 2 | Brendle              | GBR | U London                                                |                                  | Original | Laboratory   | Pathogenesis |              | Meat  |
| 104 | Pharmacokinetics and penetration of marbofloxacin from blood into the milk of ewes and ewes                                                                  | 1997 | J Vet Med A              | Shem-Tov             | 4 | Saran                | ISR | Ministry of Agriculture Israel                          |                                  | Original | Laboratory   | Treatment    |              | Dairy |
| 105 | Serum and milk iron levels during sheep intramammary infection caused by coagulase-negative staphylococci                                                    | 1997 | Biolog Trace Elem Res    | Burriel              | 2 | Heys                 | GBR | U London                                                |                                  | Original | Field        | Risk factors |              | Meat  |
| 106 | In vitro presence of capsular polysaccharide in coagulase-negative staphylococci of ovine origin                                                             | 1997 | Microbiologica           | Burriel              | 1 |                      | GBR | U London                                                |                                  | Original | Laboratory   | Aetiology    |              | Meat  |
| 107 | Epidemiological studies of clinical and subclinical ovine mastitis in Awassi sheep in northern Jordan                                                        | 1998 | Prev Vet Med             | Lafi                 | 4 | Alawah               | JOD | Jordan U Science Technology                             |                                  | Original | Field        | Epidemiology | Aetiology    | Dairy |
| 108 | The effects of inoculation of <i>Listeria monocytogenes</i> into the ovine mammary gland                                                                     | 1998 | Vet Microbiol            | Tzora                | 3 | Linde                | GRE | TEI Epirus                                              | U Leipzig                        | Original | Experimental | Pathogenesis |              | Dairy |
| 109 | Histopathological and ultrastructural observation of ovine mammary glands experimentally inoculated with coagulase-negative staphylococci                    | 1998 | Zblatt Vetmed B          | Burriel              | 1 |                      | GBR | U London                                                |                                  | Original | Laboratory   | Pathogenesis |              | Meat  |
| 110 | Isolation of coagulase-negative staphylococci from the milk and environment of sheep                                                                         | 1998 | J Dairy Res              | Burriel              | 1 |                      | GBR | U London                                                |                                  | Original | Field        | Aetiology    | Pathogenesis | Meat  |
| 111 | A comparison of methods used in species identification of coagulase negative staphylococci isolated from the milk of sheep                                   | 1998 | Vet J                    | Burriel              | 2 | Scott                | GBR | U London                                                |                                  | Original | Laboratory   | Aetiology    |              | Meat  |
| 112 | Bovine and ovine mastitis in Dhuleil Valley of Jordan                                                                                                        | 1998 | Veterinar Arhiv          | Lafi                 | 2 | Hallat               | JOD | Jordan U Science Technology                             |                                  | Original | Field        | Aetiology    | Epidemiology | Dairy |
| 113 | Susceptibility to antibiotics of staphylococcal isolates from cases of ovine or bovine mastitis                                                              | 1998 | Small Rumin Res          | Fthenakis            | 1 |                      | GRE | Lapapharm                                               |                                  | Original | Laboratory   | Treatment    |              | Dairy |
| 114 | <i>Corynebacterium campanulensis</i> associated with subclinical mastitis in sheep                                                                           | 1998 | Int J Syst Bacteriol     | Fernandez-Garayzabal | 6 | Dominguez            | ESP | U Madrid                                                |                                  | Original | Laboratory   | Aetiology    |              | Dairy |
| 115 | Exposition of surface antigens of blood and mammary leukocytes in lactating and dry ewes                                                                     | 1998 | Vet Immunol Immunopathol | Pearson-Walker       | 2 | Codditz              | SWE | U Uppsala                                               | CSIRO                            | Original | Laboratory   | Pathogenesis |              | Meat  |
| 116 | The carriage of <i>Pasteurella haemolytica</i> in sheep and its transfer between ewes and lambs                                                              | 1998 | J Comp Pathol            | Scott                | 2 | Jones                | GBR | U London                                                |                                  | Original | Field        | Aetiology    | Pathogenesis | Meat  |
| 117 | Mastitis in dairy ewes associated with <i>Serratia marcescens</i>                                                                                            | 1998 | Small Rumin Res          | Tzora                | 2 | Fthenakis            | GRE | TEI Epirus                                              | Lapapharm                        | Original | Field        | Aetiology    |              | Dairy |
| 118 | Effects of long-term recombinant bovine somatotropin (BST) administration on milk yield, milk composition and mammary gland health of dairy ewes             | 1998 | Small Rumin Res          | Brosos               | 5 | Tsakolof             | GRE | Aristotle U Thessaloniki                                |                                  | Original | Field        | Risk factors |              | Dairy |
| 119 | Classification of the clinical types of udder disease affecting nursing ewes                                                                                 | 1998 | Small Rumin Res          | Calavas              | 4 | Sulpicio             | FRA | Centre Ecopathologie Animale                            |                                  | Original | Field        | Epidemiology |              | Dairy |
| 120 | Mammary and systemic aspergillosis in dairy sheep                                                                                                            | 1998 | Vet Pathol               | Perez                | 5 | Jensen               | ESP | U Leon                                                  | U Copenhagen                     | Original | Field        | Aetiology    |              | Dairy |
| 121 | Detection of <i>Staphylococcus aureus</i> in milk by use of polymerase chain reaction analysis                                                               | 1998 | Am J Vet Res             | Khan                 | 8 | Back                 | USA | U Illinois                                              |                                  | Original | Laboratory   | Aetiology    |              | Meat  |
| 122 | Milk composition, somatic cell count, clinical and bacteriological investigation                                                                             | 1998 | Prakt Tierarz            | Wittko               | 3 | Beck                 | GER | U Leipzig                                               |                                  | Original | Field        | Aetiology    | Diagnosis    | Dairy |
| 123 | Use of benzothiazolone dihydrochloride for control of ovine mastitis                                                                                         | 1998 | Ind Vet J                | Shelkh               | 2 | Wilayat              | IND | U Kashmir                                               |                                  | Original | Field        | Treatment    |              | Dairy |
| 124 | <i>Streptococcus paraangitans</i> : new pathogen associated with asymptomatic mastitis in sheep                                                              | 1998 | Emerg Inf Dis            | Fernandez-Garayzabal | 6 | Dominguez            | ESP | U Madrid                                                |                                  | Original | Laboratory   | Aetiology    |              | Meat  |
| 125 | Heritability of test day somatic cell counts and its relationship with milk yield and protein percentage in dairy ewes                                       | 1998 | J Dairy Sci              | El-Saied             | 3 | San Primitivo        | ESP | EGY                                                     | U Cairo                          | Original | Field        | Risk factors | Diagnosis    | Dairy |
| 126 | Naturally occurring subclinical ovine mastitis associated with <i>Listeria monocytogenes</i>                                                                 | 1998 | Small Rumin Res          | Fthenakis            | 4 | Linde                | GRE | GER                                                     | U Leipzig                        | Original | Field        | Aetiology    |              | Dairy |
| 127 | Incidence risk and aetiology of mammary abnormalities in dry ewes in 10 flocks in Southern Greece                                                            | 1998 | Prev Vet Med             | Sarantis             | 5 | Fthenakis            | GRE | Aristotle U Thessaloniki                                | U Thessaly                       | Original | Field        | Aetiology    | Epidemiology | Dairy |
| 128 | The influence of ewe intramammary infection caused by coagulase negative staphylococci on the milk constituents total protein, albumin, potassium and sodium | 1998 | Anim Sci                 | Burriel              | 2 | Wagstaff             | GBR | U London                                                |                                  | Original | Field        | Effects      |              | Meat  |
| 129 | Adhesion of coagulase positive and coagulase negative staphylococci                                                                                          | 1999 | Small Rumin Res          | Burriel              | 1 |                      | GBR | U London                                                |                                  | Original | Laboratory   | Pathogenesis |              | Meat  |
| 130 | Prevalence and aetiology of subclinical mastitis in the Madrid region                                                                                        | 1999 | Small Rumin Res          | Las Heras            | 3 | Fernandez-Garayzabal | ESP | U Madrid                                                |                                  | Original | Field        | Aetiology    | Epidemiology | Dairy |
| 131 | Genetic parameters of lactation cell counts and milk and protein yield in dairy ewes                                                                         | 1999 | J Dairy Sci              | El-Saied             | 4 | San Primitivo        | ESP | EGY                                                     | U Cairo                          | Original | Field        | Risk factors |              | Dairy |

|     |                                                                                                                                                                          |      |                             |                |   |                      |     |                                                            |                                         |             |          |              |              |              |       |
|-----|--------------------------------------------------------------------------------------------------------------------------------------------------------------------------|------|-----------------------------|----------------|---|----------------------|-----|------------------------------------------------------------|-----------------------------------------|-------------|----------|--------------|--------------|--------------|-------|
| 132 | Effect of administration of vitamin E and selenium during the dry period                                                                                                 | 1999 | J Dairy Sci                 | Morgante       | 6 | Ranacci              | ITL | Inst Sperimentale Medica e Metodologia Clinica Veterinaria |                                         | New England | Original | Field        | Control      |              | Dairy |
| 133 | The intramammary inflammatory response of genetically resistant Merino ewes infected with <i>Haemonchus contortus</i>                                                    | 1999 | Int J Parasitol             | Thamsborg      | 5 | Lea                  | DEN | ALS                                                        | U Copenhagen                            |             | Original | Experimental | Pathogenesis |              | Meat  |
| 134 | The effect of experimentally induced subclinical mastitis on the milk yield of dairy ewes                                                                                | 1999 | Small Rumin Res             | Sarantis       | 4 | Fihnakis             | GRE |                                                            | Aristotele U Thessaloniki               |             | Original | Field        | Effects      |              | Dairy |
| 135 | The effect of experimental infectious mastitis on leukocyte subpopulations and cytokine production in non-lactating ewes                                                 | 1999 | Zhivt Vetrmed B             | Persson-Walker | 2 | Colditz              | SWE | ALS                                                        | U Uppsala                               |             | Original | Experimental | Pathogenesis |              | Meat  |
| 136 | Resistance patterns of ovine mastitis pathogens                                                                                                                          | 1999 | Bell Manch Trazart Wechs    | Winter         | 3 | Baumgartner          | AUT |                                                            | U Vienna                                |             | Original | Laboratory   | Treatment    |              | Meat  |
| 137 | Effect of intramammary infusion of beta-1,3-glucan or interleukin-2 on leukocyte subpopulations in mammary glands of sheep                                               | 1999 | Am J Vet Res                | Walker         | 2 | Colditz              | SWE | ALS                                                        | U Uppsala                               |             | Original | Experimental | Pathogenesis |              | Meat  |
| 138 | Outbreak of acute ovine mastitis associated with <i>Pseudomonas aeruginosa</i> infection                                                                                 | 1999 | Vet Rec                     | Las Heras      | 4 | Fernandez-Garayzabal | ESP |                                                            | U Madrid                                |             | Original | Field        | Aetiology    |              | Dairy |
| 139 | Effect of stocking density on ewes milk yield, udder health and microenvironment                                                                                         | 1999 | J Dairy Res                 | Sevi           | 5 | Muscio               | ITL |                                                            | U Foggia                                |             | Original | Field        | Risk factors |              | Dairy |
| 140 | Somatic cell counts determined by the Coulter or Fossomatic counter and their relationship to administration of oxytocin                                                 | 2000 | Small Rumin Res             | Burriel        | 1 |                      | GBR |                                                            | U London                                |             | Original | Laboratory   | Diagnosis    |              | Meat  |
| 141 | Extensive fibrinous pleurisy associated with <i>Streptococcus dysgalactiae</i>                                                                                           | 2000 | Vet Rec                     | Scott          | 1 |                      | GBR |                                                            | U Edinburgh                             |             | Original | Field        | Effects      |              | Meat  |
| 142 | The effect of tiludoxin administered to ewes prior to lambing on incidence of clinical mastitis                                                                          | 2000 | Can Vet J                   | Croft          | 6 | Dick                 | CDN |                                                            | U Guelph                                |             | Original | Field        | Control      |              | Meat  |
| 143 | Effects of parity on milk yield composition, somatic cell count, udder parameters and bacteria counts of Comisana ewes                                                   | 2000 | Small Rumin Res             | Sevi           | 5 | Annicchiarico        | ITL |                                                            | U Foggia                                |             | Original | Field        | Epidemiology |              | Dairy |
| 144 | Intramammary <i>Aspergillus fumigatus</i> infection in dairy ewes associated with antibiotic dry therapy                                                                 | 2000 | Vet Rec                     | Las Heras      | 8 | Fernandez-Garayzabal | ESP |                                                            | U Madrid                                |             | Original | Field        | Risk factors |              | Dairy |
| 145 | Field evaluation of flunixin meglumine in the supportive treatment of ovine mastitis                                                                                     | 2000 | J Vet Pharmacol Ther        | Fihnakis       | 1 |                      | GRE |                                                            | U Thessaly                              |             | Original | Field        | Treatment    |              | Dairy |
| 146 | Quality of ewe milk as affected by stocking density and litter treatment with bentonite                                                                                  | 2000 | Int J Food Sci              | Sevi           | 6 | Dell'Aquila          | ITL |                                                            | U Foggia                                |             | Original | Field        | Epidemiology |              | Dairy |
| 147 | Antimicrobial susceptibility of corynebacteria isolated from ewe's mastitis                                                                                              | 2001 | Int J Antimicrob Ag         | Fernandez      | 6 | Mosono               | ESP |                                                            | U Madrid                                |             | Original | Laboratory   | Treatment    |              | Dairy |
| 148 | Lack of association between retention of fetal membranes and mastitis in ewes                                                                                            | 2001 | Vet Rec                     | Leventides     | 3 | Tzota                | GRE |                                                            | U Thessaly                              |             | Original | Field        | Epidemiology |              | Dairy |
| 149 | Effect of slime on adherence of <i>Staphylococcus aureus</i> isolated from bovine and ovine mastitis                                                                     | 2001 | Vet Microbiol               | Aguilar        | 3 | Burried              | ISR |                                                            | U Zaragoza                              |             | Original | Laboratory   | Aetiology    | Pathogenesis | Dairy |
| 150 | Udder disease etiology, milk somatic cell counts and NAGase activity in Israeli Assaf sheep throughout lactation                                                         | 2001 | Small Rumin Res             | Leitner        | 8 | Saran                | ISR |                                                            | Ministry of Agriculture Israel          |             | Original | Field        | Aetiology    | Diagnosis    | Dairy |
| 151 | The role of coagulase negative <i>Staphylococcus</i> spp and associated somatic cell counts                                                                              | 2001 | J Dairy Sci                 | Pengow         | 1 | SLV                  | SVK |                                                            | U Ljubljana                             |             | Original | Field        | Aetiology    | Diagnosis    | Dairy |
| 152 | Outbreak of subclinical mastitis in a flock of dairy sheep associated with <i>Burkholderia cepacia</i> complex infection                                                 | 2001 | J Clin Microbiol            | Berraha        | 8 | Govan                | ESP | GBR                                                        | NIKER                                   |             | Original | Field        | Aetiology    |              | Dairy |
| 153 | Mastitis in ewes                                                                                                                                                         | 2001 | In Pract                    | Winter         | 1 |                      | GBR |                                                            | U Liverpool                             |             | Review   |              |              |              |       |
| 154 | Relationships among somatic cell count, California mastitis test, impedance and bacteriological status of milk in goats and sheep in early lactation                     | 2001 | Small Rumin Res             | McDougal       | 6 | Stratton             | NZL | USA                                                        | Animal Health Centre                    |             | Original | Field        | Aetiology    | Diagnosis    | Meat  |
| 155 | Mastitis of sheep and goats                                                                                                                                              | 2001 | Vet Clin NA Food Anim Pract | Meneses        | 2 | Ramanooom            | CDN |                                                            | U Guelph                                |             | Review   |              |              |              |       |
| 156 | Relationship between mammary gland infection and milk immune parameters in Sardinian breed ewes                                                                          | 2001 | Small Rumin Res             | Moroni         | 2 | Cacurri              | ITL |                                                            | U Milan                                 |             | Original | Field        | Pathogenesis | Diagnosis    | Dairy |
| 157 | Genetic analysis for mastitis resistance and milk somatic cell score in French Lacune dairy sheep                                                                        | 2001 | Gen Sel Evol                | Bartillet      | 5 | Jacquin              | FRA |                                                            | INRA                                    |             | Original | Field        | Risk factors |              | Dairy |
| 158 | Binding of a surface protein of <i>Staphylococcus aureus</i> to cultured ovine mammary gland epithelial cells                                                            | 2001 | Vet Microbiol               | Aguilar        | 2 | Burried              | ESP |                                                            | U Zaragoza                              |             | Original | Experimental | Pathogenesis |              | Dairy |
| 159 | Airspace effects on the yield and quality of ewe milk                                                                                                                    | 2001 | J Dairy Sci                 | Sevi           | 5 | Muscio               | ITL |                                                            | U Foggia                                |             | Original | Field        | Risk factors |              | Dairy |
| 160 | Udder health status of dairy flocks during one lactation period with special regards to infections caused by coagulase-negative staphylococci                            | 2002 | Wiener Tierarz Monats       | Winter         | 3 | Baumgartner          | AUT |                                                            | U Vienna                                |             | Original | Field        | Aetiology    |              | Meat  |
| 161 | Physiological range of milk contents and somatic cell count in milk of ewes with special regard to uua                                                                   | 2002 | Tierarz Prax Aus Gross Nutz | Flock          | 5 | Baumgartner          | AUT |                                                            | U Vienna                                |             | Original | Field        | Diagnosis    |              | Dairy |
| 162 | The effect of stage of lactation on milk quantity and number of somatic cells in sheep milk                                                                              | 2002 | MilchWissensch              | Antonac        | 5 | Samarzija            | CRO |                                                            | U Zagreb                                |             | Original | Field        | Risk factors |              | Dairy |
| 163 | Prevalence and etiology of subclinical mastitis in intensively managed flocks and related changes in the yield and quality of ewe milk                                   | 2002 | Small Rumin Res             | Albenzio       | 4 | Sevi                 | ITL |                                                            | U Foggia                                |             | Original | Field        | Aetiology    | Risk factors | Dairy |
| 164 | Unusual outbreak of clinical mastitis in dairy sheep caused by <i>Streptococcus equi</i> subsp <i>zooepidemicus</i>                                                      | 2002 | J Clin Microbiol            | Las Heras      | 6 | Fernandez-Garayzabal | ESP |                                                            | U Madrid                                |             | Original | Field        | Aetiology    |              | Dairy |
| 165 | Effect of infectious status and parity on somatic cell count and California mastitis test in pamponta dairy ewes                                                         | 2002 | J Vet Med B                 | Suarez         | 6 | Canavesio            | ARG |                                                            | Inst Nacional Tecnológico Agropecuaria  |             | Original | Field        | Diagnosis    |              | Meat  |
| 166 | Mammary pathogens and their relationship to somatic cell count                                                                                                           | 2002 | J Dairy Sci                 | Gonzalo        | 4 | San Primitivo        | ESP |                                                            | U Leon                                  |             | Original | Field        | Aetiology    | Diagnosis    | Dairy |
| 167 | Microbiological quantity and somatic cell count of ewe milk with special reference                                                                                       | 2002 | J Dairy Sci                 | Ariznabarrena  | 3 | Carrido              | ESP |                                                            | U Leon                                  |             | Original | Field        | Aetiology    |              | Dairy |
| 168 | Production and novel quantification of haemolysis produced by coagulase-negative staphylococci isolated from subclinical mastitis in sheep                               | 2002 | Microbiologica              | Kanellos       | 2 | Burriel              | GBR |                                                            | U London                                |             | Original | Laboratory   | Aetiology    |              | Meat  |
| 169 | Immunological responses of the lactating ewe udder following experimental challenge with <i>Staphylococcus epidermidis</i>                                               | 2002 | Vet Immunol Immunopathol    | Winter         | 2 | Colditz              | AUT | ALS                                                        | U Vienna                                |             | Original | Experimental | Pathogenesis |              | Meat  |
| 170 | Phagocytic capacity of leukocytes in sheep mammary secretions following weaning                                                                                          | 2002 | J Anat                      | J Anst         | 4 | Lee                  | AUS |                                                            | U Melbourne                             |             | Original | Experimental | Pathogenesis |              | Meat  |
| 171 | Physicochemical, microbiological and coagulating properties of ewe's milk produced on the Calabrian Mount Poro plateau                                                   | 2002 | Int J Dairy Technol         | Micari         | 5 | Cufari               | ITL |                                                            | U Reggio Calabria                       |             | Original | Field        | Diagnosis    |              | Dairy |
| 172 | DNA macrorestriction analysis by pulsed-field gel electrophoresis of <i>Pseudomonas aeruginosa</i> isolates from mastitis in dairy sheep                                 | 2002 | Vet Rec                     | Las Heras      | 6 | Fernandez-Garayzabal | ESP |                                                            | U Madrid                                |             | Original | Field        | Aetiology    |              | Dairy |
| 173 | Antibody responses in sheep vaccinated against <i>Staphylococcus aureus</i> mastitis: a comparison of two experimental vaccines containing different adjuvants           | 2002 | Vet Res Comm                | Tollerud       | 6 | Lund                 | NOR |                                                            | National Veterinary Institute Norway    |             | Original | Experimental | Control      |              | Meat  |
| 174 | Efficacy of dry-off treatment in sheep                                                                                                                                   | 2003 | Small Rumin Res             | Chaffer        | 7 | Saran                | ISR |                                                            | Kimron Veterinary Institute             |             | Original | Field        | Control      |              | Dairy |
| 175 | Therapeutic efficacy of tiludoxin in ovine mammary infections                                                                                                            | 2003 | Small Rumin Res             | Nacari         | 5 | De Mentis            | ITL |                                                            | U Messina                               |             | Original | Experimental | Treatment    |              | Dairy |
| 176 | Methicillin resistance in staphylococci isolated from subclinical mastitis in sheep                                                                                      | 2003 | Microbiologica              | Corrente       | 4 | Ventriglia           | ITL |                                                            | U Bari                                  |             | Original | Laboratory   | Treatment    |              | Dairy |
| 177 | New advances in epidemiology and control of ewe mastitis                                                                                                                 | 2003 | Liv Prod Sci                | Bergonier      | 2 | Berthelot            | FRA |                                                            | Ecole Nationale Veterinaire de Toulouse |             | Review   |              |              |              |       |
| 178 | Influence of pulsatation rate on udder health and teat thickness changes in dairy ewes                                                                                   | 2003 | J Dairy Sci                 | Peris          | 5 | Fernandez            | ESP |                                                            | U Valencia                              |             | Original | Field        | Risk factors |              | Dairy |
| 179 | Period prevalence and etiology of subclinical mastitis in Awassi sheep in southern Jordan                                                                                | 2003 | Small Rumin Res             | Al-Majali      | 2 | Jawabreh             | JOD |                                                            | Jordan U Science Technology             |             | Original | Field        | Aetiology    |              | Dairy |
| 180 | Leucotoxic activities of <i>Staphylococcus aureus</i> strains isolated from cows, ewes, and goats with mastitis: importance of LukMLuK-F-IV leukotoxin                   | 2003 | Clin Diagn Lab Immunol      | Rainard        | 5 | Pourel               | FRA |                                                            | INRA                                    |             | Original | Laboratory   | Aetiology    |              | Dairy |
| 181 | Genetic parameters for milk somatic cell scores and relationships with production traits in French Lacune dairy sheep                                                    | 2003 | J Dairy Sci                 | Rupp           | 4 | Bartillet            | FRA |                                                            | INRA                                    |             | Original | Field        | Risk factors |              | Dairy |
| 182 | Effects of litter management on airborne particulates in sheep in sheep houses and on the yield and quality of ewe milk                                                  | 2003 | Liv Prod Sci                | Sevi           | 5 | Contodourati         | ITL |                                                            | U Foggia                                |             | Original | Field        | Risk factors |              | Dairy |
| 183 | Dynamics of experimentally induced <i>Staphylococcus epidermidis</i> mastitis in East Friesian milk ewes                                                                 | 2003 | J Dairy Sci                 | Winter         | 4 | Colditz              | AUT | ALS                                                        | U Vienna                                |             | Original | Experimental | Pathogenesis |              | Meat  |
| 184 | Evaluation of diagnostic procedures for subclinical mastitis in meat-producing sheep                                                                                     | 2003 | J Dairy Res                 | Clements       | 3 | Pitzpatrick          | GBR |                                                            | U Glasgow                               |             | Original | Field        | Diagnosis    |              | Meat  |
| 185 | Serum amyloid A in the serum and milk of ewes with mastitis induced experimentally with <i>Staphylococcus epidermidis</i>                                                | 2003 | Vet Rec                     | Winter         | 3 | Walsh                | AUT | ALS                                                        | U Vienna                                |             | Original | Experimental | Pathogenesis | Diagnosis    | Meat  |
| 186 | Immune response, udder health and productive traits of machine milked and suckling ewes                                                                                  | 2003 | Small Rumin Res             | Albenzio       | 6 | Sevi                 | ITL |                                                            | U Foggia                                |             | Original | Experimental | Risk factors | Pathogenesis | Dairy |
| 187 | Udder infection and milk somatic cell count, NAGase activity and milk composition-fat, protein and lactose in Israeli-Assaf and Awassi sheep                             | 2003 | Small Rumin Res             | Leitner        | 8 | Saran                | ISR |                                                            | Kimron Veterinary Institute             |             | Original | Field        | Diagnosis    | Effects      | Dairy |
| 188 | Genetic parameters of somatic cell count in dairy sheep considering the type of mammary pathogen effect                                                                  | 2003 | J Anim Breed Gen            | Gonzalo        | 6 | San Primitivo        | ESP |                                                            | U Leon                                  |             | Original | Field        | Risk factors |              | Dairy |
| 189 | Mastitis of dairy small ruminants                                                                                                                                        | 2003 | Vet Rec                     | Bergonier      | 5 | Berthelot            | FRA |                                                            | Ecole Nationale Veterinaire de Toulouse |             | Review   |              |              |              |       |
| 190 | Study on frequency, etiology and some enzymatic activities of subclinical ovine mastitis in Urmia, Iran                                                                  | 2003 | Small Rumin Res             | Batavani       | 4 | Davoodi              | IRN |                                                            | U Urmia                                 |             | Original | Field        | Aetiology    |              | Dairy |
| 191 | Clinical and ultrasonographic findings in the mammary gland of sheep                                                                                                     | 2003 | NZ Vet J                    | Franz          | 4 | Baumgartner          | AUT |                                                            | U Vienna                                |             | Original | Field        | Diagnosis    |              | Meat  |
| 192 | Antimicrobial drug susceptibility of <i>Staphylococcus aureus</i> strains isolated from bovine and ovine mammary glands                                                  | 2003 | J Dairy Sci                 | Pengow         | 2 | Ceru                 | SLV |                                                            | U Ljubljana                             |             | Original | Field        | Treatment    |              | Dairy |
| 193 | Hard ewe's milk cheese manufactured from milk of three different groups of somatic cell counts                                                                           | 2003 | J Dairy Sci                 | Jaeggi         | 7 | Wendroff             | USA |                                                            | U Wisconsin                             |             | Original | Field        | Effects      |              | Dairy |
| 194 | Genotyping of <i>Staphylococcus aureus</i> from various sites on farms with dairy sheep using pulsed-field gel electrophoresis                                           | 2003 | Vet Microbiol               | Vautour        | 5 | Pypin                | FRA |                                                            | AFSSA                                   |             | Original | Laboratory   | Aetiology    |              | Dairy |
| 195 | Genetic analysis of somatic cell count and milk traits in Manchega ewes: Mean lactation and test-day approaches                                                          | 2003 | Liv Prod Sci                | Serrano        | 4 | Jurado               | ESP |                                                            | INIA                                    |             | Original | Field        | Risk factors |              | Dairy |
| 196 | A case of sporadic ovine mastitis caused by <i>Listeria monocytogenes</i> and its effect on contamination of raw milk and raw-milk cheeses produced in the on-farm dairy | 2003 | J Dairy Res                 | Scheder        | 5 | Wagner               | AUT |                                                            | U Vienna                                |             | Original | Field        | Aetiology    |              | Dairy |
| 197 | Influence of vacuum level and overmilking on udder health and teat thickness changes in dairy ewes                                                                       | 2003 | J Dairy Sci                 | Peris          | 6 | Fernandez            | ESP |                                                            | U Valencia                              |             | Original | Field        | Risk factors |              | Dairy |
| 198 | Physical examination of the mammary gland and milk indicators of udder health in East-Hammond dairy sheep                                                                | 2004 | Tierarz Prax                | Fahr           | 4 | Al-Hammad            | GER |                                                            | Paul Lister Institute                   |             | Original | Field        | Diagnosis    |              | Meat  |

|     |                                                                                                                                                                      |      |                           |                   |   |                      |     |                                             |                                                     |                              |              |              |              |       |       |
|-----|----------------------------------------------------------------------------------------------------------------------------------------------------------------------|------|---------------------------|-------------------|---|----------------------|-----|---------------------------------------------|-----------------------------------------------------|------------------------------|--------------|--------------|--------------|-------|-------|
| 199 | Interrelationships between the activities of the plasmin system in goats and sheep experiencing subclinical mastitis, casein degradation and milk yield              | 2004 | S Afr Anim J Sci          | Silankwe          | 4 | Merin                | ISR | Agri Research Organisation Israel           |                                                     | Original                     | Field        | Pathogenesis |              | Dairy |       |
| 200 | Changes in milk composition as affected by subclinical mastitis                                                                                                      | 2004 | S Afr Anim J Sci          | Merin             | 5 | Letimer              | ISR | Agri Research Organisation Israel           | Kimron Veterinary Institute                         | Original                     | Field        | Effects      |              | Dairy |       |
| 201 | Factors influencing milk quantity and quality in Assaf sheep and goat crossbreds                                                                                     | 2004 | S Afr Anim J Sci          | Letimer           | 7 | Saran                | ISR | Kimron Veterinary Institute                 |                                                     | Original                     | Field        | Effects      |              | Dairy |       |
| 202 | Clinical and histopathological aspects of naturally occurring mastitis caused by <i>Listeria monocytogenes</i> in cattle and ewes                                    | 2004 | J Vet Med B               | Winter            | 7 | Wagner               | AUT | U Vienna                                    |                                                     | Original                     | Field        | Aetiology    | Pathogenesis | Dairy |       |
| 203 | Changes in milk composition as affected by subclinical mastitis in sheep                                                                                             | 2004 | J Dairy Sci               | Letimer           | 8 | Silankwe             | ISR | Agri Research Organisation Israel           | Kimron Veterinary Institute                         | Original                     | Field        | Effects      |              | Dairy |       |
| 204 | Experimentally induced teat stenosis in dairy ewes: clinical, pathological and ultrasonographic features                                                             | 2004 | J Comp Pathol             | Mavrogiani        | 6 | Talziotou            | GRE | U Thessaly                                  | Aristotle U Thessaloniki                            | Original                     | Experimental | Pathogenesis |              | Dairy |       |
| 205 | Evaluation of molecular and immunological techniques for the diagnosis of mammary apertillitis in ewes                                                               | 2004 | Vet Microbiol             | Garcia            | 5 | Blasco               | ESP | U Madrid                                    |                                                     | Original                     | Laboratory   | Diagnosis    |              | Dairy |       |
| 206 | Effects of selective and complete dry therapy on prevalence of intramammary infection and on milk yield in the subsequent lactation in dairy ewes                    | 2004 | J Dairy Res               | Gonzalo           | 4 | San Primitivo        | ESP | U Leon                                      |                                                     | Original                     | Field        | Control      |              | Dairy |       |
| 207 | In vitro adherence and invasion of ovine mammary epithelium by <i>Mannheimia (Pasteurella) haemolytica</i>                                                           | 2004 | Vet J                     | Vilela            | 3 | Moogan               | GBR | U Bristol                                   | U Lisbon                                            | Original                     | Experimental | Pathogenesis |              | Meat  |       |
| 208 | Effects of lambing season and stage of lactation on ewe milk quality                                                                                                 | 2004 | Small Rumin Res           | Sevi              | 5 | Muscio               | ITL | U Foggia                                    |                                                     | Original                     | Field        | Risk factors |              | Dairy |       |
| 209 | Effects of somatic cell count and stage of lactation on the plasmin activity and chesse-making properties of ewe milk                                                | 2004 | J Dairy Sci               | Albenzio          | 6 | Sevi                 | ITL | U Foggia                                    |                                                     | Original                     | Field        | Effects      |              | Dairy |       |
| 210 | Antibiotic resistance and epidemiological typing of <i>Staphylococcus aureus</i> strains from ovine and rabbit mastitis                                              | 2004 | Int J Antimicrob Ag       | Goni              | 6 | Gomez                | ESP | U Zaragoza                                  |                                                     | Original                     | Laboratory   | Aetiology    | Treatment    | Dairy |       |
| 211 | Case report: high prevalence of ovine mastitis, caused by coagulase-negative staphylococci and predisposed by increased gossypoid consumption                        | 2004 | Small Rumin Res           | Fthenakis         | 5 | Tzora                | GRE | U Thessaly                                  | TEI Epirus                                          | Original                     | Field        | Epidemiology | Risk factors | Dairy |       |
| 212 | Phenotypic and genotypic characteristics of <i>Staphylococcus aureus</i> isolates from raw bulk-tank milk samples of goats and sheep                                 | 2004 | Vet Microbiol             | Scherrer          | 5 | Stephan              | SWI | U Zurich                                    |                                                     | Original                     | Laboratory   | Aetiology    |              | Dairy |       |
| 213 | Bacteriology and somatic cell counts in milk samples from ewes on a Scottish farm                                                                                    | 2004 | Can J Vet Res             | Hartharan         | 4 | Keefe                | CIN | U Prince Edward Island                      | Moredun Research Institute                          | Original                     | Field        | Aetiology    | Diagnosis    | Meat  |       |
| 214 | <i>Strepptococcus equi</i> subsp <i>ruminantium</i> subsp <i>nov.</i> , isolated from mastitis in small ruminants                                                    | 2004 | Int J Syst Evol Microbiol | Fernandez         | 7 | Fernandez-Garayzaral | ISP | U Madrid                                    |                                                     | Original                     | Laboratory   | Aetiology    |              | Dairy |       |
| 215 | The effects of inoculation of <i>Mannheimia haemolytica</i> into the teat of lactating ewes                                                                          | 2005 | Vet Res                   | Mavrogiani        | 8 | Sarasis              | GRE | U Thessaly                                  | Aristotle U Thessaloniki                            | Original                     | Experimental | Pathogenesis |              | Dairy |       |
| 216 | Investigation of antioxidant enzymes and some biochemical parameters in ewes with gangrenous mastitis                                                                | 2005 | Turk J Vet Anim Sci       | Cetin             | 5 | Korkmaz              | TUR | U Harran                                    |                                                     | Original                     | Field        | Diagnosis    |              | Dairy |       |
| 217 | Phenotypic and genetic analysis of udder health using SCC in Valle del Belice dairy sheep                                                                            | 2005 | Ital J Anim Sci           | Portolano         | 5 | Giaccone             | ITL | U Palermo                                   |                                                     | Original                     | Field        | Risk factors |              | Dairy |       |
| 218 | Evaluation of a combined vaccine against staphylococcal mastitis in ewes                                                                                             | 2005 | Bull Vet Inst Pulawy      | Hadimik           | 4 | Sayin                | TUR | U Selcuk                                    |                                                     | Original                     | Field        | Control      |              | Dairy |       |
| 219 | Somatic cells in sheep milk                                                                                                                                          | 2005 | Med Vet                   | Olechowicz        | 2 | Jaskowski            | POL | U Krakow                                    |                                                     | Original                     | Field        | Diagnosis    |              | Dairy |       |
| 220 | Factors of variation influencing bulk tank somatic cell count in dairy sheep                                                                                         | 2005 | J Dairy Sci               | Gonzalo           | 7 | San Primitivo        | ESP | U Leon                                      |                                                     | Original                     | Field        | Risk factors |              | Dairy |       |
| 221 | Genetic diversity of <i>Staphylococcus aureus</i> isolated from ovine intramammary infections in Norway                                                              | 2005 | Vet Microbiol             | Mork              | 5 | Waage                | NOR | National Veterinary Institute Norway        | U Oslo                                              | Original                     | Laboratory   | Aetiology    |              | Meat  |       |
| 222 | Studies on the use of Bta-Gard spray                                                                                                                                 | 2005 | Small Rumin Res           | Klingonair        | 3 | Baumgartner          | AUT | U Vienna                                    |                                                     | Original                     | Field        | Control      |              | Dairy |       |
| 223 | Investigation and control of mastitis outbreaks caused by <i>Pseudomonas aeruginosa</i> in a sheep flock and a goat                                                  | 2005 | Berl Munch Tierarz Wochs  | Yeraham           | 7 | Goshen               | ISR | U Jerusalem                                 |                                                     | Original                     | Field        | Aetiology    | Control      | Dairy |       |
| 224 | Genetic parameters of udder traits, somatic cell score, and milk yield in Lataxa sheep                                                                               | 2005 | J Dairy Sci               | Leparra           | 2 | Ugarte               | ISP | NEIKER                                      |                                                     | Original                     | Field        | Risk factors |              | Dairy |       |
| 225 | Characterization of 26 isolates of <i>Staphylococcus aureus</i> , predominantly from dairy sheep, using four different techniques of molecular epidemiology          | 2005 | J Vet Diagn Invest        | Vautour           | 6 | Pepin                | FRA | AFSSA                                       |                                                     | Original                     | Laboratory   | Aetiology    |              | Dairy |       |
| 226 | Comparison of <i>Staphylococcus aureus</i> genotypes recovered from cases of bovine, ovine, and caprine mastitis                                                     | 2005 | J Clin Microbiol          | Mork              | 5 | Waage                | NOR | National Veterinary Institute Norway        | U Oslo                                              | Original                     | Laboratory   | Aetiology    |              | Dairy |       |
| 227 | Relationship between welfare and udder health indicators in dairy ewes                                                                                               | 2006 | Vet Res Comm              | Caropese          | 4 | Sevi                 | ITL | U Foggia                                    |                                                     | Original                     | Field        | Risk factors |              | Dairy |       |
| 228 | Teat disorders predispose ewes to clinical mastitis                                                                                                                  | 2006 | Vet Res                   | Mavrogiani        | 5 | Fthenakis            | GRE | U Thessaly                                  |                                                     | Original                     | Experimental | Pathogenesis |              | Dairy |       |
| 229 | Toll-like receptor gene polymorphism and its relationship with somatic cell concentration and natural bacterial infections of the mammary gland in sheep             | 2006 | Folia Microbiol           | Swiderk           | 6 | Mikala               | POL | U Warsaw                                    | U Kosice                                            | Academy of Sciences Slovakia | Original     | Laboratory   | Risk factors |       | Dairy |
| 230 | Relationship between blood lymphocyte phenotype, DRB1 (MHC class II) gene polymorphism and somatic cell count in ewe milk                                            | 2006 | Bull Vet Inst Pulawy      | Swiderk           | 4 | Gruszczyńska         | POL | U Warsaw                                    |                                                     | Original                     | Field        | Pathogenesis |              | Dairy |       |
| 231 | Use of somatic cell counts and California Mastitis Test results from udder halves milk samples to detect subclinical intramammary infection in Awassi sheep          | 2006 | Small Rumin Res           | Lafi              | 1 | KDD                  | JOR | Jordan U Science Technology                 |                                                     | Original                     | Field        | Diagnosis    |              | Dairy |       |
| 232 | Physiological and pathological threshold of somatic cell counts in ewe milk                                                                                          | 2006 | Small Rumin Res           | Berthelot         | 5 | Bergonier            | FRA | Ecole Nationale Veterinaire de Toulouse     |                                                     | Original                     | Field        | Diagnosis    |              | Dairy |       |
| 233 | Relationship between somatic cell counts and the properties of yoghurt made from ewes' milk                                                                          | 2006 | Int Dairy J               | Vivar-Quintana    | 3 | Revilla              | ESP | U Salamanca                                 |                                                     | Original                     | Field        | Effects      |              | Dairy |       |
| 234 | Effects of hand milking on the bacterial flora of the mammary gland and teat duct                                                                                    | 2006 | J Dairy Res               | Mavrogiani        | 5 | Fthenakis            | GRE | U Thessaly                                  |                                                     | Original                     | Field        | Risk factors |              | Dairy |       |
| 235 | Description and validation of a novel technique to study the bacterial flora of the teat duct of ewes                                                                | 2006 | Small Rumin Res           | Mavrogiani        | 3 | Fthenakis            | GRE | U Thessaly                                  |                                                     | Original                     | Field        | Diagnosis    |              | Dairy |       |
| 236 | Molecular typing of <i>Staphylococcus aureus</i> isolated from cows, goats and sheep with intramammary infections on the basis of gene polymorphisms and toxin genes | 2006 | J Vet Med B               | Vernecati         | 7 | Monesi               | ITL | U Milan                                     |                                                     | Original                     | Laboratory   | Aetiology    |              | Dairy |       |
| 237 | The potential of measuring serum amyloid A in individual ewe milk and in farm bulk milk for monitoring udder health on sheep dairy farms                             | 2006 | Res Vet Sci               | Winter            | 4 | Baumgartner          | AUT | U Vienna                                    |                                                     | Original                     | Field        | Pathogenesis | Diagnosis    | Dairy |       |
| 238 | Effects of machine-milking on the bacterial flora of teat duct and mammary gland of ewes                                                                             | 2006 | J Vet Med B               | Skoufos           | 4 | Tzora                | GRE | TEI Epirus                                  |                                                     | Original                     | Field        | Pathogenesis |              | Dairy |       |
| 239 | Clinical aspects and characteristics of the milk in sheep with mastitis                                                                                              | 2007 | Peq Vet Brazil            | Santos            | 4 | Smas                 | BRA | U Pernambuco                                |                                                     | Original                     | Experimental | Pathogenesis |              | Dairy |       |
| 240 | Detection of quantitative trait loci influencing somatic cell score in Spanish Churra sheep                                                                          | 2007 | J Dairy Sci               | Gutierrez-Gil     | 7 | Aranza               | ESP | U Leon                                      |                                                     | Original                     | Field        | Risk factors |              | Dairy |       |
| 241 | Relationship between beta lactoglobulin and subclinical mastitis in Valle del Belice sheep breed                                                                     | 2007 | Ital J Anim Sci           | Gigli             | 6 | Maione               | ITL | U Palermo                                   |                                                     | Original                     | Field        | Risk factors |              | Dairy |       |
| 242 | Effect of weather conditions on somatic cell score in Sicilian Valle del Belice ewes                                                                                 | 2007 | Ital J Anim Sci           | Finochiano        | 3 | Portolano            | ITL | U Palermo                                   |                                                     | Original                     | Field        | Risk factors |              | Dairy |       |
| 243 | Drug resistance in isolated bacteria from milk of sheep and goats with subclinical mastitis                                                                          | 2007 | Iran J Vet Res            | Ebrahimi          | 3 | Karimi               | IRN | U Shahrood                                  |                                                     | Original                     | Laboratory   | Treatment    |              | Dairy |       |
| 244 | Mastitis in small ruminants                                                                                                                                          | 2007 | Small Rumin Res           | Cortinas          | 7 | Gonzalo              | ESP | U Murcia                                    | U Leon                                              | Review                       |              |              |              |       |       |
| 245 | Somatic cells of goat and sheep milk: analytical, sanitary, productive and technological aspects                                                                     | 2007 | Small Rumin Res           | Raynal-Ljutovac   | 4 | Gonzalo              | FRA | ESP                                         | Inst Technologie-Produits Laitiers Caprins          | U Leon                       | Review       |              |              |       |       |
| 246 | Monitoring goat and sheep milk somatic cell counts                                                                                                                   | 2007 | Small Rumin Res           | Paape             | 8 | Miller               | USA | Ministry of Agriculture USA                 |                                                     | Review                       |              |              |              |       |       |
| 247 | Economic weights of somatic cell score in dairy sheep                                                                                                                | 2007 | Animal                    | Leggana           | 5 | Amanz                | ESP | NEIKER                                      |                                                     | Original                     | Field        | Effects      |              | Dairy |       |
| 248 | Genetic parameters for milk somatic cell score and relationships with production traits in prapinuous dairy sheep                                                    | 2007 | J Dairy Sci               | Riggio            | 5 | Bovenhuis            | ITL | NED                                         | U Palermo                                           | U Wageningen                 | Original     | Field        | Risk factors |       | Dairy |
| 249 | Udder health and somatic cell counts in ewes                                                                                                                         | 2007 | Agartarschung             | Mauer             | 2 | Schaeren             | SWI | Forsch Sanstalt Agroscope Liebefeld Posieux |                                                     | Original                     | Field        | Diagnosis    |              | Dairy |       |
| 250 | The effect of machine or hand milking on milk production, composition and SCC                                                                                        | 2007 | Small Rumin Res           | Stiapis           | 1 |                      | GRE | Aristotle U Thessaloniki                    |                                                     | Original                     | Field        | Diagnosis    | Effects      | Dairy |       |
| 251 | Clinical, bacteriological, cytological and pathological features of teat disorders in ewes                                                                           | 2007 | J Vet Med A               | Mavrogiani        | 2 | Fthenakis            | GRE | U Thessaly                                  |                                                     | Original                     | Field        | Risk factors |              | Dairy |       |
| 252 | Bacterial flora and risk of infection of the ovine teat duct and mammary gland throughout lactation                                                                  | 2007 | Vet Vet Med               | Mavrogiani        | 3 | Fthenakis            | GRE | U Thessaly                                  |                                                     | Original                     | Field        | Risk factors |              | Dairy |       |
| 253 | Genetics of disease resistance in sheep and goats                                                                                                                    | 2007 | Small Rumin Res           | Bishop            | 2 | Morris               | GBR | NZL                                         | Roslin Institute                                    | AgResearch New Zealand       | Review       |              |              |       |       |
| 254 | Characterization of <i>Staphylococcus aureus</i> isolates from buffaloes, bovine, ovine, and caprine milk samples collected in Rio de Janeiro State, Brazil          | 2007 | Appl Environ Microbiol    | Aires-De-Sousa    | 6 | de Lencastre         | PCR | USA                                         | New U Lisbon                                        | U Rockefeller                | Original     | Laboratory   | Aetiology    |       | Dairy |
| 255 | Presence of subepithelial lymphoid nodules in the teat of ewes                                                                                                       | 2007 | Anal Histol Embryol       | Mavrogiani        | 5 | Fthenakis            | GRE | U Thessaly                                  |                                                     | Original                     | Laboratory   | Pathogenesis |              | Dairy |       |
| 256 | The bacterial flora in the teat duct of ewes can protect against and can cause mastitis                                                                              | 2007 | Vet Res                   | Fragkou           | 5 | Fthenakis            | GRE | U Thessaly                                  |                                                     | Original                     | Experimental | Pathogenesis |              | Dairy |       |
| 257 | Presence of sub-epithelial lymphoid tissues in the teat of ewe-lambs and adult ewes                                                                                  | 2007 | Small Rumin Res           | Fragkou           | 7 | Fthenakis            | GRE | U Thessaly                                  |                                                     | Original                     | Laboratory   | Pathogenesis |              | Dairy |       |
| 258 | Effect of dietary zinc upon in vitro bacterial adherence to ovine mammary epithelium                                                                                 | 2007 | Res Med Vet               | Saianda           | 5 | Vilela               | POR | U Lisbon                                    |                                                     | Original                     | Laboratory   | Pathogenesis |              | Dairy |       |
| 259 | Time-to-event analysis of mastitis at first lactation in Valle del Belice ewes                                                                                       | 2007 | Liv Sci                   | Portolano         | 5 | Maione               | ITL | U Palermo                                   |                                                     | Original                     | Field        | Risk factors |              | Dairy |       |
| 260 | Influence of somatic cell count and based on capillary electrophoretic protein profiles of ewes' milk: a chemometric study                                           | 2007 | J Dairy Sci               | Rodriguez-Nogales | 3 | Revilla              | ESP | U Salamanca                                 | U Valladolid                                        | Original                     | Field        | Effects      |              | Dairy |       |
| 261 | Differences in susceptibility to <i>Mannheimia haemolytica</i> -associated mastitis                                                                                  | 2007 | J Dairy Res               | Fragkou           | 8 | Fthenakis            | GRE | U Thessaly                                  |                                                     | Original                     | Experimental | Pathogenesis |              | Dairy |       |
| 262 | Effect of intramammary infection in Bergamasca meat sheep on milk parameters and lamb growth                                                                         | 2007 | J Dairy Res               | Maroni            | 4 | Bettcher             | ITL | U Milan                                     | Institute of Agricultural Biology and Biotechnology | Original                     | Field        | Effects      |              | Dairy |       |
| 263 | Clinical mastitis in ewes, bacteriology, epidemiology and clinical features                                                                                          | 2007 | Acta Vet Scand            | Mork              | 5 | Svliand              | NOR | National Veterinary Institute Norway        |                                                     | Original                     | Field        | Aetiology    |              | Dairy |       |
| 264 | Characterization of <i>Staphylococcus aureus</i> isolates recovered from dairy sheep farms (agr group, adherence, slime, resistance to antibiotics)                  | 2007 | Small Rumin Res           | Vautour           | 6 | D'Almeida            | FRA | AFSSA                                       | Archat Hospital                                     | Original                     | Laboratory   | Aetiology    |              | Dairy |       |
| 265 | Study of the leucocyte formula of milk in the ewes of race Ouled-Djalil in the east of Algeria                                                                       | 2007 | Afr J Agr Res             | Laouadja-Sellam   | 3 | Gharani              | ALG | U Badji Mokhtar                             |                                                     | Original                     | Field        | Diagnosis    |              | Dairy |       |

|     |                                                                                                                                                                                                           |      |                               |                   |    |              |     |     |                                               |                                           |          |              |              |              |       |      |
|-----|-----------------------------------------------------------------------------------------------------------------------------------------------------------------------------------------------------------|------|-------------------------------|-------------------|----|--------------|-----|-----|-----------------------------------------------|-------------------------------------------|----------|--------------|--------------|--------------|-------|------|
| 266 | Pseudomonas aeruginosa mastitis outbreaks in sheep and goat flocks                                                                                                                                        | 2007 | Vet Immun Immunopathol        | Leitner           | 2  | Kiffacks     | ISR |     | Kimron Veterinary Institute                   |                                           | Original | Experimental | Control      |              | Dairy |      |
| 267 | Program for the control of subclinical mastitis in dairy Chios breed ewes during lactation                                                                                                                | 2007 | Small Rumin Res               | Klousis           | 4  | Boscos       | GRE |     | Aristotle U Thessaloniki                      |                                           | Original | Field        | Control      |              | Dairy |      |
| 268 | Phenotypic and genotypic characterization of Pseudomonas aeruginosa strains isolated from mastitis                                                                                                        | 2007 | J Dairy Res                   | Sela              | 6  | Leitner      | ISR |     | Kimron Veterinary Institute                   | Agri Research Organisation Israel         | Original | Laboratory   | Aetiology    |              | Dairy |      |
| 269 | Treat lesions predispose to invasion of the ovine mammary gland by Mannheimia haemolytica                                                                                                                 | 2007 | J Comp Pathol                 | Fragkou           | 5  | Fthenakis    | GRE |     | U Thessaly                                    |                                           | Original | Experimental | Risk factors | Pathogenesis | Dairy |      |
| 270 | Studies on mastitis in sheep, caused by Coxiella burnetii                                                                                                                                                 | 2007 | Biotechnol Biochemol Equip    | Martinov          | 1  |              | BUL |     | National Veterinary Institute Bulgaria        |                                           | Original | Field        | Aetiology    |              | Dairy |      |
| 271 | Patterns of maternal-offspring behaviour of dairy sheep and potential association with mammary health                                                                                                     | 2007 | Can J Anim Sci                | Gougoulis         | 9  | Fthenakis    | GRE |     | U Thessaly                                    |                                           | Original | Field        | Pathogenesis |              | Dairy |      |
| 272 | Order of sheep entry into the milking parlour and its relationship with their milkability                                                                                                                 | 2007 | Appl Anim Behav Sci           | Villagra          | 5  | Fernandez    | ESP |     | U Valencia                                    |                                           | Original | Field        | Risk factors |              | Dairy |      |
| 273 | Profile and evolution of antimicrobial resistance of ovine mastitis pathogens (1995-2004)                                                                                                                 | 2008 | Small Rumin Res               | Loflai            | 6  | Leori        | ITL |     | Inst Zooprofilattico Sardegna                 | National Reference Centre Sheep & Goats   | Original | Laboratory   | Treatment    |              | Dairy |      |
| 274 | Estimate of milk and curd yield loss of sheep and goats with intramammary infection and its relation to somatic cell count                                                                                | 2008 | Small Rumin Res               | Leitner           | 3  | Merin        | ISR |     | Kimron Veterinary Institute                   | Agri Research Organisation Israel         | Original | Field        | Effects      |              | Dairy |      |
| 275 | Dry-off treatment of Awassi sheep: efficacy as a management tool for improving milk quantity and quality                                                                                                  | 2008 | Small Rumin Res               | Shwimmer          | 6  | Leitner      | ISR |     | Kimron Veterinary Institute                   | Ministry of Agriculture Israel            | Original | Field        | Control      |              | Dairy |      |
| 276 | Disease threats to sheep associated with intensification of pastured farming                                                                                                                              | 2008 | NZ Vet J                      | Ridler            | 1  |              | GBR |     | U London                                      |                                           | Review   |              |              |              |       |      |
| 277 | Ovine <i>Listeria monocytogenes</i> mastitis and human exposure via fresh cheese from raw milk: the impact of farm management, milking and cheese manufacturing practices                                 | 2008 | MilchWissenschaft             | Schoder           | 6  | Wagner       | AUT |     | U Vienna                                      |                                           | Original | Experimental | Effects      |              | Dairy |      |
| 278 | Subclinical mastitis in sheep: etiology, epidemiology and diagnosis methods                                                                                                                               | 2008 | Kaf Univ Vet Fakult Derg      | Yagci             | 1  |              | TUR |     | U Kirikkale                                   |                                           | Review   |              |              |              |       |      |
| 279 | Antimicrobial use in the Alberta sheep industry                                                                                                                                                           | 2008 | Can J Vet Res                 | Avey              | 7  | McEwen       | CDN |     | Public Health Agency Canada                   | Ministry of Agriculture Canada            | Original | Field        | Treatment    |              | Dairy |      |
| 280 | Effects of lamb suckling on the bacterial flora of teat duct and mammary gland of ewes                                                                                                                    | 2008 | Reprod Dom Anim               | Gougoulis         | 6  | Fthenakis    | GRE |     | U Thessaly                                    |                                           | Original | Experimental | Pathogenesis |              | Dairy |      |
| 281 | Breeding for resistance to mastitis in United Kingdom sheep: a review and economic appraisal                                                                                                              | 2008 | Vet Rec                       | Conington         | 4  | Bunger       | GBR |     | Scottish Agricultural College                 |                                           | Review   |              |              |              |       |      |
| 282 | Subclinical mastitis changes the patterns of maternal-offspring behaviour in dairy sheep                                                                                                                  | 2008 | Vet J                         | Gougoulis         | 6  | Fthenakis    | GRE |     | U Thessaly                                    |                                           | Original | Experimental | Effects      |              | Dairy |      |
| 283 | EC and CMT detect subclinical mastitis in dairy sheep but less sensitive than in dairy cows                                                                                                               | 2008 | Landbauforschung Völkernode   | Barth             | 2  | Knappslein   | GER |     | Federal Research Inst For Rural areas Germany | Max Ruber Inst                            | Original | Field        | Diagnosis    |              | Dairy |      |
| 284 | Effects of experimental challenge of ewes with Mannheimia haemolytica on subsequent milk composition                                                                                                      | 2008 | J Dairy Res                   | Fragkou           | 12 | Fthenakis    | GRE |     | U Thessaly                                    |                                           | Original | Experimental | Effects      |              | Dairy |      |
| 285 | Evaluation of a prophylactic method against clinical mastitis in Santa Ines ewes                                                                                                                          | 2008 | Arq Bras Med Vet Zoot         | Melo              | 6  | Mata         | BRA |     | U Brasilia                                    | Agricultural Research Organisation Brazil | Original | Field        | Control      |              | Dairy |      |
| 286 | Cellular and microbiological profile of Santa Ines ewes in the lactation and the post-weaning period.                                                                                                     | 2008 | Psq Vet Brazil                | Blagitz           | 11 | Della Libera | BRA |     | U Sao Paulo                                   |                                           | Original | Field        | Diagnosis    |              | Dairy |      |
| 287 | Influence of an intramammary infusion at drying-off of combined penicillins, benzathine penicillin, and framycetin sulfate on intramammary infections and somatic cell counts in dairy sheep              | 2008 | J Dairy Sci                   | Lauage            | 2  | Gonzalo      | ESP |     | U Leon                                        |                                           | Original | Field        | Control      |              | Dairy |      |
| 288 | Risk factors and impacts of clinical and subclinical mastitis in commercial meat-producing sheep flocks in Quebec, Canada                                                                                 | 2008 | Prev Vet Med                  | Anonault          | 4  | Belanger     | CDN |     | U Montreal                                    |                                           | Original | Field        | Risk factors | Effects      | Meat  |      |
| 289 | Individual animal risk factors for clinical mastitis in meat sheep in Norway                                                                                                                              | 2008 | Prev Vet Med                  | Waage             | 2  | Vain         | NOR |     | U Oslo                                        | Ministry of Agriculture Norway            | Original | Field        | Risk factors |              | Meat  |      |
| 290 | Prevalence and etiology of subclinical mastitis in Awassi dairy ewes in southern Turkey                                                                                                                   | 2009 | Turk J Vet Anim Sci           | Ergan             | 8  | Demir        | TUR |     | U Mustafa Kemal                               |                                           | Original | Field        | Aetiology    | Epidemiology | Dairy |      |
| 291 | Ultrasonographic examination of the ovine udder                                                                                                                                                           | 2009 | Therarzt Prakt Aus Gross Nutz | Hapler            | 3  | Woband       | GER |     | U Giessen                                     |                                           | Original | Experimental | Diagnosis    |              | Meat  |      |
| 292 | Estimation of (co)variance components of nematode parasites resistance and somatic cell count in dairy sheep                                                                                              | 2009 | Ital J Anim Sci               | Sechi             | 7  | Casu         | ITL |     | AGRS Sardegna                                 |                                           | Original | Field        | Risk factors |              | Dairy |      |
| 293 | Study of beta-defensin polymorphisms in Valle del Belice dairy sheep                                                                                                                                      | 2009 | Ital J Anim Sci               | Monteleone        | 4  | Portolano    | ITL |     | U Palermo                                     |                                           | Original | Field        | Risk factors |              | Dairy |      |
| 294 | Usefulness of the E-test for the determination of the susceptibility of Staphylococcus sp. isolated from milk of sheep and goats with subclinical mastitis to ampicillin and amoxicillin-clavulanic acid  | 2009 | Bull Vet Inst Palawy          | Kivenci           | 4  | Sarbay       | TUR |     | U Ataturk                                     | U Mustafa Kemal                           | Original | Laboratory   | Treatment    |              | Dairy |      |
| 295 | The effect of stress synchronization treatments on somatic cell count of transitional-anestrous Awassi ewes' milk                                                                                         | 2009 | Trop Anim Hlth and Prod       | Talaha            | 3  | Ababneh      | JOD |     | Jordan U Science Technology                   |                                           | Original | Field        | Risk factors |              | Dairy |      |
| 296 | Response to somatic cell count based selection for mastitis resistance in a divergent selection experiment in sheep                                                                                       | 2009 | J Dairy Sci                   | Rupp              | 7  | Foucar       | FRA |     | INRA                                          | U Toulouse                                | Original | Experimental | Risk factors |              | Dairy |      |
| 297 | Pseudomonas spp. isolated in dairy herds. A new protocol with PCR real time by using "DUAL FRET" probes for ovine mastitis                                                                                | 2009 | Large Anim Rev                | Orru              | 9  | Orru         | ITL |     | U Cagliari                                    | Inst Zooprofilattico Sardegna             | Original | Field        | Diagnosis    |              | Dairy |      |
| 298 | Risks of antibiotic residues in milk following intramammary and intramuscular treatments in dairy sheep                                                                                                   | 2009 | Analyt Chim Acta              | Pengow            | 2  | Kirbis       | SLV |     | U Ljubljana                                   |                                           | Original | Field        | Treatment    |              | Dairy |      |
| 299 | Protection from Staphylococcus aureus mastitis associated with poly-N-acetyl-beta-1,6 glucosamine specific antibody production using lactin-embedded bacteria                                             | 2009 | Vaccine                       | Perez             | 16 | Amorena      | ESP |     | U Navarra                                     | SIA DGA-Zaragoza                          | Original | Experimental | Control      |              | Dairy |      |
| 300 | Simultaneous lack of catilase and beta-txin in Staphylococcus aureus leads to increased intracellular survival in macrophages and epithelial cells and to attenuated virulence in murine and ovine models | 2009 | Microbiol SCM                 | Martinez-Palgarin | 4  | de la Fuente | ESP |     | U Madrid                                      |                                           | Original | Laboratory   | Pathogenesis |              | Dairy |      |
| 301 | Association between a case study of asymptomatic ovine faecal mastitis and the contamination of cost cheese and cheese processing environment with Listeria monocytogenes in Portugal                     | 2009 | Foodborne Pathog Dis          | Pintado           | 6  | McLaughlin   | FCR |     | U Lisbon                                      | Ministry of Health UK                     | Original | Field        | Effects      |              | Dairy |      |
| 302 | Pharmacokinetics and efficacy of tetraplatin against intramammary infections in sheep                                                                                                                     | 2009 | Vet Rec                       | Naccari           | 8  | Naccari      | ITL |     | U Messina                                     | U Milan                                   | Original | Field        | Treatment    |              | Dairy |      |
| 303 | Lamb mortality in an outbreak of Yersinia pseudotuberculosis mastitis, as a collateral effect of colostrum feeding for Leinfries-control                                                                  | 2009 | Small Rumin Res               | Juste             | 5  | de Henedia   | ESP |     | NEIKER                                        |                                           | Original | Field        | Aetiology    | Effects      | Dairy |      |
| 304 | Development of serological proteomic analysis of mastitis by Staphylococcus aureus in ewes                                                                                                                | 2009 | J Microbiol Meth              | Le Loir           | 8  | Le Loir      | FRA |     | INRA                                          |                                           | Original | Laboratory   | Aetiology    |              | Dairy |      |
| 305 | Difference in virulence between Staphylococcus aureus isolates causing gangrenous mastitis versus subclinical mastitis in a dairy sheep flock                                                             | 2009 | Vet Res                       | Vantor            | 8  | Lindsay      | FRA | GBR | AFSSA                                         | U London                                  | Original | Field        | Pathogenesis |              | Dairy |      |
| 306 | Molecular typing of Staphylococcus aureus strains from ovine mastitis by pulsed-field gel electrophoresis and polymerase chain reaction based on coagulase and protein A gene polymorphisms               | 2009 | J Vet Diagn Invest            | Cilici            | 5  | Segal        | TUR |     | U Onsekiz Mayis                               | U Amnaya                                  | Original | Laboratory   | Aetiology    |              | Dairy |      |
| 307 | Effect of somatic cell count level on functional longevity in Valle del Belice dairy sheep assessed using survival analysis                                                                               | 2009 | J Dairy Sci                   | Riggio            | 5  | van Arendonk | ITL | NED | U Palermo                                     | U Wageningen                              | Original | Field        | Diagnosis    |              | Dairy |      |
| 308 | Endemic contagious agalactia in sheep and goats: clinical evaluation, treatment and vaccination                                                                                                           | 2010 | J Anim Vet Adv                | Macun             | 6  | Kalin        | TUR |     | U Kirikkale                                   | U Firat                                   | Original | Field        | Treatment    |              | Dairy |      |
| 309 | Clinical findings in sheep farms affected by recurrent bacterial mastitis                                                                                                                                 | 2010 | Small Rumin Res               | Marogna           | 5  | Leori        | ITL |     | Inst Zooprofilattico Sardegna                 |                                           | Original | Field        | Aetiology    |              | Dairy |      |
| 310 | Phenotypic and genetic relationships between udder morphology and udder health in dairy ewes                                                                                                              | 2010 | Small Rumin Res               | Casu              | 4  | Carta        | ITL |     | U Sassari                                     |                                           | Original | Field        | Risk factors |              | Dairy |      |
| 311 | The role of lactate dehydrogenase, alkaline phosphatase and aspartate aminotransferase in the diagnosis of subclinical intramammary infections in dairy sheep and goats                                   | 2010 | J Dairy Res                   | Katsoulos         | 6  | Kritas       | GRE |     | U Thessaly                                    | Aristotle U Thessaloniki                  | Original | Field        | Diagnosis    |              | Dairy |      |
| 312 | The induction of lymphoid follicle-like structures in the ovine teat duct following experimental infection with Mannheimia haemolytica                                                                    | 2010 | Vet J                         | Fragkou           | 12 | Fthenakis    | GRE |     | U Thessaly                                    |                                           | Original | Experimental | Pathogenesis |              | Dairy |      |
| 313 | Proteinogram and serum concentrations of copper, iron and zinc in Santa Ines ewes with Staphylococcus aureus experimentally induced mastitis.                                                             | 2010 | Psq Vet Brazil                | Costa             | 8  | de Mendonca  | BRA |     | U Pernambuco                                  |                                           | Original | Experimental | Pathogenesis | Diagnosis    | Dairy |      |
| 314 | Management and sanitary practices in ewe dairy farms and bulk milk somatic cell count                                                                                                                     | 2010 | Spanish J Agr Res             | Molina            | 5  | Molina       | ESP |     | U Castilla La Mancha                          | U Valencia                                | Original | Field        | Risk factors | Diagnosis    | Dairy |      |
| 315 | Genotypic characterization of coagulase-negative staphylococci isolated from sheep milk in Slovakia                                                                                                       | 2010 | Acta Vet Brno                 | Philippincova     | 4  | Tvarnick     | SLK |     | U Kosice                                      |                                           | Original | Laboratory   | Aetiology    |              | Dairy |      |
| 316 | Genetic parameters for somatic cell score according to udder infection status in Valle del Belice dairy sheep and impact of imperfect diagnosis of infection                                              | 2010 | Gen Sel Evol                  | Riggio            | 4  | Bishop       | ITL | NED | U Palermo                                     | U Wageningen                              | Original | Field        | Risk factors |              | Dairy |      |
| 317 | Influences of somatic cell count on milk composition and dairy farm profitability                                                                                                                         | 2010 | Int J Dairy Technol           | El-Tahawy         | 2  | El-Far       | EGY |     | U Alexandria                                  |                                           | Original | Field        | Effects      |              | Dairy |      |
| 318 | Identification of coagulase-negative staphylococci isolated from ovine milk samples by PCR-RFLP of 16S rDNA and gap genes                                                                                 | 2010 | Vet Microbiol                 | Omi               | 7  | Tolla        | ITL |     | Inst Zooprofilattico Sardegna                 |                                           | Original | Laboratory   | Aetiology    |              | Dairy |      |
| 319 | Small ruminant mastitis in Brazil                                                                                                                                                                         | 2010 | Psq Vet Brazil                | Petinato          | 3  | da Costa     | BRA |     | U Vale Sao Francisco                          |                                           | Original | Field        | Aetiology    |              | Dairy |      |
| 320 | Etiology and profile of antimicrobial sensitivity of bacteria from small ruminant mastitis and relationship of diagnostic techniques.                                                                     | 2010 | Psq Vet Brazil                | Petinato          | 5  | da Costa     | BRA |     | U Vale Sao Francisco                          |                                           | Original | Laboratory   | Treatment    |              | Dairy |      |
| 321 | Mannheimia species associated with ovine mastitis                                                                                                                                                         | 2010 | J Clin Microbiol              | Omalicki          | 4  | Browning     | AUS |     | U Melbourne                                   |                                           | Original | Laboratory   | Aetiology    |              | Meat  |      |
| 322 | Acute mastitis induces upregulation of expression of plasminogen activator-related genes by blood monocytes and neutrophils in dairy cows                                                                 | 2010 | Vet Immun Immunopathol        | Theodorou         | 6  | Pollis       | GRE |     | Agricultural U Athens                         |                                           | Original | Laboratory   | Pathogenesis |              | Dairy |      |
| 323 | Staphylococcus aureus mastitis in Texel sheep associated with suckling twins                                                                                                                              | 2010 | Vet Rec                       | Koop              | 3  | Rietsema     | NED |     | U Utrecht                                     |                                           | Original | Field        | Risk factors |              | Meat  |      |
| 324 | Ecology and antimicrobial susceptibilities of bacteria isolated from sheep with mastitis in northeastern Para, Brazil.                                                                                    | 2010 | Psq Vet Brazil                | Silva             | 8  | Barbosa      | BRA |     | U Para                                        |                                           | Original | Laboratory   | Aetiology    | Treatment    | Dairy |      |
| 325 | Antimicrobial susceptibility of coagulase-negative staphylococci isolated from meat-producing ewes with mastitis                                                                                          | 2010 | Arq Bras Med Vet Zoot         | Della Libera      | 8  | Gomes        | BRA |     | U Sao Paulo                                   |                                           | Original | Laboratory   | Treatment    |              | Dairy |      |
| 326 | Effect of freezing and preincubation on isolation of coagulase-negative staphylococci from ewes' milk samples                                                                                             | 2011 | Semina Clin Agar              | Blagitz           | 7  | Della Libera | BRA |     | U Sao Paulo                                   |                                           | Original | Laboratory   | Aetiology    |              | Dairy |      |
| 327 | Effects of intramammary infections on somatic cell count and milk yield in Sarda sheep                                                                                                                    | 2011 | NZ Vet J                      | Caccuro           | 7  | Bronzo       | ITL |     | U Milan                                       | U Sassari                                 | Original | Field        | Effects      |              | Dairy |      |
| 328 | Sheep with scrapie and mastitis transmit infectious prions through the milk                                                                                                                               | 2011 | J Virol                       | Ligios            | 11 | Sigurdson    | ITL | SWI | USA                                           | Inst Zooprofilattico Sardegna             | U Zurich | Original     | Field        | Effects      |       | Meat |
| 329 | Rates and determinants of antimicrobial use, including extra-label, on Ontario sheep farms                                                                                                                | 2011 | Can J Vet Res                 | Moon              | 7  | Meneses      | CDN |     | U Guelph                                      |                                           | Original | Field        | Treatment    |              | Dairy |      |
| 330 | Investigation of toxin genes of Staphylococcus aureus strains isolated from gangrenous mastitis in ewes                                                                                                   | 2011 | Kaf Univ Vet Fakult Derg      | Tel               | 5  | Demir        | TUR |     | U Harran                                      | U Mustafa Kemal                           | Original | Laboratory   | Aetiology    |              | Dairy |      |
| 331 | Characterization of ovine mastitis in Santa Ines sheep in the north of Minas Gerais: occurrence, etiology and epidemiology                                                                                | 2011 | Rev Ciéncias                  | de Moraes         | 6  | Duarte       | BRA |     | U Minas Gerais                                |                                           | Original | Field        | Aetiology    | Risk factors | Dairy |      |
| 332 | Antimicrobial resistance of Staphylococcus aureus and coagulase negative staphylococci isolated from mastitis milk samples from sheep and goats                                                           | 2011 | Schweizer Arch Therarzt       | Kuntz             | 6  | Zweifel      | SWI |     | U Zurich                                      |                                           | Original | Laboratory   | Treatment    |              | Meat  |      |

|     |                                                                                                                                                                                                                            |      |                             |                 |    |              |     |      |     |                               |                                           |          |              |              |              |           |
|-----|----------------------------------------------------------------------------------------------------------------------------------------------------------------------------------------------------------------------------|------|-----------------------------|-----------------|----|--------------|-----|------|-----|-------------------------------|-------------------------------------------|----------|--------------|--------------|--------------|-----------|
| 333 | Differential leucocyte count for ewe milk with low and high somatic cell count                                                                                                                                             | 2011 | J Dairy Res                 | Albenzio        | 2  | Caroprese    | ITL |      |     | U Foggia                      |                                           | Original | Laboratory   | Diagnosis    |              | Dairy     |
| 334 | Selenium, vitamin E and vitamin A blood concentrations in dairy sheep flocks with increased or low clinical mastitis incidence                                                                                             | 2011 | Small Rumin Res             | Gladinis        | 7  | Fthenakis    | GRE |      |     | Aristotle U Thessaloniki      | U Thessaly                                | Original | Field        | Risk factors |              | Dairy     |
| 335 | Staphylococcus aureus seroproteomes discriminate ruminant isolates causing mild or severe mastitis                                                                                                                         | 2011 | Vet Res                     | Le Marechal     | 15 | Lo Lait      | FRA |      |     | INRA                          | ANSES                                     | Original | Laboratory   | Pathogenesis |              | Dairy     |
| 336 | Antimicrobial susceptibility and population structure of Staphylococcus epidermidis associated with ovine mastitis                                                                                                         | 2011 | Vet Microbiol               | Onni            | 4  | Tela         | ITL |      |     | Inst Zooprofilattico Sardegna |                                           | Original | Laboratory   | Aetiology    | Treatment    | Dairy     |
| 337 | Transmission of Mannheimia haemolytica from the tonsils of lambs to the teat of ewes during suckling                                                                                                                       | 2011 | Vet Microbiol               | Fragkou         | 8  | Fthenakis    | GRE |      |     | U Thessaly                    |                                           | Original | Experimental | Aetiology    | Risk factors | Dairy     |
| 338 | Principles of mastitis treatment in sheep and goats                                                                                                                                                                        | 2011 | Vet Clin NA Food Anim Pract | Mavrogiani      | 4  | Fthenakis    | GRE |      |     | U Thessaly                    |                                           | Review   |              |              |              | Dairy     |
| 339 | Effects of glandular bacterial infection and stage of lactation on milk clotting parameters: comparison among cows, goats and sheep                                                                                        | 2011 | Int Dairy J                 | Leitner         | 3  | Silankove    | ISR |      |     | Kimron Veterinary Institute   | Agri Research Organisation Israel         | Original | Field        | Effects      |              | Dairy     |
| 340 | Influence of storage and preservation on microbiological quality of silo ovine milk                                                                                                                                        | 2011 | J Dairy Sci                 | de Carnica      | 3  | Gozalzo      | ESP |      |     | U Leon                        |                                           | Original | Field        | Aetiology    | Risk factors | Dairy     |
| 341 | Transcriptomic analysis of milk somatic cells in mastitis resistant and susceptible sheep upon challenge with Staphylococcus epidermidis and Staphylococcus aureus                                                         | 2011 | BMC Genomics                | Bonnefont       | 11 | Rupp         | FRA |      |     | INRA                          | U Toulouse                                | Original | Laboratory   | Risk factors |              | Dairy     |
| 342 | Genome sequences of two Staphylococcus aureus ovine strains that induce severe (strain O11) and mild (strain O46) mastitis                                                                                                 | 2011 | J Bacteriol                 | Le Marechal     | 10 | Lo Lait      | FRA |      |     | INRA                          | ANSES                                     | Original | Laboratory   | Aetiology    | Pathogenesis | Dairy     |
| 343 | Impact of intramammary antimicrobial dry treatment and teat sanitation on somatic cell count and intramammary infection in dairy ewes                                                                                      | 2011 | Small Rumin Res             | Spanu           | 3  | Ruegg        | USA |      |     | U Wisconsin                   |                                           | Original | Field        | Control      |              | Dairy     |
| 344 | Strengthening insights into host responses to mastitis infection in ruminants by combining heterogeneous microarray data sources                                                                                           | 2011 | BMC Genomics                | Genini          | 25 | Grufta       | ITL | USA  | FRA | Faeco Tecnologico Padano      | U Pennsylvania                            | Original | Laboratory   | Pathogenesis |              | Dairy     |
| 345 | Novel sequence types (STs) of Staphylococcus aureus isolates causing clinical and subclinical mastitis in flocks of sheep in the northeast of Brazil                                                                       | 2011 | J Dairy Res                 | de Almeida      | 4  | Mamirauka    | BRA |      |     | U Sao Paulo                   |                                           | Original | Laboratory   | Aetiology    | Pathogenesis | Dairy     |
| 346 | Preliminary investigation into the effect of freezing and a cryoprotectant on the recovery of mastitis pathogens from ewe milk                                                                                             | 2011 | J Dairy Sci                 | Smith           | 4  | Green        | GBR |      |     | U Warwick                     |                                           | Original | Laboratory   | Aetiology    |              | Meat      |
| 347 | Cellular dynamics and microbiological quality of milk of Santa Ines ewes accompanied during lactation                                                                                                                      | 2011 | Pesq Vet Brazil             | Gaarana         | 8  | De Mendonca  | BRA |      |     | U Pernambuco                  |                                           | Original | Field        | Diagnosis    |              | Dairy     |
| 348 | Effect of subclinical mastitis on proteolysis in ovine milk                                                                                                                                                                | 2011 | J Dairy Sci                 | Marti de Olivos | 5  | Molina       | ESP |      |     | U Miguel Hernandez            | U Valencia                                | Original | Experimental | Effects      |              | Dairy     |
| 349 | Molecular basis of virulence in Staphylococcus aureus mastitis                                                                                                                                                             | 2011 | Flou One                    | Le Marechal     | 16 | Lait         | FRA |      |     | INRA                          | ANSES                                     | Original | Laboratory   | Pathogenesis |              | Dairy     |
| 350 | The role of Mannheimia species in ovine mastitis                                                                                                                                                                           | 2011 | Vet Microbiol               | Omekci          | 4  | Joanne       | AUS |      |     | U Melbourne                   |                                           | Review   |              |              |              | Dairy     |
| 351 | Isolation of microbial pathogens of subclinical mastitis from raw sheep's milk of Epirus (Greece) and their role in its hygiene                                                                                            | 2011 | Anarobe                     | Fotou           | 9  | Ioannina     | GRE |      |     | U Ioannina                    | TEE Epirus                                | Original | Field        | Aetiology    |              | Dairy     |
| 352 | The importance of staphylococci and threshold value of somatic cell count for diagnosis of sub-clinical mastitis in Pirak sheep at mid-lactation                                                                           | 2011 | Reprod Dom Anim             | Ozenc           | 6  | Dogan        | TUR |      |     | U Afyon                       |                                           | Original | Field        | Diagnosis    |              | Dairy     |
| 353 | Somatic cell count and California Mastitis Test as a diagnostic tool for subclinical mastitis in ewes                                                                                                                      | 2011 | Acta Scient Vet             | Pradise         | 10 | Schmidt      | BRA |      |     | U Rio Grande do Sul           | U Pelotas                                 | Original | Field        | Diagnosis    |              | Dairy     |
| 354 | Antimicrobial susceptibility, presence of resistance genes and biofilm formation in coagulase-negative staphylococci isolated from subclinical sheep mastitis                                                              | 2012 | Kat Univ Vet Fakult Derg    | Ergun           | 6  | Boyar        | TUR |      |     | U Mustafa Kemal               |                                           | Original | Laboratory   | Aetiology    | Diagnosis    | Dairy     |
| 355 | Identifying the bacteria causing ovine gangrenous mastitis and detection of Staphylococcus aureus in gangrenous milk by PCR                                                                                                | 2012 | Kat Univ Vet Fakult Derg    | Tel             | 2  | Bozkaya      | TUR |      |     | U Harran                      |                                           | Original | Field        | Aetiology    |              | Dairy     |
| 356 | Identification and antibiotic sensitivity of the causative organisms of sub-clinical mastitis in sheep and goats                                                                                                           | 2012 | Pak Vet J                   | Islam           | 7  | Kim          | KOR | BCID |     | U Shonkuk                     | Inst Livestock Research Bangladesh        | Original | Field        | Aetiology    | Treatment    | Dairy     |
| 357 | Somatic cell counts and total bacterial counts in bulk tank of small ruminants                                                                                                                                             | 2012 | Sloven Vet Res              | Olechowicz      | 2  | Jakovcic     | POL |      |     | U Poznan                      |                                           | Original | Field        | Diagnosis    |              | Dairy     |
| 358 | Detection of staphylococcal enterotoxins, methicillin-resistant and Panton-Valentine leukocidin genes in coagulase-negative staphylococci isolated from cows and ewes with subclinical mastitis                            | 2012 | Trop Anim Hlth and Prod     | Unal            | 2  | Cnar         | TUR |      |     | U Kirikkale                   |                                           | Original | Laboratory   | Aetiology    |              | Dairy     |
| 359 | Panton-Valentine leukocidin and some coxins of Staphylococcus aureus and antimicrobial susceptibility profiles of staphylococci isolated from milks of small ruminants                                                     | 2012 | Trop Anim Hlth and Prod     | Unal            | 6  | Yildirim     | TUR |      |     | U Kirikkale                   |                                           | Original | Laboratory   | Aetiology    |              | Dairy     |
| 360 | Genetic susceptibility to S. aureus mastitis in sheep: differential expression of mammary epithelial cells in response to live bacteria or supernatant                                                                     | 2012 | Physiol Genom               | Bonnefont       | 8  | Foucras      | FRA |      |     | U Toulouse                    | INRA                                      | Original | Laboratory   | Pathogenesis |              | Dairy     |
| 361 | Lactation stage and udder health status of Santa Ines ewes                                                                                                                                                                 | 2012 | Arq Brasil Med Vet Zoot     | Blagitz         | 9  | Dalla Libera | BRA |      |     | U Sao Paulo                   |                                           | Original | Field        | Risk factors |              | Dairy     |
| 362 | Clonal diversity of Staphylococcus aureus originating from the small ruminants goats and sheep                                                                                                                             | 2012 | Vet Microbiol               | Pavero          | 6  | Aausrup      | DEN | ESP  |     | Technical U Denmark           | U Madrid                                  | Original | Laboratory   | Aetiology    |              | Dairy     |
| 363 | Investigation of the antibiotic resistance and biofilm formation of Staphylococcus aureus strains isolated from gangrenous mastitis of ewes                                                                                | 2012 | Acta Vet Hung               | Tel             | 5  | Demir        | TUR |      |     | U Harran                      | U Mustafa Kemal                           | Original | Laboratory   | Aetiology    |              | Dairy     |
| 364 | Detection of Mycobacterium avium subsp paratuberculosis in intestinal and mammary tissues and in lymph nodes of sheep with different techniques and its relationship with enteric lesions                                  | 2012 | Small Rumin Res             | Pozizao         | 2  | Remoni       | ITL |      |     | U Camerino                    |                                           | Original | Field        | Aetiology    |              | Dairy     |
| 365 | Staphylococcus aureus proteins differentially recognized by the ovine immune response in mastitis or nasal carriage                                                                                                        | 2012 | Vet Microbiol               | Seyffert        | 13 | Lo Lait      | FRA | BRA  |     | INRA                          | U Minas Gerais                            | Original | Laboratory   | Aetiology    |              | Dairy     |
| 366 | Effects of intra-mammary bacterial infection with coagulase negative staphylococci and stage of lactation on shedding of epithelial cells and infiltration of leukocytes into milk: Comparison among cows, goats and sheep | 2012 | Vet Immunol Immunopathol    | Leitner         | 6  | Silankove    | ISR |      |     | Kimron Veterinary Institute   | Agri Research Organisation Israel         | Original | Experimental | Pathogenesis |              | Dairy     |
| 367 | Immune competence of the mammary gland as affected by somatic cell and pathogenic bacteria in ewes with subclinical mastitis                                                                                               | 2012 | J Dairy Sci                 | Albenzio        | 5  | Ciliberti    | ITL |      |     | U Foggia                      |                                           | Original | Experimental | Pathogenesis |              | Dairy     |
| 368 | "Milk-drop syndrome of ewes": investigation of the causes in dairy sheep in Greece                                                                                                                                         | 2012 | Small Rumin Res             | Gladinis        | 8  | Fthenakis    | GRE |      |     | Aristotle U Thessaloniki      | U Thessaly                                | Original | Field        | Aetiology    |              | Dairy     |
| 369 | Molecular epidemiology of Mannheimia haemolytica and Mannheimia glucosida associated with ovine mastitis                                                                                                                   | 2012 | J Vet Diagn Invest          | Omekci          | 4  | Barber       | AUS |      |     | U Melbourne                   |                                           | Original | Laboratory   | Aetiology    |              | Meat      |
| 370 | Antimicrobial resistance of Staphylococcus spp. from small ruminant mastitis in Brazil                                                                                                                                     | 2012 | Pesq Vet Brazil             | Franca          | 8  | Costa        | BRA |      |     | U Vale Sao Francisco          |                                           | Original | Laboratory   | Treatment    |              | Dairy     |
| 371 | Long-term study of environmental effects on test-day somatic cell count and milk yield in Manchega sheep                                                                                                                   | 2012 | Small Rumin Res             | Atias           | 7  | Perez-Guzman | ESP |      |     | U Leon                        | Council Agriculture and Environment Spain | Original | Field        | Risk factors |              | Dairy     |
| 372 | Subclinical mastitis caused by Staphylococcus coagulase negative in meat-producing sheep                                                                                                                                   | 2012 | Arq Brasil Med Vet Zoot     | Tojada          | 6  | Timm         | BRA |      |     | U Pelotas                     |                                           | Original | Field        | Aetiology    |              | Meat      |
| 373 | A cohort study of the associations between udder conformation, milk somatic cell count, and lamb weight in suckler ewes                                                                                                    | 2012 | J Dairy Sci                 | Huntley         | 4  | Green        | GBR |      |     | U Warwick                     |                                           | Original | Field        | Effects      |              | Meat      |
| 374 | Somatic cell count in small ruminants: friend or foe?                                                                                                                                                                      | 2012 | Small Rumin Res             | Souza           | 6  | Cerequeira   | BRA |      |     | U Minas Gerais                |                                           | Review   |              |              |              | Dairy     |
| 375 | Effects of drying-off procedure of ewes' udder, with intramammary antibiotic administration, in subsequent mammary infection and development of mastitis                                                                   | 2012 | J Hill Vet Med Soc          | Petridis        | 6  | Fthenakis    | GRE |      |     | U Thessaly                    |                                           | Original | Experimental | Control      |              | Dairy     |
| 376 | Tissue distribution of endotoxaemia after intramammary or simulated systemic administration in isolated perfused sheep udders                                                                                              | 2012 | Am J Vet Res                | Cadenas         | 7  | Viehoz       | ESP |      |     | U Leon                        |                                           | Original | Experimental | Treatment    |              | Dairy     |
| 377 | Molecular characterization of enterotoxigenic and borderline oxacillin resistant Staphylococcus strains from ovine milk                                                                                                    | 2012 | Food Microbiol              | Pavillo         | 6  | Columbo      | ITL |      |     | U Roma                        |                                           | Original | Laboratory   | Aetiology    |              | Dairy     |
| 378 | Survey of accessory gene regulator (agr) groups and TSST-1 encoding gene (ts) in Staphylococcus aureus isolated from ewes with mastitis in the northwest of Iran                                                           | 2013 | Iran J Vet Res              | Saei            | 3  | Zadeh        | IRN |      |     | U Urmia                       |                                           | Original | Laboratory   | Aetiology    |              | Dairy     |
| 379 | Peripheral blood and milk leukocytes subsets of lactating Sarda ewes                                                                                                                                                       | 2013 | Ital J Anim Sci             | Bonelli         | 7  | Nicolussi    | ITL |      |     | Inst Zooprofilattico Sardegna |                                           | Original | Field        | Pathogenesis |              | Dairy     |
| 380 | Comparative analysis of agr groups and virulence genes among sub-clinical and clinical mastitis Staphylococcus aureus isolates from sheep flocks of the Northeast of Brazil                                                | 2013 | Bras J Microbiol            | de Almeida      | 4  | Mamirauka    | BRA |      |     | U Sao Paulo                   |                                           | Original | Laboratory   | Pathogenesis |              | Dairy     |
| 381 | Phenotypic and molecular characterization of isolates of Staphylococcus spp. obtained from sheep milk Chapisco-SC                                                                                                          | 2013 | Seminaria Ciem Agrar        | Agnot           | 8  | Grazdaru     | BRA |      |     | U Santa Catarina              |                                           | Original | Laboratory   | Aetiology    |              | Dairy     |
| 382 | Etology of mastitis in native goats and sheep born and raised in Brazilian semi-arid biome                                                                                                                                 | 2013 | Med Vet Recife              | Silva           | 9  | Mota         | BRA |      |     | U Pernambuco                  |                                           | Original | Field        | Aetiology    |              | Dairy     |
| 383 | Estimation of genetic and phenotypic parameters for bacteriological status of the udder, somatic cell score, and milk yield in dairy sheep using a threshold animal model                                                  | 2013 | Liv Sci                     | Tokove          | 3  | Portofano    | ITL |      |     | U Palermo                     |                                           | Original | Field        | Risk factors |              | Dairy     |
| 384 | Relationship among specific bacterial counts and total bacterial and somatic cell counts and factors influencing their variation in ovine bulk tank milk                                                                   | 2013 | J Dairy Sci                 | de Carnica      | 7  | Gozalzo      | ESP |      |     | U Leon                        |                                           | Original | Field        | Risk factors |              | Diagnosis |
| 385 | Comparative molecular analysis of ovine and bovine Streptococcus uberis isolates                                                                                                                                           | 2013 | J Dairy Sci                 | Gilchrist       | 5  | Fontaine     | GBR |      |     | Moredun Research Institute    |                                           | Original | Laboratory   | Aetiology    |              | Dairy     |
| 386 | Molecular screening of ovine mastitis in different breeds                                                                                                                                                                  | 2013 | J Dairy Sci                 | Guerreiro       | 5  | Duarte       | POR |      |     | BPfja                         | U Aveiro                                  | Original | Field        | Aetiology    |              | Dairy     |
| 387 | Effects of drying-off procedure of ewes' udder in subsequent mammary infection and development of mastitis                                                                                                                 | 2013 | Small Rumin Res             | Petridis        | 10 | Fthenakis    | GRE |      |     | U Thessaly                    |                                           | Original | Experimental | Control      |              | Dairy     |
| 388 | Consequences of reduced vitamin A administration on mammary health of dairy ewes                                                                                                                                           | 2013 | Small Rumin Res             | Koutsoumpas     | 8  | Karatzias    | GRE |      |     | Aristotle U Thessaloniki      |                                           | Original | Field        | Risk factors |              | Dairy     |
| 389 | Outbreak of mastitis in sheep caused by multi-drug resistant Enterococcus faecalis in Sardinia, Italy                                                                                                                      | 2013 | Epidemiol Infect            | Sanciu          | 6  | Rappelli     | ITL |      |     | U Sassari                     |                                           | Original | Field        | Aetiology    |              | Dairy     |
| 390 | Methodology variations in milk somatic cell count from Santa Ines ewes                                                                                                                                                     | 2013 | Cienc Rural                 | Blagitz         | 7  | Dalla Libera | BRA |      |     | U Sao Paulo                   |                                           | Original | Field        | Diagnosis    |              | Dairy     |
| 391 | Ovine subclinical mastitis: Proteomic analysis of whey and milk fat globules unveils putative diagnostic biomarkers in milk                                                                                                | 2013 | J Proteom                   | Chiardola       | 10 | Bonda        | ITL |      |     | U Perugia                     | National Research Council Italy           | Original | Field        | Pathogenesis |              | Dairy     |
| 392 | Staphylococcus aureus proteins differentially produced in ewe gangrenous mastitis or ewe milk                                                                                                                              | 2013 | Vet Microbiol               | Le Marechal     | 9  | Even         | FRA |      |     | INRA                          | ANSES                                     | Original | Laboratory   | Pathogenesis |              | Dairy     |
| 393 | Receiver-operating characteristic curves for somatic cell scores and California mastitis test in Valle del Belice dairy sheep                                                                                              | 2013 | Vet J                       | Riggio          | 4  | Portofano    | ITL | NED  |     | U Palermo                     | U Wageningen                              | Original | Field        | Diagnosis    |              | Dairy     |
| 394 | Mastitis detection in sheep by infrared thermography                                                                                                                                                                       | 2013 | Res Vet Sci                 | Martins         | 7  | McManus      | BRA |      |     | U Rio Grande do Sul           |                                           | Original | Field        | Diagnosis    |              | Dairy     |
| 395 | Proteolysis and partial dephosphorylation of casein are affected by high somatic cell counts in sheep milk                                                                                                                 | 2013 | Food Res Inter              | Pinto           | 9  | Chianese     | ITL |      |     | U Napoli                      |                                           | Original | Field        | Effects      |              | Dairy     |
| 396 | Production and release of antimicrobial and immune defense proteins by mammary epithelial cells following Streptococcus uberis infection of sheep                                                                          | 2013 | Infect Immun                | Addis           | 10 | Schianchi    | ITL |      |     | Ponto Conto Research          | U Sassari                                 | Original | Field        | Pathogenesis |              | Dairy     |
| 397 | Energy, protein and mineral metabolism in Santa Ines ewes, both healthy and with subclinical mastitis                                                                                                                      | 2013 | Pesq Vet Brazil             | da Silva        | 6  | de Mendonca  | BRA |      |     | U Pernambuco                  |                                           | Original | Field        | Effects      |              | Dairy     |
| 398 | Staphylococcus aureus and Escherichia coli prevalence in ovine bulk tank milk                                                                                                                                              | 2013 | Small Rumin Res             | de Carnica      | 5  | Gozalzo      | ESP |      |     | U Leon                        |                                           | Original | Field        | Aetiology    |              | Dairy     |
| 399 | Study on the possible survival of Staphylococcus chromogenes through the dry period in dairy ewes                                                                                                                          | 2013 | Small Rumin Res             | Klissia         | 6  | Boscos       | GRE |      |     | Aristotle U Thessaloniki      |                                           | Original | Field        | Pathogenesis |              | Dairy     |

|     |                                                                                                                                                                                                                                 |      |                            |                 |    |                   |     |     |                                          |                                          |          |              |              |              |       |
|-----|---------------------------------------------------------------------------------------------------------------------------------------------------------------------------------------------------------------------------------|------|----------------------------|-----------------|----|-------------------|-----|-----|------------------------------------------|------------------------------------------|----------|--------------|--------------|--------------|-------|
| 400 | Analysis of somatic cell counts and risk factors associated with occurrence of bacteria in ewes of different primary purposes                                                                                                   | 2013 | Liv Sci                    | Kern            | 4  | Krieter           | GER |     | U Kiel                                   |                                          | Original | Field        | Diagnosis    | Dairy        | Meat  |
| 401 | Use of milk amyloid A in the diagnosis of subclinical mastitis in dairy ewes                                                                                                                                                    | 2013 | J Dairy Res                | Miglio          | 7  | Mareca            | ITL |     | U Perugia                                | Inst Zooprofilattico Umbria e Marche     | Original | Field        | Diagnosis    | Dairy        |       |
| 402 | Quantification of milk yield and composition changes as affected by subclinical mastitis during the current lactation in sheep                                                                                                  | 2013 | J Dairy Sci                | Marti de Olivos | 4  | Peris             | ESP |     | U Miguel Hernandez                       | U Valencia                               | Original | Experimental | Effects      | Dairy        |       |
| 403 | Clinical findings related to intramammary infections in meat-producing ewes                                                                                                                                                     | 2014 | Trop Anim Hlth and Prod    | Blagitz         | 8  | Della Libera      | BRA |     | U Sao Paulo                              |                                          | Original | Field        | Aetiology    | Meat         |       |
| 404 | Risk factors, etiology and clinical aspects of mastitis in meat ewes of Parana, Brazil                                                                                                                                          | 2014 | Prev Vet Health            | Pereira         | 5  | Lidboa            | BRA |     | U Londrina                               |                                          | Original | Field        | Aetiology    | Risk factors | Meat  |
| 405 | Prevalence, pathogenic capability, virulence genes, biofilm formation, and antibiotic resistance of <i>Listeria</i> in goat and sheep milk confirms need of hygienic milking conditions                                         | 2014 | Pathogens Global Health    | Ozman           | 4  | Orabi             | EGY |     | U Cairo                                  |                                          | Original | Laboratory   | Aetiology    | Dairy        |       |
| 406 | Genetic parameters for somatic cell count, log <sub>10</sub> CC and somatic cell score of breeds: improved Valaichian, Trigai, Lacauze and their crosses                                                                        | 2014 | Acta Vet Beograd           | Makovicky       | 5  | Dlabekova         | SLV |     | U Komarno                                | U Faval Josef Satrik                     | Original | Field        | Risk factors | Diagnosis    | Dairy |
| 407 | Trematode infections in pregnant ewes can predispose to mastitis during the subsequent lactation period                                                                                                                         | 2014 | Res Vet Sci                | Mavrogiani      | 9  | Fthenakis         | GRE |     | U Thessaly                               |                                          | Original | Field        | Risk factors | Dairy        |       |
| 408 | Mastitis in small ruminants                                                                                                                                                                                                     | 2014 | Med Vet                    | Clechowicz      | 2  | Jaskowski         | POL |     | U Poznan                                 |                                          | Review   |              |              |              |       |
| 409 | Administration of antibiotics to ewes at the beginning of the dry-period                                                                                                                                                        | 2014 | J Dairy Res                | Petridis        | 2  | Fthenakis         | GRE |     | U Thessaly                               |                                          | Review   |              |              |              |       |
| 410 | Thermographic variation of the udder of dairy ewes in early lactation and following an <i>Escherichia coli</i> endotoxin intramammary challenge in late lactation                                                               | 2014 | J Dairy Sci                | Castro-Costa    | 6  | Agulto            | ESP |     | U Barcelona                              |                                          | Original | Field        | Diagnosis    | Dairy        |       |
| 411 | Diagnosis of clinical or subclinical mastitis in ewes                                                                                                                                                                           | 2014 | Small Rumin Res            | Fraglou         | 3  | Fthenakis         | GRE |     | U Thessaly                               | Agricultural Organisation Dimitra Greece | Review   |              |              |              |       |
| 412 | The quality of Valle del Belice sheep's milk and cheese produced in the hot summer season in Sicily                                                                                                                             | 2014 | Dairy Sci Technol          | Todaro          | 3  | Scatassa          | ITL |     | U Palermo                                | Inst Zooprofilattico Sicilia             | Original | Field        | Effects      | Dairy        |       |
| 413 | Study on Correlation of Maedi-Visna Virus (MVV) with Ovine Subclinical Mastitis in Iran                                                                                                                                         | 2014 | Int J Microbiol            | Asadpour        | 4  | Jafari            | IRN |     | U Tabriz                                 |                                          | Original | Field        | Risk factors | Dairy        |       |
| 414 | Ewe characteristics associated with neonatal loss in Norwegian sheep                                                                                                                                                            | 2014 | Prev Vet Med               | Holmoy          | 3  | Grohn             | NOR | USA | U Life Science Norway                    |                                          | Original | Field        | Effects      | Meat         |       |
| 415 | Associations of pre-lambing body condition score and serum beta-hydroxybutyric acid and non-esterified fatty acids concentrations with periparturient health of Chios dairy ewes                                                | 2014 | Small Rumin Res            | Katragiannis    | 8  | Brossos           | GRE |     | Aristotle Thessaloniki                   |                                          | Original | Field        | Risk factors | Dairy        |       |
| 416 | Ultrasonographic findings in the ovine udder during involution                                                                                                                                                                  | 2014 | J Dairy Res                | Petridis        | 7  | Fthenakis         | GRE |     | U Thessaly                               |                                          | Original | Experimental | Pathogenesis | Dairy        |       |
| 417 | Identifying the major bacteria causing intramammary infections in individual milk samples of sheep and goats using traditional bacteria culturing and real-time polymerase chain reaction                                       | 2014 | J Dairy Sci                | Rovai           | 7  | Leitner           | ISR | ESP | Kimron Veterinary Institute              | U Barcelona                              | Original | Laboratory   | Aetiology    | Dairy        |       |
| 418 | Comparison of bacteriological culture and PCR for detection of bacteria in ovine milk. Sheep are not small cows                                                                                                                 | 2014 | J Dairy Sci                | Zadoks          | 7  | Bullingall        | GBR |     | Merdon Research Institute                | U Glasgow                                | Original | Laboratory   | Aetiology    | Meat         |       |
| 419 | <i>Staphylococcus aureus</i> from 152 cases of bovine, ovine and caprine mastitis investigated by Multiple-locus variable number of tandem repeat analysis (MLVA)                                                               | 2014 | Vet Res                    | Bergonier       | 10 | Vergrand          | FRA |     | U Toulouse                               | INRA                                     | Original | Laboratory   | Aetiology    | Dairy        |       |
| 420 | Sequence diversity, cytotoxicity and antigenic similarities of the leukotoxin of isolates of <i>Mannheimia</i> species from mastitis in domestic sheep                                                                          | 2014 | Vet Microbiol              | Onaleki         | 6  | Markham           | AUS |     | U Melbourne                              |                                          | Original | Laboratory   | Aetiology    | Meat         |       |
| 421 | Yields in the raw ewe's milk                                                                                                                                                                                                    | 2014 | Acta Scient Vet            | Spannberg       | 8  | Suntarfo          | BRA |     | U Rio Grande do Sul                      | U Santa Maria                            | Original | Field        | Aetiology    | Dairy        |       |
| 422 | Effects of lactation stage, lactation order and udder types on udder traits and composition of milk in Tui ewes                                                                                                                 | 2015 | Ank Univers Vet Fakül Derg | Sari            | 3  | Özk               | TUR |     | U Kafkas                                 |                                          | Original | Field        | Risk factors | Dairy        |       |
| 423 | Sheep milk: physical-chemical characteristics and microbiological quality                                                                                                                                                       | 2015 | Arq Latinoam Nutr          | Merlin          | 7  | de Santana        | BRA |     | U North Parana                           |                                          | Original | Laboratory   | Effects      | Dairy        |       |
| 424 | Divergence of a strain of <i>Pseudomonas aeruginosa</i> during an outbreak of ovine mastitis                                                                                                                                    | 2015 | Vet Microbiol              | Wright          | 11 | Wintanley         | GBR |     | U Liverpool                              |                                          | Original | Laboratory   | Aetiology    | Meat         |       |
| 425 | Effects of intramammary antibiotic therapy during the dry period on the performance of Lacauze dairy sheep under intensive management                                                                                           | 2015 | J Dairy Res                | Hernandez       | 7  | Astiz             | ESP |     | INIA                                     | Graña Cerromonte                         | Original | Field        | Control      | Dairy        |       |
| 426 | Interactions between parasitic infections and reproductive efficiency in sheep                                                                                                                                                  | 2015 | Vet Parasitol              | Fthenakis       | 4  | Papadopoulos      | GRE |     | U Thessaly                               | Aristotle U Thessaloniki                 | Review   |              |              |              |       |
| 427 | Effects of intramammary infection on whey proteotograms of sheep during lactation                                                                                                                                               | 2015 | Prev Vet Health            | Lemos           | 7  | de Mendonca       | BRA |     | U Pernambuco                             |                                          | Original | Field        | Effects      | Dairy        |       |
| 428 | Host-specificity of <i>Staphylococcus aureus</i> causing intramammary infections in dairy animals assessed by genotyping and virulence genes                                                                                    | 2015 | Vet Microbiol              | Bar-Gal         | 6  | Leitner           | ISR |     | Kimron Veterinary Institute              | Hebrew U Jerusalem                       | Original | Laboratory   | Aetiology    | Dairy        |       |
| 429 | Prevalence, genetic diversity, and antimicrobial susceptibility profiles of <i>Staphylococcus aureus</i> isolated from bulk tank milk from Greek traditional ovine farms                                                        | 2015 | Small Rumin Res            | Zdragou         | 10 | Laika             | GRE |     | Agricultural Organisation Dimitra Greece | TEI Thessaloniki                         | Original | Laboratory   | Aetiology    | Dairy        |       |
| 430 | Effect of subclinical intramammary infection on milk quality in dairy sheep: 1. Fresh-soft cheese produced from milk of uninfected and infected glands and from their blends                                                    | 2015 | Small Rumin Res            | Rovai           | 5  | Leitner           | ISR |     | Kimron Veterinary Institute              | U Barcelona                              | Original | Field        | Effects      | Dairy        |       |
| 431 | Relationship of somatic cell count and composition and coagulation properties of ewe's milk                                                                                                                                     | 2015 | Mljikarstvo                | Villalobos      | 7  | da Cunha          | ESP |     | U Cordoba                                |                                          | Original | Field        | Effects      | Dairy        |       |
| 432 | Clonal profile, virulence and resistance of <i>Staphylococcus aureus</i> isolated from sheep milk                                                                                                                               | 2015 | Braz J Microbiol           | Martins         | 9  | da Cunha          | BRA |     | U Paulista                               |                                          | Original | Laboratory   | Aetiology    | Dairy        |       |
| 433 | Effect of subclinical intramammary infection on milk quality in dairy sheep: II. Matured-pressed cheese (Manchego) produced from milk of uninfected and infected glands and from their blends                                   | 2015 | Small Rumin Res            | Rovai           | 10 | Leitner           | ISR | ESP | Kimron Veterinary Institute              | U Barcelona                              | Original | Field        | Effects      | Dairy        |       |
| 434 | Genetic selection for reduced somatic cell counts in sheep milk: a review                                                                                                                                                       | 2015 | Small Rumin Res            | Riggio          | 2  | Portolano         | NRD | ITL | U Wageningen                             | U Palermo                                | Review   |              |              |              |       |
| 435 | Complete genome sequence of <i>Corynebacterium jeikeium</i> DSM 44610, isolated from the milk of a Manchego sheep with subclinical mastitis                                                                                     | 2015 | Microbiol Resour Announc   | Ruckert         | 4  | Tauch             | GER | USA | U Hohenheim                              | Massachusetts Institute of Technology    | Original | Laboratory   | Aetiology    | Dairy        |       |
| 436 | Effect of automatic cluster removes on milking efficiency and udder condition of Manchego ewes                                                                                                                                  | 2015 | J Dairy Sci                | Buaso-Rodenas   | 5  | Diaz              | ESP |     | U Miguel Hernandez                       |                                          | Original | Laboratory   | Risk factors | Dairy        |       |
| 437 | Neutrophil extracellular traps in sheep mastitis                                                                                                                                                                                | 2015 | Vet Res                    | Pisani          | 9  | Addis             | ITL |     | Ponto Comic Reseach                      |                                          | Original | Laboratory   | Pathogenesis | Dairy        |       |
| 438 | Prevalence and antimicrobial resistance of <i>Staphylococcus aureus</i> isolated from raw milk and dairy products                                                                                                               | 2015 | Food Control               | Jamali          | 5  | Dadrassia         | MAL |     | U Malaya                                 |                                          | Original | Laboratory   | Aetiology    | Treatment    | Dairy |
| 439 | Is udder ultrasonography a diagnostic tool for subclinical mastitis in sheep?                                                                                                                                                   | 2015 | Small Rumin Res            | Hussein         | 3  | Malik             | EGY |     | U Assiut                                 |                                          | Original | Field        | Diagnosis    | Dairy        |       |
| 440 | Composition, proteolysis indices and coagulating properties of ewe milk as affected by bulk tank somatic cell count                                                                                                             | 2015 | J Dairy Res                | Marti De Olivos | 5  | Molina            | ESP |     | U Miguel Hernandez                       | U Valencia                               | Original | Laboratory   | Effects      | Dairy        |       |
| 441 | Pregnancy toxemia as predisposing factor for development of mastitis in sheep during the immediately post-partum period                                                                                                         | 2015 | Small Rumin Res            | Barbagliani     | 10 | Fthenakis         | GRE |     | U Thessaly                               |                                          | Original | Experimental | Risk factors | Dairy        |       |
| 442 | Prevalence and etiology of subclinical mastitis in dairy ewes in two seasons in Semnan province                                                                                                                                 | 2015 | Trop Anim Hlth and Prod    | Sani            | 3  | Mozafari          | IRN |     | U Semnan                                 | U Tehran                                 | Original | Field        | Aetiology    | Epidemiology | Dairy |
| 443 | Bacterial species and their associations with acute and chronic mastitis in suckler ewes                                                                                                                                        | 2015 | J Dairy Sci                | Smith           | 6  | Green             | GBR |     | U Warwick                                |                                          | Original | Field        | Aetiology    | Meat         |       |
| 444 | The effect of health status of the udder on plasminogen activator activity of milk somatic cells in ovine milk                                                                                                                  | 2015 | Small Rumin Res            | Charismanidou   | 5  | Poliitis          | GRE |     | Agricultural U Athens                    |                                          | Original | Field        | Pathogenesis | Dairy        |       |
| 445 | A point mutation in suppressor of cytokine signalling 2 (SOCS2) increases the susceptibility to inflammation of the mammary gland while associated with higher body weight and size and higher milk production in a sheep model | 2015 | Flav Gen                   | Rupp            | 14 | Tosser-Klopp      | FRA |     | INRA                                     | U Toulouse                               | Original | Field        | Risk factors | Dairy        |       |
| 446 | The upper respiratory tract is a natural reservoir of haemolytic <i>Mannheimia</i> species associated with ovine mastitis                                                                                                       | 2015 | Vet Microbiol              | Onaleki         | 5  | Barber            | AUS |     | U Melbourne                              |                                          | Original | Field        | Aetiology    | Meat         |       |
| 447 | Mastitis in sheep: The last 10 years and the future of research                                                                                                                                                                 | 2015 | Vet Microbiol              | Gelasakis       | 5  | Fthenakis         | GRE |     | U Thessaly                               |                                          | Review   |              |              |              |       |
| 448 | Vaccination schedules in small ruminant farms                                                                                                                                                                                   | 2015 | Vet Microbiol              | Lacasta         | 6  | Fthenakis         | ESP | GRE | U Zaragoza                               | U Thessaly                               | Review   |              |              |              |       |
| 449 | Use of proteomics in the study of microbial diseases of small ruminants                                                                                                                                                         | 2015 | Vet Microbiol              | Katsafadou      | 4  | Fthenakis         | GRE |     | U Thessaly                               |                                          | Review   |              |              |              |       |
| 450 | Genetic resistance to infections in sheep                                                                                                                                                                                       | 2015 | Vet Microbiol              | Bishop          | 1  |                   | GBR |     | U Edinburgh                              |                                          | Review   |              |              |              |       |
| 451 | Evaluating coagulation properties of milk from dairy sheep with subclinical intramammary infection using near infrared light scatter: A preliminary study                                                                       | 2016 | J Food Eng                 | Abdeljawad      | 5  | Castillo          | ESP | EGY |                                          | U Fayoum                                 |          | Original     | Field        | Effects      | Dairy |
| 452 | Microbiological quality of raw milk in the Czech republic                                                                                                                                                                       | 2016 | Czech J Food Sci           | Bogdanovicova   | 6  | Karpiškova        | CZE |     | U Brno                                   | Inst Veterinary Research Czechia         | Original | Field        | Effects      | Dairy        |       |
| 453 | Physiological threshold of somatic cell count in milk of Polish health sheep and Polish lowland sheep                                                                                                                           | 2016 | Ann Anim Sci               | Swiderski       | 5  | Wierzbala         | POL |     | U Warsaw                                 | Academy of Sciences Poland               | Original | Field        | Diagnosis    | Meat         |       |
| 454 | New rapid method of DNA isolation from milk somatic cells                                                                                                                                                                       | 2016 | Anim Biotechnol            | Pukonska        | 5  | Malakisa          | POL |     | U Krakow                                 |                                          | Original | Laboratory   | Pathogenesis | Dairy        | Meat  |
| 455 | Response to dietary-induced energy restriction in dairy sheep divergently selected for resistance or susceptibility to mastitis                                                                                                 | 2016 | J Dairy Sci                | Bouvier-Muller  | 9  | Rupp              | FRA |     | INRA                                     | U Toulouse                               | Original | Field        | Risk factors | Dairy        |       |
| 456 | Relationships between somatic cell count and certain udder and test echo-morphometric measurements in mastitis caused by <i>Staphylococcus aureus</i> in Anadol sheep                                                           | 2016 | Rev Med Vet                | Ismail          | 3  | Al-Shayab         | JOD |     | Jordan U Science Technology              |                                          | Original | Field        | Risk factors | Dairy        |       |
| 457 | Development and test of a portable device to monitor the health status of Sarda breed sheep by the measurement of the milk electrical conductivity                                                                              | 2016 | Ital J Anim Sci            | Caria           | 5  | Tozzona           | ITL |     | U Sassari                                |                                          | Original | Field        | Diagnosis    | Dairy        |       |
| 458 | Seasonal dynamics and possible development of total count of microorganisms in sheep's milk                                                                                                                                     | 2016 | Acta Vet Brno              | Klansova        | 10 | Vondruskova       | CZE |     | Inst Dairy Research Czechia              |                                          | Original | Field        | Effects      | Dairy        |       |
| 459 | Relationship of litter size with milk yield, udder morphology and udder health of East Friesian sheep                                                                                                                           | 2016 | J Central Europ Agric      | Pijic           | 4  | Mioc              | CRO |     | U Zagreb                                 |                                          | Original | Field        | Risk factors | Dairy        |       |
| 460 | Comparative study on stress traits and reproductive efficiency in Turcana and Trigai ewes                                                                                                                                       | 2016 | Scient Papers D            | Gavojdan        | 4  | Kusza             | ROM |     | Inst Res and Dev Sheep & Goats           |                                          | Original | Field        | Risk factors | Dairy        |       |
| 461 | Prevalence and molecular characterization of staphylococci isolated from sheep with subclinical mastitis in West-Azerbaijan province, Iran                                                                                      | 2016 | Vet Res Forum              | Rahman          | 4  | Ardebili          | IRN |     | U Urmia                                  |                                          | Original | Field        | Aetiology    | Dairy        |       |
| 462 | A cross-sectional study of 329 farms in England to identify risk factors for ovine clinical mastitis                                                                                                                            | 2016 | Prev Vet Med               | Cooper          | 5  | Green             | GBR |     | U Warwick                                |                                          | Original | Field        | Risk factors | Meat         |       |
| 463 | Development of a facial expression scale using forehead and mastitis as models of pain in sheep                                                                                                                                 | 2016 | Appl Anim Behav Sci        | McLennan        | 6  | Constantino-Casas | GBR |     | U Cambridge                              |                                          | Original | Field        | Effects      | Meat         |       |
| 464 | Clinical evaluation of the use of enrofloxacin against <i>Staphylococcus aureus</i> clinical mastitis in sheep                                                                                                                  | 2016 | Small Rumin Res            | Ahili           | 6  | Culeri            | ITL |     | U Camerino                               |                                          | Original | Field        | Treatment    | Dairy        |       |
| 465 | Association study between beta-defensin gene polymorphisms and mastitis resistance in Valle del Belice dairy sheep breed                                                                                                        | 2016 | Small Rumin Res            | Tokoue          | 7  | Portolano         | ITL |     | U Palermo                                |                                          | Original | Field        | Risk factors | Dairy        |       |
| 466 | <i>Staphylococcus aureus</i> isolates from goat and sheep milk seem to be closely related and differ from isolates detected from bovine milk                                                                                    | 2016 | Front Microbiol            | Merz            | 3  | Jöhler            | SWI |     | U Zurich                                 |                                          | Original | Laboratory   | Aetiology    | Dairy        |       |



|     |                                                                                                                                                                                                                                        |      |                                |                   |    |                 |      |                                           |                                           |                                          |              |              |              |       |       |
|-----|----------------------------------------------------------------------------------------------------------------------------------------------------------------------------------------------------------------------------------------|------|--------------------------------|-------------------|----|-----------------|------|-------------------------------------------|-------------------------------------------|------------------------------------------|--------------|--------------|--------------|-------|-------|
| 467 | Effect of farm characteristics and practices on hygienic quality of ovine raw milk used for artisan cheese production in central Italy                                                                                                 | 2016 | Anim Sci J                     | Carloni           | 7  | Tonacci         | ITL  | U Urbino                                  | Inst Zooprofilattico Umbria e Marche      | Original                                 | Field        | Effects      |              | Dairy |       |
| 468 | A longitudinal study of factors associated with acute and chronic mastitis and their impact on lamb growth rate in 10 suckler sheep flocks in Great Britain                                                                            | 2016 | Prev Vet Med                   | Grant             | 3  | Green           | GBR  | U Warwick                                 |                                           | Original                                 | Field        | Risk factors | Effects      | Meat  |       |
| 469 | Diagnosis of subclinical mastitis in Santa Ines and Morada Nova sheep in southeastern Brazil                                                                                                                                           | 2016 | Trop Anim Hlth and Prod        | Zafalon           | 4  | Fim             | BRA  | U Sao Paulo                               | Agricultural Research Organisation Brazil | Original                                 | Field        | Diagnosis    |              | Dairy |       |
| 470 | Somatic cell counts, chemical composition and coagulation properties of goat and sheep bulk tank milk                                                                                                                                  | 2016 | Int Dairy J                    | Leitner           | 5  | Merin           | ISR  | Kimron Veterinary Institute               | Afmmk Israel                              | Original                                 | Field        | Effects      |              | Dairy |       |
| 471 | Assessment of genetic variation for pathogen-specific mastitis resistance in Valle del Belice dairy sheep                                                                                                                              | 2016 | BMC Vet Res                    | Tolone            | 6  | Pertolano       | ITL  | U Palermo                                 |                                           | Original                                 | Field        | Risk factors |              | Dairy |       |
| 472 | Characterization of Staphylococcus aureus isolates from raw milk sources in Victoria, Australia                                                                                                                                        | 2016 | BMC Microbiol                  | McMillan          | 5  | Fox             | AUS  | CSIRO                                     |                                           | Original                                 | Field        | Effects      |              | Dairy |       |
| 473 | Evaluation of milk cathelicidin for detection of dairy sheep mastitis                                                                                                                                                                  | 2016 | J Dairy Sci                    | Addis             | 10 | Uzzau           | ITL  | Punto Conte Research                      | U Sassari                                 | Original                                 | Field        | Diagnosis    |              | Dairy |       |
| 474 | Survey on small ruminant bacterial mastitis in Italy, 2013-2014                                                                                                                                                                        | 2016 | Small Rumin Res                | Done              | 13 | Canau           | ITL  | Inst Zooprofilattico Sardegna             |                                           | Original                                 | Field        | Aetiology    |              | Dairy |       |
| 475 | Molecular epidemiology of an outbreak of clinical mastitis in sheep caused by Mannheimia haemolytica                                                                                                                                   | 2016 | Vet Microbiol                  | Omakdi            | 5  | Barber          | AUS  | U Melbourne                               | Ministry of Agriculture Australia         | Original                                 | Laboratory   | Aetiology    | Epidemiology | Meat  |       |
| 476 | Use of nanoparticulated antimicrobials to treat subclinical mastitis of ewes during the dry period                                                                                                                                     | 2016 | Prev Vet Med                   | Santana           | 8  | Mosquetra       | BRA  | Agricultural Research Organisation Brazil | U Ouro Preto                              | Original                                 | Field        | Control      |              | Dairy |       |
| 477 | Predisposing factors and control of bacterial mastitis in dairy ewes                                                                                                                                                                   | 2016 | J Hill Vet Med Soc             | Bramis            | 5  | Aranos          | GRE  | Aristotle U Thessaloniki                  |                                           | Review                                   |              |              |              | Dairy |       |
| 478 | Influence of lactation stages and rain periods on subclinical mastitis in meat producing ewes                                                                                                                                          | 2016 | Cenc Rural                     | Zafalon           | 6  | Santana         | BRA  | Agricultural Research Organisation Brazil |                                           | Original                                 | Field        | Risk factors |              | Meat  |       |
| 479 | Characterization of resistance to tetracyclines and aminoglycosides of sheep mastitis pathogens: study of the effect of gene content on resistance                                                                                     | 2016 | J Appl Microbiol               | Lollai            | 4  | Piras           | ITL  | Inst Zooprofilattico Sardegna             | Mastitis Reference Centre Italy           | Original                                 | Laboratory   | Treatment    |              | Dairy |       |
| 480 | Effect of management factors on reproductive and milk production performance of a dairy sheep breed adapted to low-input management systems                                                                                            | 2017 | J Hill Vet Med Soc             | Tranidakis        | 6  | Kiosis          | GRE  | Aristotle U Thessaloniki                  | Agricultural Organisation Dimitra Greece  | Original                                 | Field        | Risk factors |              | Dairy |       |
| 481 | Correlation between total bacterial and somatic cell counts in bulk tank ewes' milk                                                                                                                                                    | 2017 | J Food Nutr Res                | Klimosova         | 9  | Vondrakova      | SLK  | Inst Dairy Research Czechia               |                                           | Original                                 | Field        | Diagnosis    |              | Dairy |       |
| 482 | Comparison of biofilm formation by Staphylococcus aureus and Staphylococcus epidermidis strains isolated from sheep milk using three diagnostic methods                                                                                | 2017 | Int J Vet Sci                  | Vautl             | 5  | Zigo            | SLK  | U Kosice                                  |                                           | Original                                 | Laboratory   | Aetiology    |              | Dairy |       |
| 483 | Relationship of mammary gland health status and other nutrition factors with electrical conductivity of milk in Manchego ewes                                                                                                          | 2017 | J Dairy Sci                    | Romero            | 5  | Diaz            | ESP  | U Miguel Hernandez                        |                                           | Original                                 | Field        | Diagnosis    |              | Dairy |       |
| 484 | Characteristics of resistance and virulence factors in different species of coagulase-negative staphylococci isolated from milk of healthy sheep and animals with subclinical mastitis                                                 | 2017 | J Dairy Sci                    | Martins           | 8  | Curba           | BRA  | U Paulista                                |                                           | Original                                 | Laboratory   | Aetiology    |              | Dairy |       |
| 485 | Occurrence of mastitis and associated pathogens with antiogram in animal population of Peshawar, Pakistan                                                                                                                              | 2017 | Thaj J Vet Med                 | Rafullah          | 8  | Khan            | PAK  | Veterinary Research Inst Pakistan         |                                           | Original                                 | Field        | Aetiology    | Treatment    | Dairy |       |
| 486 | Serum concentrations of acute phase proteins in goats and ewes with naturally acquired Staphylococcus aureus mastitis                                                                                                                  | 2017 | Arq Bras Med Vet Zoot          | Simplicio         | 6  | Fagliari        | BRA  | U Paulista                                |                                           | Original                                 | Field        | Pathogenesis |              | Dairy |       |
| 487 | Bacteriological quality and occurrence of some microbial pathogens in goat's and ewe's milk in Egypt                                                                                                                                   | 2017 | Int Food Res J                 | Omharak           | 2  | Elbagy          | EGY  | U Sadat City                              |                                           | Original                                 | Field        | Aetiology    |              | Dairy |       |
| 488 | Susceptibility and PK/PD relationships of Staphylococcus aureus strains from ovine and caprine with clinical mastitis against five veterinary fluoroquinolones                                                                         | 2017 | Vet Rec                        | Serrano-Rodriguez | 6  | Fernandez-Vazou | ESP  | U Cordoba                                 | U Murcia                                  | Original                                 | Laboratory   | Treatment    |              | Dairy |       |
| 489 | B-Mode ultrasonography of mammary glands in dairy ewes during the lactation period                                                                                                                                                     | 2017 | Revis Cientif                  | Makovicky         | 3  | Margetin        | SLK  | U J Seby                                  | Agricultural U Slovakia                   | Inst Research Animal Production Slovakia | Original     | Field        | Diagnosis    |       | Dairy |
| 490 | Antimicrobial susceptibility and genotyping of Staphylococcus aureus isolates collected between 1986 and 2015 from ovine mastitis                                                                                                      | 2017 | Vet Microbiol                  | Azara             | 4  | Toia            | ITL  | Inst Zooprofilattico Sardegna             |                                           | Original                                 | Laboratory   | Aetiology    | Treatment    | Dairy |       |
| 491 | Ultrasonographic examination of the udder in sheep                                                                                                                                                                                     | 2017 | Small Rumin Res                | Barbagliani       | 5  | Petridis        | GRE  | U Thessaly                                |                                           | Review                                   |              |              |              | Dairy |       |
| 492 | Cathelicidin production and release by mammary epithelial cells during infectious mastitis                                                                                                                                             | 2017 | Vet Immunol Immunopathol       | Cubeddu           | 11 | Addis           | ITL  | Punto Conte Research                      | U Sassari                                 | U Milan                                  | Original     | Field        | Pathogenesis |       | Dairy |
| 493 | Effects of intramammary infusion of sage (Salvia officinalis) essential oil on milk somatic cell count, milk composition parameters and selected hematology and serum biochemical parameters in Awassi sheep with subclinical mastitis | 2017 | Vet World                      | Alakish           | 5  | Qasrta          | JOD  | Jordan U Science Technology               |                                           | Original                                 | Field        | Control      |              | Dairy |       |
| 494 | Prevalence and aetiology of sheep mastitis in Alentejo region of Portugal                                                                                                                                                              | 2017 | Small Rumin Res                | Qasrta            | 1  | PORE            | GRE  | U Evros                                   |                                           | Original                                 | Field        | Aetiology    | Epidemiology | Dairy |       |
| 495 | Biofilm formation and virulence factor analysis of Staphylococcus aureus isolates collected from ovine mastitis                                                                                                                        | 2017 | J Appl Microbiol               | Azara             | 4  | Toia            | ITL  | Inst Zooprofilattico Sardegna             |                                           | Original                                 | Laboratory   | Pathogenesis |              | Dairy |       |
| 496 | The genomic architecture of mastitis resistance in dairy sheep                                                                                                                                                                         | 2017 | BMC Genomics                   | Banos             | 10 | Paldit          | GBR  | U Edinburgh                               | Aristotle U Thessaloniki                  | U London                                 | Original     | Field        | Risk factors |       | Dairy |
| 497 | Somatic cell counts in raw ewe's milk in dairy practices: frequency of distribution and possible effect on milk yield and composition                                                                                                  | 2017 | Mjpkarstvo                     | Tacin             | 6  | cravova         | SLK  | Agricultural U Slovakia                   | Inst Research Animal Production Slovakia  | Original                                 | Field        | Diagnosis    | Effects      | Dairy |       |
| 498 | Prevalence and characterization of methicillin-resistant Staphylococcus aureus carrying mecA or mecC and methicillin-susceptible Staphylococcus aureus in dairy sheep farms in central Italy                                           | 2017 | J Dairy Sci                    | Giucinti          | 13 | Battisti        | ITL  | Inst Zooprofilattico Lazio e Toscana      |                                           | Original                                 | Laboratory   | Treatment    |              | Dairy |       |
| 499 | Gastrointestinal trichostromylosis can predispose ewes to clinical mastitis after experimental mammary infection                                                                                                                       | 2017 | Vet Parasitol                  | Mavrogianis       | 8  | Fthenakis       | GRE  | U Thessaly                                |                                           | Original                                 | Experimental |              |              | Dairy |       |
| 500 | Intramammary infections and somatic cell counts in meat and pelt producing ewes with clinically healthy udders                                                                                                                         | 2017 | Small Rumin Res                | Persson           | 5  | Walker          | SWE  | National Veterinary Institute Sweden      | U Uppsala                                 | Vaxa Sweden                              | Original     | Field        | Effects      |       | Meat  |
| 501 | Microbial agents in macroscopically healthy mammary gland tissues of small ruminants                                                                                                                                                   | 2017 | Peer J                         | Spurria           | 15 | Cappucco        | ITL  | U Turin                                   |                                           | Original                                 | Field        | Aetiology    |              | Dairy |       |
| 502 | Intramammary infusion of a live culture of Lactococcus lactis in ewes to treat Staphylococcal mastitis                                                                                                                                 | 2017 | J Med Microbiol                | Mignacca          | 14 | Marianelli      | ITL  | Inst Zooprofilattico Sicilia              | Institute of Health Italy                 | Original                                 | Field        | Treatment    |              | Dairy |       |
| 503 | Differential microbiological quality of sheep milk from bulk tank                                                                                                                                                                      | 2018 | Rev Sci                        | Jimenez-Sobrinio  | 5  | Artaas-Sanchez  | ESP  | INDIA                                     |                                           | Original                                 | Field        | Effects      |              | Dairy |       |
| 504 | The relationship between somatic cells and milk traits, and their variation in dairy sheep breeds in Slovakia                                                                                                                          | 2018 | J Anim Feed Sci                | Oravcova          | 3  | Tancin          | SLK  | Agricultural U Slovakia                   | Inst Research Animal Production Slovakia  | Original                                 | Field        | Risk factors |              | Dairy |       |
| 505 | Somatic cell count in the diagnosis of subclinical mastitis in sheep of different breeds                                                                                                                                               | 2018 | Semina Cim Agrar               | Zafalon           | 4  | Fim             | BRA  | U Paulista                                | Agricultural Research Organisation Brazil | Original                                 | Field        | Diagnosis    |              | Dairy |       |
| 506 | Antimicrobial activity of essential oils of lamiaceae aromatic species towards sheep mastitis-causing Staphylococcus aureus and Staphylococcus epidermidis                                                                             | 2018 | J Essential Oil Bearing Plants | Qasrta            | 5  | Martins         | PORE | U Evros                                   |                                           | Original                                 | Field        | Control      |              | Dairy |       |
| 507 | Antibacterial effect of Czech and Manuka honey on selected mastitis pathogens                                                                                                                                                          | 2018 | Acta Vet Brno                  | Klimosova         | 3  | Nejsachlebova   | CZE  | Inst Dairy Research Czechia               |                                           | Original                                 | Field        | Treatment    |              | Dairy |       |
| 508 | The effects on contagious mastitis pathogens in bulk tank on physicochemical properties of Iranian white cheese                                                                                                                        | 2018 | Karpatian J Food Sci Technol   | Ghoisari          | 5  | Roozbahani      | IRN  | U Shiraz                                  |                                           | Original                                 | Field        | Effects      |              | Dairy |       |
| 509 | Bacteriological cure rate and changes in milk composition in mastitis vaccinated ewes affected with subclinical mastitis                                                                                                               | 2018 | Vet World                      | Alakish           | 6  | Olymat          | JOD  | Jordan U Science Technology               |                                           | Original                                 | Field        | Control      |              | Dairy |       |
| 510 | Risk factors of teat-end hyperkeratosis and its association with udder health in dairy ewes                                                                                                                                            | 2018 | J Dairy Res                    | Vouraki           | 4  | Aranos          | GRE  | Aristotle U Thessaloniki                  |                                           | Original                                 | Field        | Risk factors |              | Dairy |       |
| 511 | Use of contrast-enhanced ultrasonographic examination to evaluate health status of mammary glands of ewes at the end of a lactation period                                                                                             | 2018 | J Dairy Res                    | Mantziras         | 8  | Barbagliani     | GRE  | U Thessaly                                | Air Force Greece                          | Original                                 | Field        | Diagnosis    |              | Dairy |       |
| 512 | First description in Greece of mprC-positive staphylococci causing subclinical mastitis in ewes                                                                                                                                        | 2018 | Microbial Drug Res             | Papagiannidis     | 8  | Petnaki         | GRE  | U Thessaly                                | CZE                                       | Original                                 | Laboratory   | Treatment    |              | Dairy |       |
| 513 | Somatic cell count-based selection reduces susceptibility to energy shortage during early lactation in a sheep model                                                                                                                   | 2018 | J Dairy Sci                    | Bouvier-Muller    | 7  | Rupp            | FRA  | U Toulouse                                | INRA                                      | Original                                 | Field        | Risk factors |              | Dairy |       |
| 514 | Isolation and identification of bacteria causing mastitis in small ruminants and their susceptibility to antibiotics, honey, essential oils, and plant extracts                                                                        | 2018 | Vet World                      | Abdalthamed       | 3  | Abou Zeina      | EGY  | Nation Research Institute Egypt           |                                           | Original                                 | Laboratory   | Treatment    |              | Dairy |       |
| 515 | Relationship between virulence factor genes in coagulase-negative Staphylococcus spp. and failure of antimicrobial treatment of subclinical mastitis in sheep                                                                          | 2018 | Prev Vet Med                   | Zafalon           | 8  | Pilon           | BRA  | U Paulista                                | Agricultural Research Organisation Brazil | Original                                 | Laboratory   | Treatment    |              | Dairy |       |
| 516 | Phenotypic and genetic relationships between indicators of the mammary gland health status and milk composition, coagulation, and curd firming in dairy sheep                                                                          | 2018 | J Dairy Sci                    | Pazola            | 6  | Vacca           | ITL  | U Sassari                                 |                                           | Original                                 | Field        | Risk factors |              | Dairy |       |
| 517 | Determination of milk production losses and variations of fat and protein percentages according to different levels of somatic cell count in Valle del Belice dairy sheep                                                              | 2018 | Small Rumin Res                | Sutera            | 6  | Tolone          | ITL  | U Palermo                                 |                                           | Original                                 | Field        | Effects      |              | Dairy |       |
| 518 | Antibiotic-resistant, enterotoxin gene profiles and farm-level prevalence of Staphylococcus aureus in cow, sheep and goat bulk tank milk in Jordan                                                                                     | 2018 | Int Dairy J                    | Obaidat           | 4  | Al-Hakimi       | JOD  | Jordan U Science Technology               |                                           | Original                                 | Laboratory   | Treatment    |              | Dairy |       |
| 519 | The mammary microenvironment in mastitis in humans, dairy ruminants, rabbits and rodents: a one health focus                                                                                                                           | 2018 | J Mammary Gland Biol Neopl     | Haeghs            | 2  | Watson          | GBR  | U Cambridge                               |                                           | Review                                   |              |              |              | Dairy |       |
| 520 | Association between polymorphism of ABCG2 gene and somatic cell count in Czech dairy sheep breeds                                                                                                                                      | 2018 | Med Vet                        | Hofmannova        | 6  | Stivalova       | CZE  | Inst Animal Science Czechia               |                                           | Original                                 | Field        | Risk factors |              | Dairy |       |
| 521 | Extensive countrywide field investigation of subclinical mastitis in sheep in Greece                                                                                                                                                   | 2018 | J Dairy Sci                    | Vasilicou         | 13 | Fthenakis       | GRE  | U Thessaly                                |                                           | Original                                 | Field        | Aetiology    | Epidemiology | Dairy |       |
| 522 | Association of subclinical mastitis prevalence with sheep breeds in Greece                                                                                                                                                             | 2018 | J Dairy Res                    | Vasilicou         | 8  | Fthenakis       | GRE  | U Thessaly                                |                                           | Original                                 | Field        | Risk factors |              | Dairy |       |
| 523 | Reference values for serum amyloid A, haptoglobin, lysozyme, zinc and iron in healthy lactating Lacune sheep                                                                                                                           | 2018 | Acta Vet Scand                 | Mysliore          | 6  | Felici          | ITL  | U Perugia                                 | Inst Zooprofilattico Umbria e Marche      | Original                                 | Laboratory   | Pathogenesis |              | Dairy |       |
| 524 | Diagnostic evaluation of milk lactate dehydrogenase and alkaline phosphatase activities by receiver operating characteristic analysis curve in early lactation of ewes with subclinical mastitis                                       | 2018 | Vet Res Forum                  | Sani              | 4  | Kalshouzan      | IRN  | U Semnan                                  |                                           | Original                                 | Laboratory   | Diagnosis    |              | Dairy |       |
| 525 | Factors affecting ewe somatic cell count and its relationship with lamb weaning weight in extensively managed flocks                                                                                                                   | 2018 | Translatinal Anim Sci          | Murthy            | 3  | Taylor          | USA  | U Montana State                           | Ministry of Agriculture USA               | Original                                 | Field        | Risk factors | Effects      | Meat  |       |
| 526 | Local and systemic humoral response to ovine mastitis caused by Staphylococcus epidermidis                                                                                                                                             | 2018 | Sage Open Med                  | Qasrta            | 1  | PORE            | GRE  | U Evros                                   |                                           | Original                                 | Laboratory   | Pathogenesis |              | Dairy |       |
| 527 | Detection of quantitative trait loci and putative causal variants affecting somatic cell count in dairy sheep by using a 50K SNP chip and whole-genome sequencing                                                                      | 2018 | J Dairy Sci                    | Gutierrez-Gil     | 4  | Araiza          | ESP  | U Leon                                    |                                           | Original                                 | Laboratory   | Risk factors |              | Dairy |       |
| 528 | Udder types and associated traits affect milk composition and subclinical mastitis in Karayaka sheep                                                                                                                                   | 2018 | Int J Anim Sci                 | Akdag             | 6  | Demir           | TUR  | U Ondokuz Mayis                           | U Cerrahpasa                              | Original                                 | Field        | Risk factors |              | Dairy |       |
| 529 | Antimicrobial resistance in mastitis, respiratory and enteric bacteria isolated from ruminant animals from the Atlantic Provinces of Canada from 1994-2013                                                                             | 2018 | Can Vet J                      | Awosile           | 4  | McClure         | CDN  | U Prince Edward Island                    |                                           | Original                                 | Laboratory   | Treatment    |              | Dairy |       |
| 530 | In vitro antibacterial effects of zinc oxide nanoparticles on multiple drug-resistant strains of Staphylococcus aureus and Escherichia coli: an alternative approach for antibacterial therapy of mastitis in sheep                    | 2018 | Vet World                      | Alakish           | 4  | Nawasrah        | JOD  | Jordan U Science Technology               |                                           | Original                                 | Field        | Treatment    |              | Dairy |       |
| 531 | Slime-producing staphylococci as causal agents of subclinical mastitis in sheep                                                                                                                                                        | 2018 | Vet Microbiol                  | Vasilicou         | 9  | Fthenakis       | GRE  | U Thessaly                                |                                           | Original                                 | Field        | Aetiology    | Epidemiology | Dairy |       |
| 532 | Lactoferrin and IgG levels in ovine milk throughout lactation: Correlation with milk quality parameters                                                                                                                                | 2018 | Small Rumin Res                | Navaro            | 7  | Sanchez         | ESP  | U Zaragoza                                | U Los Andes                               | Original                                 | Laboratory   | Diagnosis    |              | Dairy |       |
| 533 | Sheep mastitis Staphylococcus epidermidis biofilm effects on cell adhesion and inflammatory changes                                                                                                                                    | 2018 | Small Rumin Res                | Qasrta            | 3  | Larajo          | PORE | U Evros                                   |                                           | Original                                 | Laboratory   | Pathogenesis |              | Dairy |       |

|     |                                                                                                                                                                             |      |                                 |                   |    |              |     |                                 |                                          |          |              |              |              |         |       |
|-----|-----------------------------------------------------------------------------------------------------------------------------------------------------------------------------|------|---------------------------------|-------------------|----|--------------|-----|---------------------------------|------------------------------------------|----------|--------------|--------------|--------------|---------|-------|
| 534 | Milk cellularity and intramammary infections in primiparous and multiparous Lacune ewes during early lactation                                                              | 2018 | Small Rumin Res                 | Takano            | 12 | Blagitz      | BRA | U Sao Paulo                     |                                          | Original | Field        | Epidemiology | Diagnosis    | Dairy   |       |
| 535 | New mastitis phenotypes suitable for genomic selection in meat sheep and their genetic relationships with udder conformation and lamb live weights                          | 2018 | Animal                          | McLaren           | 6  | Conington    | GBR | Scotland's Rural College        |                                          | Original | Field        | Risk factors |              | Meat    |       |
| 536 | Mammary gland health of Santa Ines ewes at the drying and postpartum and evaluation of a dry-off therapy with gentamicin                                                    | 2018 | Prev Vet Biotech                | Pewira            | 8  | Muller       | BRA | U Londrina                      |                                          | Original | Field        | Control      |              | Dairy   |       |
| 537 | Use of geographical information system and ecological niche modelling for predicting potential space distribution of subclinical mastitis in ewes                           | 2019 | Vet Microbiol                   | Giamonopoulos     | 10 | Fibrenakis   | GRE | U Thessaly                      |                                          | Original | Field        | Epidemiology | Risk factors | Dairy   |       |
| 538 | Field evidence for association between increased gastrointestinal nematode burden and subclinical mastitis in dairy sheep                                                   | 2019 | Vet Parasitol                   | Koondalis         | 7  | Fibrenakis   | GRE | U Thessaly                      |                                          | Original | Field        | Risk factors |              | Dairy   |       |
| 539 | Associations between lamb growth to weaning and dam udder and teat scores                                                                                                   | 2019 | NZ Vet J                        | Griffiths         | 5  | Konyon       | NZL | U Massey                        |                                          | Original | Field        | Effects      |              | Meat    |       |
| 540 | Investigating associations between lamb survival to weaning and dam udder and teat scores                                                                                   | 2019 | NZ Vet J                        | Griffiths         | 5  | Konyon       | NZL | U Massey                        |                                          | Original | Field        | Effects      |              | Meat    |       |
| 541 | Milk electrical conductivity in Marchega ewes: variation throughout milking and relation with mammary gland health status                                                   | 2019 | Czech Anim Sci                  | Roca              | 5  | Diaz         | ESP | U Miguel Hernandez              |                                          | Original | Field        | Diagnosis    |              | Dairy   |       |
| 542 | Efficacy of a tripartite-4-ol based dipping for post-milking teat disinfection in the prevention of mastitis in dairy sheep                                                 | 2019 | J Esential Oil Res              | Done              | 7  | Canasas      | ITL | Mastitis Reference Centre Italy |                                          | Original | Field        | Control      |              | Dairy   |       |
| 543 | Study of potential environmental factors predisposing ewes to subclinical mastitis in Greece                                                                                | 2019 | Comp Immunol Microbiol Inf Dis  | Vasileiou         | 10 | Fibrenakis   | GRE | U Thessaly                      |                                          | Original | Field        | Risk factors |              | Dairy   |       |
| 544 | An approach for the estimation of somatic cell effect in Sarda sheep milk based on the analysis of milk traits and coagulation properties                                   | 2019 | Small Rumin Res                 | Paschito          | 4  | Pazzola      | ITL | U Sassari                       |                                          | Original | Field        | Effects      |              | Dairy   |       |
| 545 | Antimicrobial susceptibility pattern to disinfectants in Pseudomonas aeruginosa strains isolated from dairy sheep breeds in Sardinia                                        | 2019 | Large Anim Rev                  | Scano             | 12 | Liciardi     | ITL | U Cagliari                      | Inst Zooprofilattico Sardegna            |          | Original     | Laboratory   | Control      |         | Dairy |
| 546 | A validation study of loci associated with mastitis resistance in two French dairy sheep breeds                                                                             | 2019 | Gen Sel Evol                    | Oget              | 9  | Rupp         | FRA | U Toulouse                      |                                          | Original | Field        | Risk factors |              | Dairy   |       |
| 547 | Antimicrobial agent susceptibility and typing of staphylococcal isolates from subclinical mastitis in ewes                                                                  | 2019 | Microbiol Drug Res              | Vasileiou         | 8  | Fibrenakis   | GRE | U Thessaly                      |                                          | Original | Laboratory   | Treatment    |              | Dairy   |       |
| 548 | Biofilm production, quorum sensing system and analysis of virulence factors of Staphylococcus epidermidis collected from sheep milk samples                                 | 2019 | Small Rumin Res                 | Abbondio          | 5  | Toda         | ITL | Inst zooprofilattico Sardegna   |                                          | Original | Laboratory   | Pathogenesis |              | Dairy   |       |
| 549 | Differences between Staphylococcus aureus lineages isolated from ovine and caprine mastitis but not between isolates from clinical or subclinical mastitis                  | 2019 | J Dairy Sci                     | Hoskstra          | 6  | Koop         | NLD | U Utrecht                       |                                          | Original | Laboratory   | Aetiology    |              | Dairy   |       |
| 550 | Proteomic analysis of mammary glands provide insight into the immunity and metabolism pathways associated with clinical mastitis in meat sheep                              | 2019 | Animals                         | Gao               | 6  | Ma           | CHN | U Gansu                         | Labor Sheep Breeding Gansu China         |          | Original     | Laboratory   | Pathogenesis |         | Meat  |
| 551 | Antimicrobial resistance and distribution of Staphylococcus spp. pulsed types isolated from goat and sheep bulk tank milk in Southern Spain                                 | 2019 | Foodborne Pathog Dis            | Barrero-Dominguez | 7  | Astorga      | ESP | U Cordoba                       |                                          | Original | Laboratory   | Treatment    |              | Dairy   |       |
| 552 | Comparative evaluation of metallic skin staples or polypropylene sutures for primary closure of teat wounds in sheep                                                        | 2019 | NZ Vet J                        | Tsidi             | 9  | Galatos      | GRE | U Thessaly                      |                                          | Original | Experimental | Treatment    |              | Dairy   |       |
| 553 | Genetic and genomic studies in ovine mastitis                                                                                                                               | 2019 | Small Rumin Res                 | Oget              | 3  | Rupp         | FRA | INRA                            |                                          | Review   |              |              |              |         |       |
| 554 | Somatic cell counts in sheep milk                                                                                                                                           | 2019 | Small Rumin Res                 | Albenzio          | 6  | Santillo     | ITL | U Foggia                        |                                          | Review   |              |              |              |         |       |
| 555 | Milking routines and cluster detachment levels in small ruminants                                                                                                           | 2019 | Animal                          | Dzadic            | 5  | Mariet       | CRO | U Zagreb                        | Agrocampus Osijek                        |          | Review       |              |              |         |       |
| 556 | Digital gene expression analyses of mammary glands from meat ewes naturally infected with clinical mastitis                                                                 | 2019 | J Soc Open Sci                  | Li                | 4  | Ma           | CHN | U Gansu                         |                                          | Original | Laboratory   | Risk factors |              | Meat    |       |
| 557 | The relationship between lactoferrin gene polymorphism and subclinical mastitis in Awassi ewes                                                                              | 2019 | J Anim Plant Sci                | Alkhalid          | 4  | Alshabhat    | JOD | Jordan U Science Technology     |                                          | Original | Field        | Risk factors |              | Dairy   |       |
| 558 | Heritability of phenotypic udder traits to improve resilience to mastitis in Texel ewes                                                                                     | 2019 | Animal                          | Crump             | 5  | Green        | GBR | U Warwick                       |                                          | Original | Field        | Risk factors |              | Meat    |       |
| 559 | Role of staphylococci in mastitis in sheep                                                                                                                                  | 2019 | J Dairy Res                     | Vasileiou         | 8  | Fibrenakis   | GRE | U Thessaly                      |                                          | Review   |              |              |              |         |       |
| 560 | Proteomics data of ovine mastitis associated with Mannheimia haemolytica                                                                                                    | 2019 | D Brief                         | Katsafadou        | 9  | Fibrenakis   | GRE | U Thessaly                      | Academy Athens Greece                    |          | Original     | Field        | Pathogenesis |         | Dairy |
| 561 | Differential quantitative proteomics study of experimental Mannheimia haemolytica mastitis in sheep                                                                         | 2019 | J Proteom                       | Katsafadou        | 9  | Fibrenakis   | GRE | U Thessaly                      | Academy Athens Greece                    |          | Original     | Experimental | Pathogenesis |         | Dairy |
| 562 | Predisposing factors for bacterial mastitis in ewes                                                                                                                         | 2019 | Reprod Dom Anim                 | Vasileiou         | 4  | Fibrenakis   | GRE | U Thessaly                      |                                          | Review   |              |              |              |         |       |
| 563 | Use of proteomics in the study of mastitis in ewes                                                                                                                          | 2019 | Pathogens                       | Katsafadou        | 3  | Fibrenakis   | GRE | U Thessaly                      |                                          | Review   |              |              |              |         |       |
| 564 | Anti-staphylococcal biofilm antibodies in ewes and association with subclinical mastitis                                                                                    | 2019 | Small Rumin Res                 | Vasileiou         | 6  | Fibrenakis   | GRE | U Thessaly                      |                                          | Original | Laboratory   | Pathogenesis |              | Dairy   |       |
| 565 | Bulk tank somatic cell count and total bacterial count are affected by target practices and milking machine features in dairy sheep flocks in Castilla y Leon region, Spain | 2019 | Small Rumin Res                 | Gonzalo           | 4  | de la Fuente | ESP | U Leon                          |                                          | Original | Field        | Risk factors |              | Dairy   |       |
| 566 | Alternative methods improve the accuracy of genomic prediction using information from a causal point mutation in a dairy sheep model                                        | 2019 | BMC Genomics                    | Oget              | 5  | Rupp         | FRA | U Toulouse                      | INRA                                     |          | Original     | Field        | Risk factors |         | Dairy |
| 567 | Evaluation of efficacy of a biofilm-embedded bacteria-based vaccine against staphylococcal mastitis in sheep-A randomized, placebo-controlled field study                   | 2019 | J Dairy Sci                     | Vasileiou         | 15 | Fibrenakis   | GRE | U Thessaly                      |                                          | Original | Field        | Control      |              | Dairy   |       |
| 568 | Metatransomic and immunological analysis of milk from ewes with or without a history of mastitis                                                                            | 2019 | J Dairy Sci                     | Castro            | 8  | Rodriguez    | ESP | U Madrid                        |                                          | Original | Laboratory   | Risk factors | Pathogenesis |         | Dairy |
| 569 | Gelsolin expression in sheep milk somatic cells during lactation                                                                                                            | 2019 | Animal                          | Napolitano        | 8  | Marchitelli  | ITL | National Research Council Italy |                                          | Original | Laboratory   | Risk factors |              | Dairy   |       |
| 570 | Mammary defenses and immunity against mastitis in sheep                                                                                                                     | 2019 | Animals                         | Katsafadou        | 7  | Fragkou      | GRE | U Thessaly                      |                                          | Review   |              |              |              |         |       |
| 571 | Clinical and subclinical intramammary infection caused by coagulase negative staphylococci negatively affect milk yield and its quality in dairy sheep                      | 2019 | Small Rumin Res                 | Leitner           | 3  | Merin        | ISR | Kimron Veterinary Institute     | Agri Research Organisation Israel        |          | Review       |              |              |         |       |
| 572 | Interactions between parasitism and milk production - mastitis in sheep                                                                                                     | 2019 | Small Rumin Res                 | Vasileiou         | 7  | Papadopoulos | GRE | U Thessaly                      | Arisekio U Thessaloniki                  |          | Review       |              |              |         |       |
| 573 | Comparison of PCR-RFLP, API (R) 20 Strip and MALDI-TOF MS for identification of Streptococcus spp. collected from sheep and goat milk samples                               | 2019 | Small Rumin Res                 | Rosa              | 4  | Toda         | ITL | Inst zooprofilattico Sardegna   |                                          | Original | Laboratory   | Aetiology    |              | Dairy   |       |
| 574 | Udder surgery in ewes                                                                                                                                                       | 2019 | Small Rumin Res                 | Tsidi             | 2  | Fibrenakis   | GRE | U Thessaly                      |                                          | Review   |              |              |              |         |       |
| 575 | Mammary involution and relevant udder health management in sheep                                                                                                            | 2019 | Small Rumin Res                 | Petridis          | 2  | Fibrenakis   | GRE | U Thessaly                      |                                          | Review   |              |              |              |         |       |
| 576 | Mastitis in ewes: somatic cell counts, pathogens and antibiotic resistance                                                                                                  | 2019 | J Microbiol Biotechnol Food Sci | Tvarozkova        | 5  | Macuhova     | SLV | Agricultural U Slovakia         | Inst Research Animal Production Slovakia |          | Review       |              |              |         |       |
| 577 | Subclinical mastitis in Lacune sheep: causative agents, impacts on milk production, milk quality, oxidative profiles and treatment efficacy of cellulase                    | 2019 | Microb Pathogen                 | Alba              | 10 | da Silva     | BRA | U Santa Catarina                |                                          | Original | Field        | Aetiology    | Treatment    | Dairy   |       |
| 578 | Experimental study for evaluation of the efficacy of a biofilm-embedded bacteria-based vaccine against Staphylococcus chromogenes-associated mastitis in sheep              | 2019 | Vet Microbiol                   | Vasileiou         | 13 | Fibrenakis   | GRE | U Thessaly                      |                                          | Original | Experimental | Control      |              | Dairy   |       |
| 579 | Detection of cathelicidin-1 in the milk as an early indicator of mastitis in ewes                                                                                           | 2019 | Pathogens                       | Katsafadou        | 12 | Fibrenakis   | GRE | U Thessaly                      | Academy Athens Greece                    |          | Original     | Experimental | Diagnosis    |         | Dairy |
| 580 | Subclinical mastitis in sheep: etiology and association with milk somatic cell count and ewe productivity in three research flocks in the Western United States             | 2019 | Translational Anim Sci          | Kiuth             | 10 | Murphy       | USA | U Montana State                 | Ministry of Agriculture USA              |          | Original     | Field        | Aetiology    | Effects | Dairy |

**Table S2.** Alphabetical list of countries from which papers on ovine mastitis have been published during the period 1970 - 2019.

| <b>Country</b> | <b>No. papers published</b> | <b>Country</b>           | <b>No. papers published</b> |
|----------------|-----------------------------|--------------------------|-----------------------------|
| Algeria        | 1                           | Italy                    | 78                          |
| Argentina      | 1                           | Jordan                   | 12                          |
| Australia      | 24                          | Malaysia                 | 1                           |
| Austria        | 17                          | The Netherlands          | 9                           |
| Bangladesh     | 1                           | Norway                   | 8                           |
| Brazil         | 40                          | New Zealand              | 5                           |
| Bulgaria       | 1                           | Pakistan                 | 1                           |
| Canada         | 8                           | Poland                   | 7                           |
| China          | 2                           | Portugal                 | 9                           |
| Croatia        | 3                           | Republic of South Africa | 1                           |
| Cyprus         | 1                           | Romania                  | 1                           |
| Czech Republic | 6                           | Slovakia                 | 9                           |
| Denmark        | 3                           | Slovenia                 | 5                           |
| Egypt          | 9                           | South Korea              | 1                           |
| Finland        | 1                           | Spain                    | 87                          |
| France         | 31                          | Sweden                   | 8                           |
| Germany        | 11                          | Switzerland              | 6                           |
| Greece         | 87                          | Turkey                   | 17                          |
| India          | 4                           | United Kingdom           | 50                          |
| Iran           | 8                           | United States of America | 26                          |
| Iraq           | 3                           | Venezuela                | 1                           |
| Israel         | 23                          |                          |                             |

**Table S3.** Alphabetical list of scientific establishments from which at least 5 papers on ovine mastitis have been published during the period 1970 - 2019.

| Establishment                                                | Country         | No. of papers published |
|--------------------------------------------------------------|-----------------|-------------------------|
| Agricultural Research Organisation of Brazil                 | Brazil          | 6                       |
| Agricultural Research Organisation of Israel                 | Israel          | 9                       |
| Agricultural Research Service of Aragon                      | Spain           | 10                      |
| Agricultural University of Uppsala                           | Sweden          | 8                       |
| Agrocampus Ovest                                             | France          | 6                       |
| Aristotle University of Thessaloniki                         | Greece          | 21                      |
| Autonomous University of Barcelona                           | Spain           | 5                       |
| Commonwealth Scientific and Industrial Research Organisation | Australia       | 16                      |
| Complutense University of Madrid                             | Spain           | 18                      |
| Federal University Paulista                                  | Brazil          | 5                       |
| Federal University of Pernambuco                             | Brazil          | 6                       |
| Jordan University of Science and Technology                  | Jordan          | 12                      |
| Kimron Veterinary Institute                                  | Israel          | 17                      |
| National Institute of Agronomic Research                     | France          | 21                      |
| Polytechnic University of Valencia                           | Spain           | 11                      |
| Technological Educational Institution of Epirus              | Greece          | 6                       |
| University Miguel Hernandez de Elche                         | Spain           | 6                       |
| University Mustafa Kemal                                     | Turkey          | 5                       |
| University of Edinburgh                                      | United Kingdom  | 6                       |
| University of Foggia                                         | Italy           | 13                      |
| University of Leon                                           | Spain           | 25                      |
| University of London                                         | United Kingdom  | 25                      |
| University of Melbourne                                      | Australia       | 7                       |
| University of Milan                                          | Italy           | 6                       |
| University of Palermo                                        | Italy           | 15                      |
| University of Sao Paulo                                      | Brazil          | 10                      |
| University of Sassari                                        | Italy           | 12                      |
| University of Thessaly                                       | Greece          | 64                      |
| University of Toulouse                                       | France          | 13                      |
| University of Wageningen                                     | The Netherlands | 5                       |
| University of Warwick                                        | United Kingdom  | 6                       |
| University of Zaragoza                                       | Spain           | 8                       |
| University of Zurich                                         | Switzerland     | 5                       |
| Veterinary University of Vienna                              | Austria         | 18                      |
| Zooprophyllactic Institute of Sardinia                       | Italy           | 14                      |

**Table S4.** Classification of papers on ovine mastitis published during the period 1970 – 2019, according to paper type, sheep production system, study type and mastitis aspect covered therein.

|                       |                        |                   |                                                                                                                                                      |
|-----------------------|------------------------|-------------------|------------------------------------------------------------------------------------------------------------------------------------------------------|
| Original papers n=339 | Dairy production n=428 | Experimental n=43 | Aetiology n=2<br>Control n=7<br>Diagnosis n=2<br>Effects n=5<br>Pathogenesis n=22<br>Risk factors n=7<br>Treatment n=3                               |
|                       |                        | Field n=272       | Aetiology n=58<br>Control n=19<br>D. epidemiology n=28<br>Diagnosis n=63<br>Effects n=44<br>Pathogenesis n=18<br>Risk factors n=73<br>Treatment n=16 |
|                       | Meat production n=113  | Laboratory n=113  | Aetiology n=51<br>Control n=1<br>Diagnosis n=9<br>Effects n=2<br>Pathogenesis n=27<br>Risk factors n=6<br>Treatment n=27                             |
|                       |                        | Experimental n=43 | Control n=6<br>Diagnosis n=2<br>Effects n=1<br>Pathogenesis n=16                                                                                     |
|                       |                        | Field n=58        | Aetiology n=17<br>Control n=3<br>D. epidemiology n=4<br>Diagnosis n=11<br>Effects n=14<br>Pathogenesis n=4<br>Risk factors n=13                      |
|                       |                        | Laboratory n=31   | Aetiology n=18<br>Diagnosis n=2<br>Pathogenesis n=6<br>Risk factors n=1<br>Treatment n=4                                                             |
| Wool production n=1   | Field n=1              | Effects n=1       |                                                                                                                                                      |
| Review papers n=41    |                        |                   |                                                                                                                                                      |

**Table S5.** Number of papers on ovine mastitis published during the period 1970 – 2019 originating from the 11 countries with highest number of papers published, classified according to paper type, sheep production system, study type and mastitis aspect covered.

| Country                  | Paper type |        | Production system referred to |      |      | Study type   |       |            | Mastitis aspect covered |         |                 |           |         |              |              |           |
|--------------------------|------------|--------|-------------------------------|------|------|--------------|-------|------------|-------------------------|---------|-----------------|-----------|---------|--------------|--------------|-----------|
|                          | Original   | Review | Dairy                         | Meat | Wool | Experimental | Field | Laboratory | Aetiology               | Control | D. epidemiology | Diagnosis | Effects | Pathogenesis | Risk factors | Treatment |
| Australia                | 23         | 1      | 2                             | 21   | 0    | 14           | 4     | 5          | 5                       | 4       | 1               | 2         | 1       | 11           | 0            | 0         |
| Austria                  | 16         | 1      | 9                             | 7    | 0    | 4            | 11    | 1          | 5                       | 1       | 1               | 4         | 2       | 5            | 0            | 1         |
| Brazil                   | 39         | 1      | 35                            | 4    | 0    | 2            | 24    | 13         | 15                      | 3       | 3               | 9         | 1       | 5            | 4            | 6         |
| France                   | 27         | 4      | 27                            | 0    | 0    | 1            | 11    | 15         | 8                       | 0       | 2               | 2         | 0       | 7            | 9            | 1         |
| Greece                   | 71         | 16     | 71                            | 0    | 0    | 22           | 41    | 8          | 9                       | 5       | 8               | 8         | 4       | 21           | 20           | 5         |
| Israel                   | 22         | 1      | 22                            | 0    | 0    | 2            | 15    | 5          | 5                       | 4       | 1               | 2         | 9       | 2            | 0            | 2         |
| Italy                    | 76         | 2      | 75                            | 1    | 0    | 3            | 54    | 19         | 12                      | 3       | 3               | 12        | 9       | 12           | 21           | 10        |
| Spain                    | 84         | 3      | 83                            | 1    | 0    | 10           | 48    | 26         | 26                      | 6       | 15              | 15        | 2       | 11           | 20           | 5         |
| Turkey                   | 16         | 1      | 16                            | 0    | 0    | 0            | 8     | 8          | 8                       | 1       | 1               | 4         | 0       | 0            | 2            | 2         |
| United Kingdom           | 43         | 7      | 5                             | 38   | 0    | 3            | 24    | 16         | 14                      | 1       | 1               | 5         | 7       | 9            | 8            | 2         |
| United States of America | 24         | 2      | 9                             | 15   | 0    | 2            | 16    | 6          | 10                      | 2       | 2               | 2         | 7       | 3            | 2            | 0         |
| <i>P</i>                 | 0.0071     |        | <0.0001                       |      |      | <0.0001      |       |            | <0.0001                 |         |                 |           |         |              |              |           |

**Table S6.** Associations between journals and countries of origin of papers on ovine mastitis published during the period 1970 - 2019.

| <b>(a) Country origin of papers published in the most used journals</b>                                |                                                                                                                                                                                                                                        |
|--------------------------------------------------------------------------------------------------------|----------------------------------------------------------------------------------------------------------------------------------------------------------------------------------------------------------------------------------------|
| <b>Journal</b>                                                                                         | <b>Two countries with the most papers published therein</b>                                                                                                                                                                            |
| <i>Journal of Dairy Research</i>                                                                       | Greece n=10, Italy n=4                                                                                                                                                                                                                 |
| <i>Journal of Dairy Science</i>                                                                        | Spain n=26, Italy n=9                                                                                                                                                                                                                  |
| <i>Journal of Veterinary Medicine B</i>                                                                | Greece / Spain n=2 (each)                                                                                                                                                                                                              |
| <i>Pesquisa Veterinária Brasileira</i>                                                                 | Brazil n=14                                                                                                                                                                                                                            |
| <i>Small Ruminant Research</i>                                                                         | Greece n=28, Italy n=21                                                                                                                                                                                                                |
| <i>The Veterinary Journal</i>                                                                          | United Kingdom n=6, Greece n=2                                                                                                                                                                                                         |
| <i>The Veterinary Record</i>                                                                           | United Kingdom n=6, France / Greece / Spain n=4 (each)                                                                                                                                                                                 |
| <i>Veterinary Microbiology</i>                                                                         | Greece n=8, Spain n=6                                                                                                                                                                                                                  |
| <b>(b) Most used journals by authors from the 11 countries with highest number of papers published</b> |                                                                                                                                                                                                                                        |
| <b>Country</b>                                                                                         | <b>Two journals with most papers published therein</b>                                                                                                                                                                                 |
| Australia                                                                                              | <i>Research in Veterinary Science</i> / <i>Veterinary Microbiology</i> n=4 (each)                                                                                                                                                      |
| Austria                                                                                                | <i>Wiener Tierärztliche Monatsschrift</i> n=4                                                                                                                                                                                          |
| Brazil                                                                                                 | <i>Pesquisa Veterinária Brasileira</i> n=14,<br><i>Arquivo Brasileiro de Medicina Veterinária e Zootecnia</i> n=5                                                                                                                      |
| France                                                                                                 | <i>Small Ruminant Research</i> n=5, <i>Journal of Dairy Science</i> n=4                                                                                                                                                                |
| Greece                                                                                                 | <i>Small Ruminant Research</i> n=28, <i>Journal of Dairy Research</i> n=10                                                                                                                                                             |
| Israel                                                                                                 | <i>Small Ruminant Research</i> n=8, <i>South African Journal of Animal Science</i> n=3                                                                                                                                                 |
| Italy                                                                                                  | <i>Small Ruminant Research</i> n=21, <i>Italian Journal of Animal Science</i> n=3                                                                                                                                                      |
| Spain                                                                                                  | <i>Journal of Dairy Science</i> n=26, <i>Small Ruminant Research</i> n=11                                                                                                                                                              |
| Turkey                                                                                                 | <i>Kafkas Üniversitesi Veteriner Fakültesi Dergisi</i> n=4, <i>Bulletin of the Veterinary Institute in Pulawy</i> / <i>Tropical Animal Health and Production</i> / <i>Turkish Journal of Veterinary and Animal Sciences</i> n=2 (each) |
| United Kingdom                                                                                         | <i>Journal of Dairy Science</i> / <i>The Veterinary Record</i> / <i>The Veterinary Journal</i> n=6 (each)                                                                                                                              |
| United States of America                                                                               | <i>Journal of Animal Science</i> n=5, <i>Small Ruminant Research</i> n=4                                                                                                                                                               |

**Table S7.** Number of papers on ovine mastitis published during the period 1970 – 2019 in the 8 journals with the majority of relevant papers, classified according to paper type, sheep production system, study type and mastitis aspect covered.

| Journal                                 | Paper type |        | Production system referred to |      |      | Study type   |       |            | Mastitis aspect covered |         |                 |           |         |              |              |           |
|-----------------------------------------|------------|--------|-------------------------------|------|------|--------------|-------|------------|-------------------------|---------|-----------------|-----------|---------|--------------|--------------|-----------|
|                                         | Original   | Review | Dairy                         | Meat | Wool | Experimental | Field | Laboratory | Aetiology               | Control | D. epidemiology | Diagnosis | Effects | Pathogenesis | Risk factors | Treatment |
| <i>Journal of Dairy Research</i>        | 20         | 2      | 18                            | 2    | 0    | 3            | 13    | 4          | 4                       | 2       | 0               | 5         | 3       | 4            | 4            | 0         |
| <i>Journal of Dairy Science</i>         | 54         | 0      | 48                            | 6    | 0    | 5            | 38    | 11         | 13                      | 3       | 0               | 13        | 9       | 3            | 19           | 2         |
| <i>Journal of Veterinary Medicine B</i> | 11         | 0      | 7                             | 4    | 0    | 3            | 4     | 4          | 5                       | 0       | 0               | 1         | 0       | 6            | 0            | 0         |
| <i>Pesquisa Veterinária Brasileira</i>  | 14         | 0      | 13                            | 1    | 0    | 2            | 8     | 4          | 3                       | 2       | 0               | 3         | 2       | 2            | 1            | 4         |
| <i>Small Ruminant Research</i>          | 76         | 14     | 71                            | 5    | 1    | 4            | 60    | 12         | 20                      | 6       | 12              | 18        | 10      | 9            | 14           | 4         |
| <i>The Veterinary Journal</i>           | 10         | 1      | 4                             | 6    | 0    | 4            | 4     | 2          | 1                       | 0       | 2               | 3         | 2       | 2            | 0            | 0         |
| <i>The Veterinary Record</i>            | 13         | 1      | 7                             | 6    | 0    | 1            | 11    | 1          | 3                       | 1       | 1               | 2         | 1       | 2            | 2            | 2         |
| <i>Veterinary Microbiology</i>          | 24         | 5      | 18                            | 6    | 0    | 5            | 3     | 16         | 16                      | 2       | 2               | 1         | 0       | 5            | 2            | 2         |
| <i>P</i>                                | 0.0445     |        | 0.0007                        |      |      | <0.0001      |       |            | 0.0001                  |         |                 |           |         |              |              |           |



**Table S8.** Literature references in papers on ovine mastitis published during the period 1970 – 2019, according to year of publication, country of origin, establishment of origin, journal in which published and characteristic of paper.

| <b>Year of publication</b>                                   | <b>References per paper (<math>\bar{x}\pm se</math>)</b> |
|--------------------------------------------------------------|----------------------------------------------------------|
| 1970s                                                        | 20.0±3.7                                                 |
| 1980s                                                        | 16.4±1.9 <sup>a,b</sup>                                  |
| 1990s                                                        | 21.0±1.1 <sup>c,d</sup>                                  |
| 2000s                                                        | 30.8±1.6 <sup>a,c,e</sup>                                |
| 2010s                                                        | 41.4±1.6 <sup>b,d,e</sup>                                |
| <i>P</i>                                                     | <0.0001                                                  |
| <b>Country of origin</b>                                     | <b>References per paper (<math>\bar{x}\pm se</math>)</b> |
| Australia                                                    | 27.5±2.5 <sup>a</sup>                                    |
| Austria                                                      | 29.5±2.4                                                 |
| Brazil                                                       | 37.1±3.3                                                 |
| France                                                       | 50.6±6.3 <sup>a,b,c,d,e</sup>                            |
| Greece                                                       | 43.5±3.9 <sup>f,g</sup>                                  |
| Israel                                                       | 26.4±3.0 <sup>e,f</sup>                                  |
| Italy                                                        | 35.0±2.0                                                 |
| Spain                                                        | 32.6±2.6 <sup>b</sup>                                    |
| Turkey                                                       | 28.8±2.1                                                 |
| United Kingdom                                               | 27.5±3.5 <sup>g</sup>                                    |
| United States of America                                     | 28.4±3.1 <sup>d</sup>                                    |
| <i>P</i>                                                     | 0.0002                                                   |
| <b>Establishment of origin</b>                               | <b>References per paper (<math>\bar{x}\pm se</math>)</b> |
| Aristotle University of Thessaloniki                         | 39.6±7.8                                                 |
| Commonwealth Scientific and Industrial Research Organisation | 27.1±3.2                                                 |
| Complutense University of Madrid                             | 25.7±2.3                                                 |
| Jordan University of Science and Technology                  | 25.7±4.3                                                 |
| Kimron Veterinary Institute                                  | 28.2±3.7                                                 |
| National Institute of Agronomic Research                     | 50.0±5.7                                                 |
| Polytechnic University of Valencia                           | 30.8±2.9                                                 |
| University of Foggia                                         | 39.7±2.9                                                 |
| University of Leon                                           | 33.8±4.8                                                 |
| University of London                                         | 20.3±3.0                                                 |
| University of Palermo                                        | 35.2±6.0                                                 |
| University of Sassari                                        | 35.2±5.7                                                 |
| University of Thessaly                                       | 47.7±5.0                                                 |
| University of Toulouse                                       | 61.6±9.7                                                 |
| Veterinary University of Vienna                              | 29.0±2.3                                                 |
| Zooprophyllactic Institute of Sardinia                       | 26.9±2.9                                                 |
| <i>P</i>                                                     | <0.0001                                                  |
| <b>Journal</b>                                               | <b>References per paper (<math>\bar{x}\pm se</math>)</b> |
| <i>Journal of Dairy Research</i>                             | 35.5±6.0                                                 |
| <i>Journal of Dairy Science</i>                              | 35.4±3.6                                                 |
| <i>Journal of Veterinary Medicine B</i>                      | 20.2±2.3                                                 |
| <i>Pesquisa Veterinária Brasileira</i>                       | 44.9±3.7                                                 |
| <i>Small Ruminant Research</i>                               | 36.3±2.6                                                 |
| <i>The Veterinary Journal</i>                                | 19.3±3.4                                                 |
| <i>The Veterinary Record</i>                                 | 20.3±3.7 <sup>a</sup>                                    |
| <i>Veterinary Microbiology</i>                               | 43.6±7.0 <sup>a</sup>                                    |
| <i>P</i>                                                     | 0.0034                                                   |

Table S8 (continued)

| <b>Type of paper</b>              |                       |
|-----------------------------------|-----------------------|
| Original                          | 29.6±0.7              |
| Review                            | 81.8±7.1              |
| <i>P</i>                          | <0.0001               |
| <b>Production system</b>          |                       |
| Dairy                             | 31.4±0.8              |
| Meat                              | 22.5±0.8              |
| Wool                              | 21.0                  |
| <i>P</i>                          | <0.0001               |
| <b>Type of work</b>               |                       |
| Experimental                      | 30.7±2.3              |
| Field                             | 28.2±0.8 <sup>a</sup> |
| Laboratory                        | 32.2±1.4 <sup>a</sup> |
| <i>P</i>                          | 0.0310                |
| <b>Aspect of mastitis covered</b> |                       |
| Aetiology                         | 29.4±1.1              |
| Control                           | 26.5±2.0              |
| D. epidemiology                   | 29.2±2.9              |
| Diagnosis                         | 28.0±1.6              |
| Effects                           | 29.5±1.7              |
| Pathogenesis                      | 32.2±2.3              |
| Risk factors                      | 31.3±1.5              |
| Treatment                         | 28.02±2.0             |
| <i>P</i>                          | 0.48                  |

**Table S9.** Citations received by papers on ovine mastitis published during the period 1970 – 2019, and impact of the respective journal, according to year of publication, country of origin, establishment of origin, journal in which published and type of paper, production system, type of study and aspect of mastitis covered.

| Classification                      | Scimago category |     |           | Citations per paper ( $\bar{x}\pm se$ ) | Citations per paper yearly ( $\bar{x}\pm se$ ) | Total cites (n) |
|-------------------------------------|------------------|-----|-----------|-----------------------------------------|------------------------------------------------|-----------------|
|                                     | Q1               | Q2  | $\geq Q3$ |                                         |                                                |                 |
| <b>Year of publications</b>         | (n)              |     |           | ( $\bar{x}\pm se$ )                     | ( $\bar{x}\pm se$ )                            | (n)             |
| 1970s                               | 6                | 0   | 2         | 13.7 $\pm$ 5.5                          | 0.3 $\pm$ 0.1                                  | 109             |
| 1980s                               | 9                | 9   | 4         | 19.8 $\pm$ 3.0                          | 0.6 $\pm$ 0.1 <sup>a</sup>                     | 435             |
| 1990s                               | 42               | 45  | 21        | 22.1 $\pm$ 2.3 <sup>a</sup>             | 0.9 $\pm$ 0.1 <sup>b,c</sup>                   | 2407            |
| 2000s                               | 70               | 73  | 25        | 26.8 $\pm$ 2.9 <sup>b</sup>             | 1.8 $\pm$ 0.2 <sup>b</sup>                     | 4495            |
| 2010s                               | 113              | 103 | 57        | 8.4 $\pm$ 0.6 <sup>a,b</sup>            | 1.9 $\pm$ 0.1 <sup>a,c</sup>                   | 2300            |
| <i>P</i>                            | 0.37             |     |           | <0.0001                                 | 0.0001                                         |                 |
| <b>Country of origin</b>            | (n)              |     |           | ( $\bar{x}\pm se$ )                     | ( $\bar{x}\pm se$ )                            | (n)             |
| Australia                           | 13               | 9   | 2         | 15.3 $\pm$ 1.8 <sup>a</sup>             | 1.0 $\pm$ 0.2 <sup>a</sup>                     | 368             |
| Austria                             | 4                | 5   | 8         | 12.8 $\pm$ 2.5 <sup>b</sup>             | 0.7 $\pm$ 0.1 <sup>b</sup>                     | 217             |
| Brazil                              | 2                | 13  | 25        | 6.4 $\pm$ 1.3 <sup>c,d</sup>            | 1.0 $\pm$ 0.2 <sup>c</sup>                     | 254             |
| France                              | 23               | 6   | 2         | 38.6 $\pm$ 11.1 <sup>a,b,c,e,f,g</sup>  | 3.2 $\pm$ 0.7 <sup>a,b,c,d,e,f</sup>           | 1196            |
| Greece                              | 34               | 50  | 3         | 13.1 $\pm$ 1.9 <sup>d,e</sup>           | 2.2 $\pm$ 0.3                                  | 1143            |
| Israel                              | 10               | 10  | 3         | 28.0 $\pm$ 6.4                          | 2.5 $\pm$ 0.5                                  | 643             |
| Italy                               | 34               | 41  | 3         | 14.5 $\pm$ 1.8 <sup>f</sup>             | 1.8 $\pm$ 0.2                                  | 1132            |
| Spain                               | 55               | 25  | 7         | 24.7 $\pm$ 3.2                          | 1.7 $\pm$ 0.2 <sup>d</sup>                     | 2148            |
| Turkey                              | 1                | 7   | 9         | 7.2 $\pm$ 1.6 <sup>g</sup>              | 0.8 $\pm$ 0.2 <sup>e</sup>                     | 123             |
| United Kingdom                      | 26               | 23  | 1         | 19.3 $\pm$ 3.4                          | 1.6 $\pm$ 0.3 <sup>f</sup>                     | 965             |
| United States of America            | 16               | 7   | 3         | 30.4 $\pm$ 5.4                          | 1.8 $\pm$ 0.4                                  | 791             |
| <i>P</i>                            | <0.0001          |     |           | 0.0001                                  | 0.0004                                         |                 |
| <b>Establishment of origin</b>      | (n)              |     |           | ( $\bar{x}\pm se$ )                     | ( $\bar{x}\pm se$ )                            | (n)             |
| Aristotle U. of Thessaloniki        | 6                | 13  | 2         | 13.5 $\pm$ 2.8                          | 1.3 $\pm$ 0.3                                  | 284             |
| CSIRO                               | 6                | 9   | 1         | 20.0 $\pm$ 1.7                          | 1.1 $\pm$ 0.3                                  | 321             |
| Complutense U. of Madrid            | 10               | 7   | 1         | 20.9 $\pm$ 3.1                          | 1.2 $\pm$ 0.3                                  | 376             |
| Jordan U. of Science and Technology | 3                | 6   | 3         | 8.2 $\pm$ 3.5                           | 0.9 $\pm$ 0.2                                  | 98              |
| Kimron Vet. Inst.                   | 7                | 8   | 2         | 28.8 $\pm$ 8.3                          | 2.9 $\pm$ 0.6                                  | 490             |
| INRA                                | 18               | 2   | 1         | 28.7 $\pm$ 6.2                          | 2.8 $\pm$ 0.4                                  | 603             |
| Polytechnic U. of Valencia          | 6                | 2   | 3         | 10.5 $\pm$ 2.7                          | 0.9 $\pm$ 0.3                                  | 116             |
| U. of Foggia                        | 4                | 8   | 1         | 30.6 $\pm$ 7.1                          | 2.2 $\pm$ 0.4                                  | 398             |
| U. of Leon                          | 17               | 7   | 1         | 43.4 $\pm$ 8.7                          | 2.8 $\pm$ 0.6                                  | 1085            |
| U. of London                        | 9                | 17  | 0         | 18.2 $\pm$ 4.4                          | 0.9 $\pm$ 0.2                                  | 474             |
| U. of Palermo                       | 8                | 7   | 0         | 7.4 $\pm$ 1.6                           | 1.1 $\pm$ 0.2                                  | 111             |
| U. of Sassari                       | 5                | 7   | 0         | 13.6 $\pm$ 2.4                          | 2.6 $\pm$ 0.6                                  | 163             |
| U. of Thessaly                      | 28               | 35  | 1         | 11.8 $\pm$ 1.6                          | 2.5 $\pm$ 0.4                                  | 756             |
| U. of Toulouse                      | 8                | 2   | 0         | 48.7 $\pm$ 25.2                         | 4.3 $\pm$ 1.4                                  | 633             |
| Veterinary U. of Vienna             | 4                | 5   | 9         | 12.6 $\pm$ 2.3                          | 0.7 $\pm$ 0.1                                  | 226             |
| Zooprophyllactic Inst. of Sardinia  | 4                | 8   | 2         | 12.2 $\pm$ 3.7                          | 1.9 $\pm$ 0.5                                  | 171             |
| <i>P</i>                            | <0.0001          |     |           | < 0.0001                                | 0.0435                                         |                 |
| <b>Type of paper</b>                | (n)              |     |           | ( $\bar{x}\pm se$ )                     | ( $\bar{x}\pm se$ )                            | (n)             |
| Review                              | 227              | 209 | 103       | 15.4 $\pm$ 0.8                          | 1.4 $\pm$ 0.1                                  | 8296            |
| <i>P</i>                            | 13               | 21  | 7         | 35.4 $\pm$ 9.9                          | 3.6 $\pm$ 0.7                                  | 1450            |
| <i>P</i>                            | 0.28             |     |           | <0.0001                                 | <0.0001                                        |                 |

CSIRO: Commonwealth Scientific and Industrial Research Organisation Australia, INRA: National Institute of Agronomic Research France, U.: University

Table S9 (continued)

| Classification                    | Scimago category |        |           | Citations per paper ( $\bar{x}\pm se$ ) | Citations per paper yearly ( $\bar{x}\pm se$ ) | Total cites (n) |
|-----------------------------------|------------------|--------|-----------|-----------------------------------------|------------------------------------------------|-----------------|
|                                   | Q1               | Q2     | $\geq Q3$ |                                         |                                                |                 |
| <b>Production system</b>          |                  | (n)    |           | ( $\bar{x}\pm se$ )                     | ( $\bar{x}\pm se$ )                            | (n)             |
| Dairy                             | 171              | 167    | 90        | 15.5±0.9                                | 1.6±0.1                                        | 6639            |
| Meat                              | 57               | 43     | 13        | 14.9±1.4                                | 1.0±0.1                                        | 1687            |
| Wool                              | 0                | 1      | 0         | 3.0                                     | 1.2                                            | 3               |
| <i>P</i>                          |                  | 0.085  |           | 0.083                                   | 0.0031                                         |                 |
| <b>Type of study</b>              |                  | (n)    |           | ( $\bar{x}\pm se$ )                     | ( $\bar{x}\pm se$ )                            | (n)             |
| Experimental                      | 37               | 21     | 7         | 17.1±2.1                                | 1.4±0.2                                        | 1149            |
| Field                             | 116              | 138    | 75        | 15.5±1.1                                | 1.5±0.1                                        | 5097            |
| Laboratory                        | 74               | 50     | 19        | 14.3±1.5                                | 1.6±0.2                                        | 2050            |
| <i>P</i>                          |                  | 0.0006 |           | 0.595                                   | 0.610                                          |                 |
| <b>Aspect of mastitis covered</b> |                  | (n)    |           | ( $\bar{x}\pm se$ )                     | ( $\bar{x}\pm se$ )                            | (n)             |
| Aetiology                         | 66               | 55     | 26        | 18.7±1.7                                | 1.7±0.2                                        | 2736            |
| Control                           | 10               | 19     | 7         | 12.7±2.0                                | 1.0±0.2                                        | 458             |
| D. epidemiology                   | 26               | 38     | 24        | 22.8±4.4                                | 2.2±0.6                                        | 730             |
| Diagnosis                         | 31               | 19     | 16        | 18.0±2.3                                | 1.2±0.1                                        | 1580            |
| Effects                           | 10               | 15     | 7         | 18.8±3.3                                | 1.9±0.3                                        | 1239            |
| Pathogenesis                      | 43               | 35     | 13        | 14.1±1.5                                | 1.4±0.2                                        | 1283            |
| Risk factors                      | 50               | 37     | 13        | 13.0±1.5                                | 1.6±0.2                                        | 1299            |
| Treatment                         | 16               | 23     | 11        | 9.5±1.7                                 | 1.3±0.3                                        | 477             |
| <i>P</i>                          |                  | 0.067  |           | 0.0084                                  | 0.407                                          |                 |

Table S10. Citations received by papers on ovine mastitis published during the period 1970 – 2019, according to the journal in which they have been published.

| Journal                   | Citations per paper ( $\bar{x}\pm se$ ) | Yearly citations per paper ( $\bar{x}\pm se$ ) | Total cites (n) |
|---------------------------|-----------------------------------------|------------------------------------------------|-----------------|
| <i>J. Dairy Res.</i>      | 13.5±2.4                                | 1.6±0.2                                        | 296             |
| <i>J. Dairy Sci.</i>      | 28.9±8.4                                | 2.8±0.8                                        | 1556            |
| <i>J. Vet. Med. B</i>     | 12.2±3.4                                | 0.6±0.2                                        | 134             |
| <i>Pesq. Vet. Brasil.</i> | 7.2±1.6                                 | 0.8±0.2                                        | 43              |
| <i>Small Rumin. Res.</i>  | 22.8±3.3                                | 2.0±0.2                                        | 2051            |
| <i>Vet. J.</i>            | 15.1±3.5                                | 0.9±0.2                                        | 404             |
| <i>Vet. Rec.</i>          | 36.7±8.4                                | 1.5±0.2                                        | 212             |
| <i>Vet Microbiol.</i>     | 18.4±4.0                                | 2.8±0.6                                        | 533             |
| <i>P</i>                  | 0.0183                                  | 0.0015                                         |                 |

Abbreviations of journals from top to bottom: *Journal of Dairy Research*, *Journal of Dairy Science*, *Journal of Veterinary Medicine B*, *Pesquisa Veterinária Brasileira*, *Small Ruminant Research*, *The Veterinary Journal*, *The Veterinary Record*, *Veterinary Microbiology*

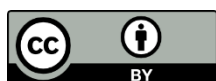

© 2020 by the authors. Licensee MDPI, Basel, Switzerland. This article is an open access article distributed under the terms and conditions of the Creative Commons Attribution (<http://creativecommons.org/licenses/by/4.0/>).
